# Supplementary material for: PRMT1-Mediated Translation Regulation Is a Crucial Vulnerability of Cancer
Source: Oxford University Press journal article supplement (doi:10.1158/0008-5472.can-17-0216), 2017-06-27
Supplement: 00085472can170216-sup-177916_2_supp_4093236_jrdwdn.xlsx [file 00085472can170216-sup-177916_2_supp_4093236_jrdwdn.xlsx]

## Sheet: Sheet1
Supplementary Table 5:GSEA analysis of gene dependencies that correlate with Prmt1 dependency in the human Project Achilles dataset.
NAME	GS<br> follow link to MSigDB	SIZE	ES	NES	NOM p-val	FDR q-val	FWER p-val	RANK AT MAX	LEADING EDGE
GO_RIBONUCLEOPROTEIN_COMPLEX_BIOGENESIS	GO_RIBONUCLEOPROTEIN_COMPLEX_BIOGENESIS	390	0.720018	5.33501	0	0	0	1531	tags=57%, list=9%, signal=61%
GO_RRNA_METABOLIC_PROCESS	GO_RRNA_METABOLIC_PROCESS	228	0.769509	5.32568	0	0	0	1504	tags=67%, list=9%, signal=72%
GO_RIBOSOME_BIOGENESIS	GO_RIBOSOME_BIOGENESIS	275	0.741304	5.27573	0	0	0	1504	tags=61%, list=9%, signal=66%
GO_TRANSLATIONAL_INITIATION	GO_TRANSLATIONAL_INITIATION	135	0.819974	5.17033	0	0	0	1083	tags=71%, list=6%, signal=75%
GO_MULTI_ORGANISM_METABOLIC_PROCESS	GO_MULTI_ORGANISM_METABOLIC_PROCESS	133	0.811304	5.07315	0	0	0	972	tags=69%, list=6%, signal=73%
GO_CYTOSOLIC_RIBOSOME	GO_CYTOSOLIC_RIBOSOME	101	0.817158	4.98686	0	0	0	1171	tags=72%, list=7%, signal=77%
GO_NUCLEAR_TRANSCRIBED_MRNA_CATABOLIC_PROCESS_NONSENSE_MEDIATED_DECAY	GO_NUCLEAR_TRANSCRIBED_MRNA_CATABOLIC_PROCESS_NONSENSE_MEDIATED_DECAY	114	0.803582	4.98675	0	0	0	1068	tags=69%, list=6%, signal=73%
GO_NCRNA_PROCESSING	GO_NCRNA_PROCESSING	341	0.671923	4.92599	0	0	0	1504	tags=50%, list=9%, signal=54%
GO_ESTABLISHMENT_OF_PROTEIN_LOCALIZATION_TO_ENDOPLASMIC_RETICULUM	GO_ESTABLISHMENT_OF_PROTEIN_LOCALIZATION_TO_ENDOPLASMIC_RETICULUM	99	0.821793	4.85234	0	0	0	1171	tags=74%, list=7%, signal=79%
GO_SPLICEOSOMAL_COMPLEX	GO_SPLICEOSOMAL_COMPLEX	159	0.728033	4.78447	0	0	0	1531	tags=58%, list=9%, signal=63%
GO_RNA_SPLICING_VIA_TRANSESTERIFICATION_REACTIONS	GO_RNA_SPLICING_VIA_TRANSESTERIFICATION_REACTIONS	250	0.678059	4.77071	0	0	0	1531	tags=51%, list=9%, signal=55%
GO_NCRNA_METABOLIC_PROCESS	GO_NCRNA_METABOLIC_PROCESS	467	0.627965	4.7427	0	0	0	1504	tags=45%, list=9%, signal=48%
GO_RNA_CATABOLIC_PROCESS	GO_RNA_CATABOLIC_PROCESS	213	0.685326	4.7299	0	0	0	1875	tags=56%, list=11%, signal=63%
GO_PROTEIN_LOCALIZATION_TO_ENDOPLASMIC_RETICULUM	GO_PROTEIN_LOCALIZATION_TO_ENDOPLASMIC_RETICULUM	116	0.773076	4.7086	0	0	0	1068	tags=63%, list=6%, signal=67%
GO_RIBOSOMAL_SUBUNIT	GO_RIBOSOMAL_SUBUNIT	147	0.731197	4.69385	0	0	0	2144	tags=69%, list=13%, signal=79%
GO_RIBOSOME	GO_RIBOSOME	195	0.686308	4.6462	0	0	0	2411	tags=65%, list=14%, signal=75%
GO_CYTOSOLIC_PART	GO_CYTOSOLIC_PART	201	0.686346	4.63236	0	0	0	1068	tags=47%, list=6%, signal=50%
GO_RNA_SPLICING	GO_RNA_SPLICING	330	0.62337	4.58655	0	0	0	1948	tags=48%, list=12%, signal=53%
GO_RIBONUCLEOPROTEIN_COMPLEX_SUBUNIT_ORGANIZATION	GO_RIBONUCLEOPROTEIN_COMPLEX_SUBUNIT_ORGANIZATION	175	0.676702	4.5533	0	0	0	1905	tags=53%, list=11%, signal=59%
GO_CATALYTIC_STEP_2_SPLICEOSOME	GO_CATALYTIC_STEP_2_SPLICEOSOME	83	0.800424	4.52127	0	0	0	1416	tags=69%, list=8%, signal=75%
