# Supplementary material for: PRMT1-Mediated Translation Regulation Is a Crucial Vulnerability of Cancer
Source: Oxford University Press journal article supplement (doi:10.1158/0008-5472.can-17-0216), 2017-06-27
Supplement: 00085472can170216-sup-177916_2_supp_4093237_5rdwdn.xlsx [file 00085472can170216-sup-177916_2_supp_4093237_5rdwdn.xlsx]

## Sheet: Sheet1
Supplementary Table 3:GSEA analysis of differentially expressed genes in the control versus Prmt1 KO mOS at the transcript level using hallmark gene sets.
Negatively Correlated Hallmarks
NAME	GS<br> follow link to MSigDB	SIZE	ES	NES	NOM p-val	FDR q-val	FWER p-val	RANK AT MAX	LEADING EDGE
HALLMARK_E2F_TARGETS	HALLMARK_E2F_TARGETS	143	-0.629753	-2.36473	0	0	0	1993	tags=63%, list=20%, signal=77%
HALLMARK_MYC_TARGETS_V1	HALLMARK_MYC_TARGETS_V1	150	-0.61012	-2.30333	0	0	0	2731	tags=67%, list=27%, signal=91%
HALLMARK_G2M_CHECKPOINT	HALLMARK_G2M_CHECKPOINT	161	-0.51961	-1.96202	0	0	0	2002	tags=53%, list=20%, signal=66%
HALLMARK_MYC_TARGETS_V2	HALLMARK_MYC_TARGETS_V2	38	-0.618483	-1.86086	0	0.000823088	0.004	2279	tags=71%, list=23%, signal=92%
HALLMARK_DNA_REPAIR	HALLMARK_DNA_REPAIR	87	-0.446272	-1.59407	0	0.00857205	0.047	2394	tags=46%, list=24%, signal=60%
Positively Correlated hallmarks
NAME	GS<br> follow link to MSigDB	SIZE	ES	NES	NOM p-val	FDR q-val	FWER p-val	RANK AT MAX	LEADING EDGE
HALLMARK_INTERFERON_ALPHA_RESPONSE	HALLMARK_INTERFERON_ALPHA_RESPONSE	57	0.766787	2.16724	0	0	0	1156	tags=56%, list=12%, signal=63%
HALLMARK_INTERFERON_GAMMA_RESPONSE	HALLMARK_INTERFERON_GAMMA_RESPONSE	138	0.670753	2.08483	0	0	0	1577	tags=43%, list=16%, signal=51%
HALLMARK_IL6_JAK_STAT3_SIGNALING	HALLMARK_IL6_JAK_STAT3_SIGNALING	71	0.696855	1.99582	0	0	0	2021	tags=51%, list=20%, signal=63%
HALLMARK_COMPLEMENT	HALLMARK_COMPLEMENT	142	0.631233	1.95717	0	0	0	1692	tags=36%, list=17%, signal=43%
HALLMARK_COAGULATION	HALLMARK_COAGULATION	101	0.621203	1.89395	0	0	0	1261	tags=29%, list=13%, signal=33%
HALLMARK_P53_PATHWAY	HALLMARK_P53_PATHWAY	152	0.570395	1.78107	0	0.000520732	0.003	2172	tags=47%, list=22%, signal=59%
HALLMARK_APOPTOSIS	HALLMARK_APOPTOSIS	143	0.568051	1.77548	0	0.000446341	0.003	1644	tags=40%, list=16%, signal=47%
HALLMARK_ALLOGRAFT_REJECTION	HALLMARK_ALLOGRAFT_REJECTION	156	0.538276	1.72338	0	0.00114707	0.009	1238	tags=23%, list=12%, signal=26%
HALLMARK_XENOBIOTIC_METABOLISM	HALLMARK_XENOBIOTIC_METABOLISM	146	0.546297	1.71309	0	0.00137467	0.012	1344	tags=28%, list=13%, signal=32%
HALLMARK_TNFA_SIGNALING_VIA_NFKB	HALLMARK_TNFA_SIGNALING_VIA_NFKB	165	0.520249	1.64959	0	0.00359245	0.035	1581	tags=38%, list=16%, signal=45%
HALLMARK_ADIPOGENESIS	HALLMARK_ADIPOGENESIS	143	0.516378	1.59855	0.00115207	0.00806707	0.08	2277	tags=44%, list=23%, signal=56%
HALLMARK_KRAS_SIGNALING_UP	HALLMARK_KRAS_SIGNALING_UP	148	0.502313	1.58495	0.00230947	0.00919907	0.098	1433	tags=24%, list=14%, signal=27%
HALLMARK_HEME_METABOLISM	HALLMARK_HEME_METABOLISM	125	0.514568	1.578	0.00238663	0.00912873	0.104	968	tags=22%, list=10%, signal=24%
HALLMARK_HYPOXIA	HALLMARK_HYPOXIA	158	0.493094	1.54511	0	0.0129908	0.154	1457	tags=34%, list=15%, signal=39%
HALLMARK_INFLAMMATORY_RESPONSE	HALLMARK_INFLAMMATORY_RESPONSE	151	0.489621	1.53425	0.00114286	0.0141872	0.176	1342	tags=32%, list=13%, signal=36%
HALLMARK_UV_RESPONSE_UP	HALLMARK_UV_RESPONSE_UP	125	0.496605	1.5251	0.0035545	0.0149939	0.198	1458	tags=30%, list=15%, signal=35%
HALLMARK_MYOGENESIS	HALLMARK_MYOGENESIS	171	0.45251	1.45923	0.0023068	0.0295843	0.385	1934	tags=33%, list=19%, signal=41%
HALLMARK_IL2_STAT5_SIGNALING	HALLMARK_IL2_STAT5_SIGNALING	159	0.458705	1.45144	0.00228311	0.0314542	0.423	1863	tags=35%, list=19%, signal=43%
HALLMARK_APICAL_SURFACE	HALLMARK_APICAL_SURFACE	31	0.569698	1.43593	0.0506849	0.0363032	0.501	2555	tags=55%, list=26%, signal=73%
