# Supplementary material for: PRMT1-Mediated Translation Regulation Is a Crucial Vulnerability of Cancer
Source: Oxford University Press journal article supplement (doi:10.1158/0008-5472.can-17-0216), 2017-06-27
Supplement: 00085472can170216-sup-177916_2_supp_4093239_zrdwdz.xlsx [file 00085472can170216-sup-177916_2_supp_4093239_zrdwdz.xlsx]

## Sheet: Sheet1
Supplementary Table 2:GSEA analysis of differentially expressed genes in the control versus Prmt1 KO mOS at the transcript level using GO gene sets.
Negatively Correlated GO terms
NAME	GS<br> follow link to MSigDB	SIZE	ES	NES	NOM p-val	FDR q-val	FWER p-val	RANK AT MAX	LEADING EDGE
GO_CHROMOSOME_SEGREGATION	GO_CHROMOSOME_SEGREGATION	145	-0.569374	-2.13993	0	0.0029285	0.003	2435	tags=54%, list=24%, signal=70%
GO_NUCLEAR_CHROMOSOME_SEGREGATION	GO_NUCLEAR_CHROMOSOME_SEGREGATION	118	-0.569248	-2.07617	0	0.00891865	0.019	1723	tags=40%, list=17%, signal=48%
GO_MEIOTIC_CHROMOSOME_SEGREGATION	GO_MEIOTIC_CHROMOSOME_SEGREGATION	32	-0.710932	-2.07137	0	0.006886	0.021	693	tags=34%, list=7%, signal=37%
GO_TRANSLATION_INITIATION_FACTOR_ACTIVITY	GO_TRANSLATION_INITIATION_FACTOR_ACTIVITY	30	-0.718483	-2.05519	0	0.00728095	0.03	1876	tags=53%, list=19%, signal=65%
GO_TRANSLATIONAL_INITIATION	GO_TRANSLATIONAL_INITIATION	82	-0.582555	-2.04324	0	0.00867152	0.045	3116	tags=66%, list=31%, signal=95%
GO_SINGLE_STRANDED_DNA_BINDING	GO_SINGLE_STRANDED_DNA_BINDING	52	-0.642918	-2.03563	0	0.0081958	0.05	1414	tags=52%, list=14%, signal=60%
GO_RIBONUCLEOPROTEIN_COMPLEX_BIOGENESIS	GO_RIBONUCLEOPROTEIN_COMPLEX_BIOGENESIS	213	-0.511747	-2.029	0	0.00756776	0.054	2857	tags=61%, list=29%, signal=83%
GO_HOMOLOGOUS_CHROMOSOME_SEGREGATION	GO_HOMOLOGOUS_CHROMOSOME_SEGREGATION	23	-0.732937	-1.99572	0	0.0107293	0.085	693	tags=35%, list=7%, signal=37%
GO_RIBOSOME_BIOGENESIS	GO_RIBOSOME_BIOGENESIS	153	-0.520344	-1.99563	0	0.00964273	0.086	3043	tags=67%, list=30%, signal=95%
GO_RECIPROCAL_MEIOTIC_RECOMBINATION	GO_RECIPROCAL_MEIOTIC_RECOMBINATION	26	-0.710594	-1.97766	0	0.0119139	0.118	1414	tags=50%, list=14%, signal=58%
GO_SISTER_CHROMATID_SEGREGATION	GO_SISTER_CHROMATID_SEGREGATION	92	-0.550763	-1.95147	0	0.0165701	0.177	2425	tags=55%, list=24%, signal=72%
GO_CONDENSED_CHROMOSOME_CENTROMERIC_REGION	GO_CONDENSED_CHROMOSOME_CENTROMERIC_REGION	48	-0.598242	-1.95126	0	0.0151893	0.177	2421	tags=65%, list=24%, signal=85%
GO_DNA_DEPENDENT_DNA_REPLICATION	GO_DNA_DEPENDENT_DNA_REPLICATION	69	-0.580714	-1.95112	0	0.0140209	0.177	2335	tags=61%, list=23%, signal=79%
GO_DNA_REPLICATION	GO_DNA_REPLICATION	143	-0.520919	-1.93415	0	0.0175598	0.228	2145	tags=52%, list=21%, signal=66%
GO_MEIOTIC_CELL_CYCLE_PROCESS	GO_MEIOTIC_CELL_CYCLE_PROCESS	87	-0.543137	-1.93121	0	0.0177898	0.243	1587	tags=41%, list=16%, signal=49%
GO_DNA_RECOMBINATION	GO_DNA_RECOMBINATION	123	-0.515648	-1.89891	0	0.0264947	0.358	1993	tags=48%, list=20%, signal=59%
GO_RECIPROCAL_DNA_RECOMBINATION	GO_RECIPROCAL_DNA_RECOMBINATION	26	-0.710594	-1.89829	0.00316456	0.0251597	0.361	1414	tags=50%, list=14%, signal=58%
GO_SISTER_CHROMATID_COHESION	GO_SISTER_CHROMATID_COHESION	59	-0.569797	-1.89635	0	0.0243928	0.367	2425	tags=61%, list=24%, signal=80%
GO_DEOXYRIBONUCLEASE_ACTIVITY	GO_DEOXYRIBONUCLEASE_ACTIVITY	46	-0.609359	-1.89368	0	0.0242138	0.381	2444	tags=63%, list=24%, signal=83%
GO_SYNAPSIS	GO_SYNAPSIS	17	-0.745477	-1.88657	0	0.0255543	0.418	683	tags=29%, list=7%, signal=32%
Positively Correlated GO terms
NAME	GS<br> follow link to MSigDB	SIZE	ES	NES	NOM p-val	FDR q-val	FWER p-val	RANK AT MAX	LEADING EDGE
GO_INNATE_IMMUNE_RESPONSE	GO_INNATE_IMMUNE_RESPONSE	321	0.632075	2.08557	0	0	0	1633	tags=33%, list=16%, signal=39%
GO_DRUG_METABOLIC_PROCESS	GO_DRUG_METABOLIC_PROCESS	22	0.887503	2.06842	0	0	0	301	tags=32%, list=3%, signal=33%
GO_DNA_PACKAGING_COMPLEX	GO_DNA_PACKAGING_COMPLEX	68	0.713021	2.01785	0	0.000340565	0.001	925	tags=41%, list=9%, signal=45%
GO_HUMORAL_IMMUNE_RESPONSE	GO_HUMORAL_IMMUNE_RESPONSE	86	0.690931	2.01296	0	0.000255424	0.001	1361	tags=28%, list=14%, signal=32%
GO_ACUTE_PHASE_RESPONSE	GO_ACUTE_PHASE_RESPONSE	31	0.788594	1.98354	0	0.000612536	0.003	969	tags=35%, list=10%, signal=39%
GO_SERINE_HYDROLASE_ACTIVITY	GO_SERINE_HYDROLASE_ACTIVITY	118	0.651137	1.98274	0	0.000510447	0.003	474	tags=16%, list=5%, signal=17%
GO_NUCLEAR_NUCLEOSOME	GO_NUCLEAR_NUCLEOSOME	25	0.805854	1.95673	0	0.00218425	0.015	407	tags=52%, list=4%, signal=54%
GO_COMPLEMENT_ACTIVATION	GO_COMPLEMENT_ACTIVATION	25	0.809551	1.9503	0	0.00216621	0.017	878	tags=24%, list=9%, signal=26%
GO_INTERMEDIATE_FILAMENT_BASED_PROCESS	GO_INTERMEDIATE_FILAMENT_BASED_PROCESS	27	0.783518	1.94246	0	0.00226582	0.02	1142	tags=37%, list=11%, signal=42%
GO_NEGATIVE_REGULATION_OF_LIPID_METABOLIC_PROCESS	GO_NEGATIVE_REGULATION_OF_LIPID_METABOLIC_PROCESS	59	0.7003	1.94139	0	0.00203924	0.02	506	tags=22%, list=5%, signal=23%
GO_VACUOLAR_LUMEN	GO_VACUOLAR_LUMEN	87	0.656338	1.93801	0	0.00203946	0.022	1296	tags=45%, list=13%, signal=51%
GO_ANTIGEN_BINDING	GO_ANTIGEN_BINDING	41	0.74367	1.93717	0	0.00195409	0.022	594	tags=29%, list=6%, signal=31%
GO_DEFENSE_RESPONSE_TO_GRAM_POSITIVE_BACTERIUM	GO_DEFENSE_RESPONSE_TO_GRAM_POSITIVE_BACTERIUM	43	0.723166	1.92281	0	0.00282144	0.035	1160	tags=42%, list=12%, signal=47%
GO_ANTIMICROBIAL_HUMORAL_RESPONSE	GO_ANTIMICROBIAL_HUMORAL_RESPONSE	22	0.815719	1.91951	0	0.00276499	0.037	1160	tags=59%, list=12%, signal=67%
GO_RESPONSE_TO_TYPE_I_INTERFERON	GO_RESPONSE_TO_TYPE_I_INTERFERON	30	0.760525	1.9022	0	0.00406876	0.057	1342	tags=57%, list=13%, signal=65%
GO_INTERFERON_GAMMA_MEDIATED_SIGNALING_PATHWAY	GO_INTERFERON_GAMMA_MEDIATED_SIGNALING_PATHWAY	44	0.711927	1.90132	0	0.00381446	0.057	2075	tags=59%, list=21%, signal=74%
GO_LYTIC_VACUOLE	GO_LYTIC_VACUOLE	332	0.571599	1.89897	0	0.00359008	0.057	2129	tags=43%, list=21%, signal=53%
GO_REGULATION_OF_NATURAL_KILLER_CELL_MEDIATED_IMMUNITY	GO_REGULATION_OF_NATURAL_KILLER_CELL_MEDIATED_IMMUNITY	18	0.855868	1.89537	0	0.00361508	0.06	321	tags=33%, list=3%, signal=34%
GO_REGULATION_OF_LEUKOCYTE_MEDIATED_CYTOTOXICITY	GO_REGULATION_OF_LEUKOCYTE_MEDIATED_CYTOTOXICITY	32	0.754149	1.88939	0	0.00412302	0.073	643	tags=25%, list=6%, signal=27%
GO_REGULATION_OF_LYMPHOCYTE_MEDIATED_IMMUNITY	GO_REGULATION_OF_LYMPHOCYTE_MEDIATED_IMMUNITY	69	0.656416	1.88804	0	0.00412023	0.077	761	tags=22%, list=8%, signal=23%
