# Supplementary material for: PRMT1-Mediated Translation Regulation Is a Crucial Vulnerability of Cancer
Source: Oxford University Press journal article supplement (doi:10.1158/0008-5472.can-17-0216), 2017-06-27
Supplement: 00085472can170216-sup-177916_2_supp_4093245_4rdwdp.xlsx [file 00085472can170216-sup-177916_2_supp_4093245_4rdwdp.xlsx]

## Sheet: mmR IAP
Supplementary Table 1:Arginine methylated peptides identified by SILAC-proteomics
Accession	Protein Descriptions	Gene Symbol	Sites	Peptides	Ratio (Prmt1KD/ControlKD)
Q7TSJ2	microtubule-associated protein 6 isoform 1 [Mus musculus]	Map6	mmR375; mmR384	RKAGPAWMVR	0.00238216
O35710	nocturnin [Mus musculus]	Noct	mmR60; mmR71	SRPRTVSSMGNGTSRLYSALAK	0.00587106
Q9WTV7	E3 ubiquitin-protein ligase RLIM [Mus musculus]	Rlim	mmR353	SQAPNNTVTYESERGGFR	0.010035
Q62381	tolloid-like protein 1 precursor [Mus musculus]	Tll1	mmR329	DDNGIRPAIGQR	0.0103808
Q811D0	disks large homolog 1 [Mus musculus]	Dlg1	mmR521	IISVNSVDLR	0.0114179
Q9CPR8	melanoma-associated antigen G1 [Mus musculus]	Nsmce3	dmR8; dmR10; mmR19	GRGRPSTQADPER	0.0153865
Q99J56	derlin-1 [Mus musculus]	Derl1	dmR214	RGGVSGFGVPPASMRR	0.0169523
Q80Z37	E3 ubiquitin-protein ligase Topors [Mus musculus]	Topors	mmR29	EEGEAPPLVPAEEGRR	0.0177268
Q9CY66	H/ACA ribonucleoprotein complex subunit 1 [Mus musculus]	Gar1	dmR42	GGGSNNHFRGGGGGGGGSFR	0.0220225
Q9JKB3	DNA-binding protein A short isoform [Mus musculus]	Ybx3	mmR161	GAEAANVTGPDGVPVEGSRYAADR	0.0240566
O88569	heterogeneous nuclear ribonucleoproteins A2/B1 isoform 1 [Mus musculus]	Hnrnpa2b1	dmR213; mmR238	GGNFGFGDSRGGGGNFGPGPGSNFRGGSDGYGSGR	0.0281825
Q9D8E6	60S ribosomal protein L4 [Mus musculus]	Rpl4	mmR71	QPYAVSELAGHQTSAESWGTGR	0.0312846
Q80Z37	E3 ubiquitin-protein ligase Topors [Mus musculus]	Topors	dmR50; mmR51	HRPSLLSRR	0.0335894
Q9WTV7	E3 ubiquitin-protein ligase RLIM [Mus musculus]	Rlim	mmR357	SQAPNNTVTYESERGGFR	0.0339788
A2AGH6	mediator of RNA polymerase II transcription subunit 12 [Mus musculus]	Med12	dmR1837	NEDYGMGPGRSGPYGVTVPPDLLHHANPGSISHLSYR	0.0382211
O35326	PREDICTED: serine/arginine-rich splicing factor 5-like [Mus musculus]	Srsf5	mmR88	YSDRFSSR	0.0383348
Q8BFX3	BTB/POZ domain-containing protein KCTD3 [Mus musculus]	Kctd3	mmR767	KGFEAGGFLGRK	0.0399331
Q61656	probable ATP-dependent RNA helicase DDX5 [Mus musculus]	Ddx5	mmR502	RGGFNTFR	0.0410895
Q91Z96	BMP-2-inducible protein kinase [Mus musculus]	Bmp2k	dmR39; dmR45	MPKSEGSGGGAAAGGAAGGGLGGGFASSSMGVRVFAVGR	0.0412611
O88569	heterogeneous nuclear ribonucleoproteins A2/B1 isoform 1 [Mus musculus]	Hnrnpa2b1	dmR213; mmR228; mmR238	GGNFGFGDSRGGGGNFGPGPGSNFRGGSDGYGSGR	0.0415627
O88569	heterogeneous nuclear ribonucleoproteins A2/B1 isoform 1 [Mus musculus]	Hnrnpa2b1	mmR203; dmR213	SGRGGNFGFGDSRGGGGNFGPGPGSNFR	0.0425324
Q9Z1Y4	thyroid receptor-interacting protein 6 [Mus musculus]	Trip6	dmR190; mmR209	RGASQASGPLPGPHFPLTGRGEVWGAGYR	0.0432199
Q8CCS6	polyadenylate-binding protein 2 [Mus musculus]	Pabpn1	mmR236	TSLALDESLFRGR	0.0434858
F8VQB6	myosin X [Mus musculus]	Myo10	dmR737; mmR738	RREEEIDR	0.0439984
Q9R1C7	pre-mRNA-processing factor 40 homolog A [Mus musculus]	Prpf40a	mmR9	MRPGTGAERGGLMVSEMESQPPSRGPGDGER; MRPGTGAERGGLMVSEMESQPPSR	0.0448571
Q8CCS6	polyadenylate-binding protein 2 [Mus musculus]	Pabpn1	mmR234	TSLALDESLFR; TSLALDESLFRGR	0.0451152
Q99KG3	RNA-binding protein 10 isoform 1 [Mus musculus]	Rbm10	mmR902	GSGLGARGSSYGVTSTESYK	0.0451791
Q9CY58	plasminogen activator inhibitor 1 RNA-binding protein isoform 1 [Mus musculus]	Serbp1	mmR216	RGGSGSHNWGTVKDELTESPK	0.0452445
Q8BMD5	cytidine and dCMP deaminase domain-containing protein 1 isoform 2 [Mus musculus]	Cdadc1	mmR496	ENGVLRR	0.0452692
D3YXK2	scaffold attachment factor B [Mus musculus]	Safb	dmR331	REPADAPGGGTGMDR	0.0452881
Q80W00	serine/threonine-protein phosphatase 1 regulatory subunit 10 isoform 2 [Mus musculus]	Ppp1r10	mmR693; mmR705	GGPMRGGPGPAPGPYHR	0.046023
Q61545	RNA-binding protein EWS [Mus musculus]	Ewsr1	dmR614; mmR631	RGGPGGPPGPLMEQMGGR	0.0467213
Q3UC65	hypothetical protein LOC27981 [Mus musculus]	Rsrp1	mmR145	WSYYAITR	0.047437
Q00PI9	heterogeneous nuclear ribonucleoprotein U-like protein 2 [Mus musculus]	Hnrnpul2	mmR669; dmR682	GYDNRAYGQQYWGQSGNRGGYR	0.048095
O88569	heterogeneous nuclear ribonucleoproteins A2/B1 isoform 2 [Mus musculus]; heterogeneous nuclear ribonucleoproteins A2/B1 isoform 1 [Mus musculus]	Hnrnpa2b1	dmR203; mmR213	SGRGGNFGFGDSRGGGGNFGPGPGSNFR; SGRGGNFGFGDSR	0.048666
P97855	ras GTPase-activating protein-binding protein 1 [Mus musculus]	G3bp1	mmR445	GPPRGGMVQKPGFGVGR	0.0488394
P13864	DNA (cytosine-5)-methyltransferase 1 isoform 3 [Mus musculus]	Dnmt1	mmR1553	VVSVRECAR	0.0493826
O88569	heterogeneous nuclear ribonucleoproteins A2/B1 isoform 2 [Mus musculus]; heterogeneous nuclear ribonucleoproteins A2/B1 isoform 1 [Mus musculus]	Hnrnpa2b1	mmR213	GGNFGFGDSRGGGGNFGPGPGSNFRGGSDGYGSGR; SGRGGNFGFGDSRGGGGNFGPGPGSNFR; GGNFGFGDSRGGGGNFGPGPGSNFR	0.0496225
P61082	NEDD8-conjugating enzyme Ubc12 isoform 1 [Mus musculus]	Ube2m	mmR169	SMRGGYIGSTYFER	0.0500592
Q9R1C7	pre-mRNA-processing factor 40 homolog A [Mus musculus]	Prpf40a	mmR2	MRPGTGAERGGLMVSEMESQPPSR	0.0506307
Q811D0	disks large homolog 1 [Mus musculus]	Dlg1	mmR310	RKPASEKIMEIK	0.0524325
Q8R4U7	leucine zipper protein 1 [Mus musculus]	Luzp1	dmR451; dmR455	ASNMGMGTDSGTQETKRTEDR	0.052635
P97855	ras GTPase-activating protein-binding protein 1 [Mus musculus]	G3bp1	dmR445; mmR458	GPPRGGMVQKPGFGVGR	0.0526994
P27790	major centromere autoantigen B [Mus musculus]	Cenpb	dmR284	ALDTRMAAESRR	0.0528433
P62717	60S ribosomal protein L18a [Mus musculus]	Rpl18a	mmR83	NFGIWLR	0.0532824
Q99PP2	zinc finger protein 318 isoform 1 [Mus musculus]	Znf318	dmR494	LSADRHLSGDR	0.0546365
Q91WT8	RNA-binding protein 47 [Mus musculus]	Rbm47	mmR396; mmR407	TPGPRGSYLGGYSAGR	0.0561298
Q6PDM2	serine/arginine-rich splicing factor 1 isoform 1 [Mus musculus]	Srsf1	mmR93; dmR97	SGRGTGRGGGGGGGGGAPR	0.0569233
O88569	heterogeneous nuclear ribonucleoproteins A2/B1 isoform 2 [Mus musculus]; heterogeneous nuclear ribonucleoproteins A2/B1 isoform 1 [Mus musculus]	Hnrnpa2b1	mmR203; mmR213	SGRGGNFGFGDSRGGGGNFGPGPGSNFR; SGRGGNFGFGDSR	0.0575843
Q6PDM2	serine/arginine-rich splicing factor 1 isoform 1 [Mus musculus]	Srsf1	mmR97; dmR109	GTGRGGGGGGGGGAPRGR	0.0578118
O35691	pinin [Mus musculus]	Pnn	dmR54; mmR56	LLALSGPGGGRGR	0.0595024
Q6PDM2	serine/arginine-rich splicing factor 1 isoform 1 [Mus musculus]	Srsf1	dmR97; mmR109	GTGRGGGGGGGGGAPR; SGRGTGRGGGGGGGGGAPR	0.0602332
Q00PI9	heterogeneous nuclear ribonucleoprotein U-like protein 2 [Mus musculus]	Hnrnpul2	mmR736	YYRNYYGYQGYR	0.0612242
Q8BGC0	HIV Tat-specific factor 1 homolog [Mus musculus]	Htatsf1	dmR385; dmR394	RMDSIAGSERPGPSRMR	0.0617024
O88569	heterogeneous nuclear ribonucleoproteins A2/B1 isoform 2 [Mus musculus]; heterogeneous nuclear ribonucleoproteins A2/B1 isoform 1 [Mus musculus]	Hnrnpa2b1	mmR228	GGGGNFGPGPGSNFRGGSDGYGSGR; GGGGNFGPGPGSNFR	0.062615
O88569	heterogeneous nuclear ribonucleoproteins A2/B1 isoform 1 [Mus musculus]	Hnrnpa2b1	mmR213; mmR228	GGNFGFGDSRGGGGNFGPGPGSNFRGGSDGYGSGR; GGNFGFGDSRGGGGNFGPGPGSNFR	0.0628342
P98083	SHC-transforming protein 1 isoform b [Mus musculus]	Shc1	mmR415	KQMLPPPPCPGR	0.0642394
Q8BGF7	PAB-dependent poly(A)-specific ribonuclease subunit 2 [Mus musculus]	Pan2	mmR432	APPVDAEILRTMK	0.0648109
Q8VC31	coiled-coil domain-containing protein 9 isoform 1 [Mus musculus]	Ccdc9	mmR120; dmR128	ASQGWEDGAGEQLRGGPGGRGR	0.0667911
Q5RJ54	zinc finger protein 187 [Mus musculus]	Zscan26	dmR138; dmR149; mmR150	SRPTVLVGEPAPRR	0.0671082
Q64143	phosphatidylinositol 3-kinase regulatory subunit gamma [Mus musculus]	Pik3r3	mmR90	DMPDGTFLVR	0.0685464
Q60749	KH domain-containing, RNA-binding, signal transduction-associated protein 1 [Mus musculus]	Khdrbs1	dmR331; mmR340; dmR346	GATVTRGVPPPPTVRGAPTPR	0.070173
Q60749	KH domain-containing, RNA-binding, signal transduction-associated protein 1 [Mus musculus]	Khdrbs1	dmR325; dmR331; mmR340	GSITRGATVTRGVPPPPTVR	0.0710458
Q6PDM2	serine/arginine-rich splicing factor 1 isoform 1 [Mus musculus]	Srsf1	dmR93; mmR97; mmR109	SGRGTGRGGGGGGGGGAPR	0.0717825
P50446	keratin, type II cytoskeletal 75 [Mus musculus]	Krt6a	mmR358	SRAEAESWYQTKYEELQVTAGR	0.0718553
Q8K4P0	WD repeat domain 33 isoform 1 [Mus musculus]	Wdr33	mmR1023; mmR1028	LREFEGRGGPLPQEEK	0.0725524
Q7TMK9	heterogeneous nuclear ribonucleoprotein Q isoform 2 [Mus musculus]	Syncrip	mmR501; mmR504	GGRGARGAAPSR	0.0725955
O88569	heterogeneous nuclear ribonucleoproteins A2/B1 isoform 2 [Mus musculus]; heterogeneous nuclear ribonucleoproteins A2/B1 isoform 1 [Mus musculus]	Hnrnpa2b1	dmR228	GGGGNFGPGPGSNFRGGSDGYGSGR	0.0734659
Q00PI9	heterogeneous nuclear ribonucleoprotein U-like protein 2 [Mus musculus]	Hnrnpul2	mmR664	RGYDNR	0.0738259
Q8C5K5	hypothetical protein LOC69155 [Mus musculus]	No match	mmR65	GLLAAVPGLGPHATCRGGSR	0.0747189
Q8VE37	regulator of chromosome condensation isoform 2 [Mus musculus]	Rcc1	mmR214	VPELFANR; VPELFANRGGR	0.0758021
Q9DCG9	PREDICTED: tRNA methyltransferase 112 homolog [Mus musculus]	Trmt112	mmR19	LLTHNLLSSHVRGVGTR	0.0766823
Q8VE37	regulator of chromosome condensation isoform 2 [Mus musculus]	Rcc1	mmR217	VPELFANRGGR	0.0772424
O88569	heterogeneous nuclear ribonucleoproteins A2/B1 isoform 2 [Mus musculus]; heterogeneous nuclear ribonucleoproteins A2/B1 isoform 1 [Mus musculus]	Hnrnpa2b1	mmR228; mmR238	GGGGNFGPGPGSNFRGGSDGYGSGRGFGDGYNGYGGGPGGGNFGGSPGYGGGR; GGGGNFGPGPGSNFRGGSDGYGSGR	0.0776462
P49312	heterogeneous nuclear ribonucleoprotein A1 isoform a [Mus musculus]	Hnrnpa1	dmR194; mmR196	QEMASASSSQRGR	0.0779908
Q6NZL6	tonsoku-like protein [Mus musculus]	Tonsl	mmR796	AAYQAAIRGVGSAQSR	0.0783103
Q810A7	ATP-dependent RNA helicase DDX42 [Mus musculus]	Ddx42	mmR12	RGFGFGGFAISAGK; RGFGFGGFAISAGKK	0.0806082
Q60749	KH domain-containing, RNA-binding, signal transduction-associated protein 1 [Mus musculus]	Khdrbs1	dmR331; mmR340	GATVTRGVPPPPTVR	0.0817761
Q9JLI8	squamous cell carcinoma antigen recognized by T-cells 3 [Mus musculus]	Sart3	mmR576; dmR581	LARVNEQR	0.0832517
Q3TSG4	probable alpha-ketoglutarate-dependent dioxygenase ABH5 [Mus musculus]	Alkbh5	mmR360	RGSFSSENYWR	0.0890341
E9Q8X5	zinc finger and BTB domain containing 10 [Mus musculus]	Zbtb10	mmR121	TLAFRGGGGGGLGNNGSSR	0.0891052
Q6PDM2	serine/arginine-rich splicing factor 1 isoform 1 [Mus musculus]	Srsf1	mmR111	GGGGGGGGGAPRGR	0.0895582
Q61545	RNA-binding protein EWS [Mus musculus]	Ewsr1	dmR463; mmR470; mmR485	EGRGMPPPLRGGPGGPGGPGGPMGR	0.0904498
Q8R0G9	nuclear pore complex protein Nup133 [Mus musculus]	Nup133	mmR17; mmR30	RGPLVGIGPTSTPR	0.0922474
Q61545	RNA-binding protein EWS [Mus musculus]	Ewsr1	dmR463; mmR470	EGRGMPPPLRGGPGGPGGPGGPMGR	0.0926414
Q8CGC4	protein LSM14 homolog B [Mus musculus]	Lsm14b	mmR351	LNTETFGVSGR; KLNTETFGVSGR	0.0932686
Q64364	cyclin-dependent kinase inhibitor 2A, isoform 3 isoform 1 [Mus musculus]	Cdkn2a	mmR97	GPHYLLPPGARR; GPHYLLPPGAR	0.0933723
Q8BG81	polymerase delta-interacting protein 3 [Mus musculus]	Poldip3	mmR20	GRLSVRPGIGGVR	0.0938204
Q9CX86	heterogeneous nuclear ribonucleoprotein A0 [Mus musculus]	Hnrnpa0	mmR139	RGFGFVYFQSHDAADK; KRGFGFVYFQSHDAADK	0.0945907
Q61545	RNA-binding protein EWS [Mus musculus]	Ewsr1	mmR463; dmR470	EGRGMPPPLRGGPGGPGGPGGPMGR	0.0974905
Q61545	RNA-binding protein EWS [Mus musculus]	Ewsr1	mmR463; dmR470; mmR485	EGRGMPPPLRGGPGGPGGPGGPMGR	0.0991898
Q60865	caprin-1 isoform a [Mus musculus]	Caprin1	mmR665	DYSGYQRDGYQQNFK	0.099226
Q8BH15	CCR4-NOT transcription complex subunit 10 [Mus musculus]	Cnot10	mmR263	SNFEYLRGNYR	0.0993602
Q9DBR0	A-kinase anchor protein 8 [Mus musculus]	Akap8	mmR109	EGGRGGISSGGEGVQDR	0.0995101
Q60749	KH domain-containing, RNA-binding, signal transduction-associated protein 1 [Mus musculus]	Khdrbs1	mmR325; dmR331; mmR340	GSITRGATVTRGVPPPPTVR	0.0998748
Q6PDM2	serine/arginine-rich splicing factor 1 isoform 1 [Mus musculus]	Srsf1	mmR97; mmR109	GTGRGGGGGGGGGAPR	0.10005
P62960	nuclease-sensitive element-binding protein 1 [Mus musculus]	Ybx1	mmR183	NYQQNYQNSESGEKNEGSESAPEGQAQQR	0.10074
O88569	heterogeneous nuclear ribonucleoproteins A2/B1 isoform 1 [Mus musculus]	Hnrnpa2b1	mmR203; dmR213; mmR228	SGRGGNFGFGDSRGGGGNFGPGPGSNFR	0.101201
Q9R226	KH domain-containing, RNA-binding, signal transduction-associated protein 3 [Mus musculus]	Khdrbs3	mmR187	QAQLQELTYLNGGSENADVPVVR	0.101704
Q3TLH4	protein PRRC2C [Mus musculus]	Prrc2c	dmR1159; mmR1161	DRDWFPDQGYRGR	0.101775
Q60749	KH domain-containing, RNA-binding, signal transduction-associated protein 1 [Mus musculus]	Khdrbs1	dmR325; mmR331; mmR340	GSITRGATVTRGVPPPPTVR	0.102195
Q9CWS1	E3 ubiquitin-protein ligase RNF135 [Mus musculus]	Rnf135	mmR263	TLSYNLEVSNNSR	0.102358
O88569	heterogeneous nuclear ribonucleoproteins A2/B1 isoform 1 [Mus musculus]	Hnrnpa2b1	dmR203; dmR213	SGRGGNFGFGDSRGGGGNFGPGPGSNFR	0.103224
P24527	leukotriene A-4 hydrolase [Mus musculus]	Lta4h	mmR538	FRWLR	0.103982
O88569	heterogeneous nuclear ribonucleoproteins A2/B1 isoform 1 [Mus musculus]	Hnrnpa2b1	dmR213; dmR228; mmR238	GGNFGFGDSRGGGGNFGPGPGSNFRGGSDGYGSGR	0.104934
O89086	putative RNA-binding protein 3 isoform 1 [Mus musculus]; putative RNA-binding protein 3 isoform 2 [Mus musculus]	Rbm3	mmR118; mmR128	YDSRPGGYGYGYGR	0.10528
Q5SV80	myosin-XIX [Mus musculus]	Myo19	mmR376	RDCLAKLIYAR	0.106046
Q00PI9	heterogeneous nuclear ribonucleoprotein U-like protein 2 [Mus musculus]	Hnrnpul2	dmR682; mmR686	AYGQQYWGQSGNRGGYR	0.106311
Q6NS46	protein RRP5 homolog [Mus musculus]	Pdcd11	dmR1001	TTEPGVTGLILAVEGPASKRTR	0.107108
Q6Y7W8	PERQ amino acid-rich with GYF domain-containing protein 2 isoform a [Mus musculus]	Gigyf2	mmR107; dmR119; dmR121	LTGRGGGGGTVVGAPRGR	0.107387
F6ZDS4	nuclear pore complex-associated protein Tpr [Mus musculus]	Tpr	dmR2179	RQSVGRGLQLTPGIGGMQQHFFDDEDR	0.107733
Q8BMK4	cytoskeleton-associated protein 4 [Mus musculus]	Ckap4	mmR60	KPPAAPQQPQPPAPHPPQHPQNQAHRGGHR	0.10869
Q9D1F5	hypothetical protein LOC68067 [Mus musculus]	No match	mmR53; mmR54	QSFVRAYGEGSGADCRR	0.108775
Q9JIK5	nucleolar RNA helicase 2 [Mus musculus]	Ddx21	mmR818	NFRGQGQR	0.108848
Q8K4P0	WD repeat domain 33 isoform 1 [Mus musculus]	Wdr33	mmR1137	DNFPGPDDFGPEEGFDASDEAARGR; GRDNFPGPDDFGPEEGFDASDEAARGR	0.108898
Q8BQ46	TATA-binding protein-associated factor 2N [Mus musculus]	Taf15	dmR498; mmR505	SRGAYGGDRGGSGSGSGGYGGDR	0.108936
Q8BG05	heterogeneous nuclear ribonucleoprotein A3 isoform a [Mus musculus]	Hnrnpa3	mmR378	SSGSPYGGGYGSGGGSGGYGSRR	0.109503
Q8K4P0	WD repeat domain 33 isoform 1 [Mus musculus]	Wdr33	mmR1139	DNFPGPDDFGPEEGFDASDEAARGR; GRDNFPGPDDFGPEEGFDASDEAARGR	0.109506
Q8VIJ6	splicing factor, proline- and glutamine-rich [Mus musculus]	Sfpq	mmR228	MPGGPKPGGGPGMGAPGGHPKPPHRGGGEPR	0.110021
P35922	fragile X mental retardation protein 1 homolog [Mus musculus]	Fmr1	mmR470; dmR473	GYVTDDGQGMGRGSRPYR	0.110589
O88569	heterogeneous nuclear ribonucleoproteins A2/B1 isoform 1 [Mus musculus]	Hnrnpa2b1	dmR213; mmR228	GGNFGFGDSRGGGGNFGPGPGSNFRGGSDGYGSGR; GGNFGFGDSRGGGGNFGPGPGSNFR	0.110754
A2A4U6	zinc finger protein 334 [Mus musculus]	Zfp334	mmR256	STLIVHLR	0.111499
Q6NZJ6	eukaryotic translation initiation factor 4 gamma 1 isoform a [Mus musculus]	Eif4g1	mmR1036	RGGPPGPPINR	0.112084
D4AFX7	DnaJ (Hsp40) homolog, subfamily C, member 13 [Mus musculus]	Dnajc13	mmR727; dmR729	EKVDLVLMHWRDR	0.112249
A2AG50	MAP7 domain-containing protein 2 [Mus musculus]	Map7d2	dmR148; mmR154; mmR155	EEEERLEAMMRR	0.115317
Q8BG05	heterogeneous nuclear ribonucleoprotein A3 isoform a [Mus musculus]; PREDICTED: heterogeneous nuclear ribonucleoprotein A3-like isoform 16 [Mus musculus]	Hnrnpa3	mmR377	SSGSPYGGGYGSGGGSGGYGSRR; SSGSPYGGGYGSGGGSGGYGSR	0.115429
Q8BJS4	SUN domain-containing protein 2 isoform 3 [Mus musculus]	Sun2	mmR110	SALLDDHLHSEPYWSGDLRGR	0.115695
Q8BJS4	SUN domain-containing protein 2 isoform 3 [Mus musculus]	Sun2	mmR112	SALLDDHLHSEPYWSGDLRGR	0.115695
Q6NZJ6	eukaryotic translation initiation factor 4 gamma 1 isoform a [Mus musculus]	Eif4g1	mmR689	GPPRGGPGGELPR	0.117557
P97376	protein FRG1 [Mus musculus]	Frg1	mmR128	IALKSGYGKYLGINSDGLVVGR	0.118195
Q9JIK5	nucleolar RNA helicase 2 [Mus musculus]	Ddx21	mmR804	DGSRGAFR	0.120024
Q3UVL4	protein fat-free homolog [Mus musculus]	Vps51	mmR30	MAAAAAVGPGLGSGPGDSPEGPEADAPERR	0.120425
Q8VDZ4	probable palmitoyltransferase ZDHHC5 [Mus musculus]	Zdhhc5	mmR697	SIGSASPGPGQPPLSSPTRGGVK	0.120795
Q8K4B0	metastasis-associated protein MTA1 [Mus musculus]	Mta1	mmR604	LLMPSRGLANHGQTR	0.121132
Q00PI9	heterogeneous nuclear ribonucleoprotein U-like protein 2 [Mus musculus]	Hnrnpul2	mmR718	QYNRDWQNYYYHHQQDR	0.121402
O89086	putative RNA-binding protein 3 isoform 2 [Mus musculus]	Rbm3	dmR118; mmR128	YDSRPGGYGYGYGR	0.121552
Q14AX6	cyclin-dependent kinase 12 isoform 1 [Mus musculus]	Cdk12	dmR1467; mmR1471	LQNYGELGPGTTGANSSGTTLQWGGPAQSYGKPYRGAAR	0.121831
Q9Z1Y4	thyroid receptor-interacting protein 6 [Mus musculus]	Trip6	dmR190; mmR218	RGASQASGPLPGPHFPLTGRGEVWGAGYR	0.122908
Q69Z38	pseudopodium-enriched atypical kinase 1 [Mus musculus]	Peak1	mmR539	YQEVWTSSTSPR	0.123383
S4R1M9	oxysterol-binding protein-related protein 10 [Mus musculus]	Osbpl10	dmR581	SKFMGMSVGVSMIGEGVLR	0.124495
O08664	B-cell CLL/lymphoma 7 protein family member C [Mus musculus]	Bcl7c	mmR82	GTSPRGGGPLILLDLNDENSNQSFHSEGSLQK	0.126364
Q9QZR0	E3 ubiquitin-protein ligase RNF25 [Mus musculus]	Rnf25	mmR440	TPGSCYPHLPRGQGAYR	0.129294
Q811B5	proline-rich protein 3 isoform a [Mus musculus]	Prr3	mmR136	LRSWSLVK	0.130089
Q8VEK3	heterogeneous nuclear ribonucleoprotein U [Mus musculus]	Hnrnpu	dmR709; dmR715; mmR730	RGNMPQRGGGGGSGGIGYPYPR	0.130917
Q60749	KH domain-containing, RNA-binding, signal transduction-associated protein 1 [Mus musculus]	Khdrbs1	mmR325; dmR331	GSITRGATVTRGVPPPPTVR	0.132004
P70333	heterogeneous nuclear ribonucleoprotein H2 [Mus musculus]	Hnrnph2	dmR233; mmR262	RGAYGGGYGGYDDYGGYNDGYGFGSDRFGR	0.135442
Q8BMK4	cytoskeleton-associated protein 4 [Mus musculus]	Ckap4	mmR64	KPPAAPQQPQPPAPHPPQHPQNQAHRGGHR	0.135655
Q69ZK6	probable JmjC domain-containing histone demethylation protein 2C isoform 1 [Mus musculus]	Jmjd1c	mmR995	SDCRSPTHLTVSSTNALR	0.135944
Q80WC1	ubinuclein-2 [Mus musculus]	Ubn2	mmR63	DKPLPQREVSR	0.136465
Q8BG05	heterogeneous nuclear ribonucleoprotein A3 isoform a [Mus musculus]	Hnrnpa3	mmR355; mmR378	GGSFGGRSSGSPYGGGYGSGGGSGGYGSRR	0.14084
Q8VHM5	heterogeneous nuclear ribonucleoprotein R [Mus musculus]	Hnrnpr	mmR441	STAYEDYYYHPPPR	0.141352
P61979	heterogeneous nuclear ribonucleoprotein K [Mus musculus]	Hnrnpk	dmR256; dmR258	GRPVGFPMRGRGGFDR	0.143363
P70399	tumor suppressor p53-binding protein 1 [Mus musculus]	Tp53bp1	mmR1340	ASGTEAADFALPSSR; ASGTEAADFALPSSRGGPGK	0.143513
Q91VM5	heterogeneous nuclear ribonucleoprotein G [Mus musculus]	Rbmxl1	mmR122	GPPSRGGYMDDGGYSMNFNMSSSR	0.145188
Q60749	KH domain-containing, RNA-binding, signal transduction-associated protein 1 [Mus musculus]	Khdrbs1	dmR331; mmR346	GATVTRGVPPPPTVRGAPTPR	0.147131
Q8BVE8	probable histone-lysine N-methyltransferase NSD2 isoform 1 [Mus musculus]	Whsc1	mmR212	ESCPNTGRDRDLLLK	0.147988
Q60749	KH domain-containing, RNA-binding, signal transduction-associated protein 1 [Mus musculus]	Khdrbs1	dmR304; dmR310; mmR315	GRGVGPPRGALVR	0.148169
Q9CQ49	nuclear cap-binding protein subunit 2 [Mus musculus]	Ncbp2	mmR146	DEYREDYDAGRGGYGK	0.148506
E9Q5C9	nucleolar and coiled-body phosphoprotein 1 isoform B [Mus musculus]	Nolc1	mmR686	GSYRGGSISVQVNSVK	0.149913
P49312	heterogeneous nuclear ribonucleoprotein A1 isoform a [Mus musculus]	Hnrnpa1	mmR140	IEVIEIMTDRGSGK	0.150564
Q00PI9	heterogeneous nuclear ribonucleoprotein U-like protein 2 [Mus musculus]	Hnrnpul2	mmR682; dmR686	AYGQQYWGQSGNRGGYR	0.152892
Q60749	KH domain-containing, RNA-binding, signal transduction-associated protein 1 [Mus musculus]	Khdrbs1	dmR289; mmR291	GVSVRGRGAAPPPPPVPR	0.153126
O35245	polycystin-2 [Mus musculus]	Pkd2	mmR143	GLGSYRGAAHLSGR	0.153577
Q61545	RNA-binding protein EWS [Mus musculus]	Ewsr1	dmR470; mmR485	GMPPPLRGGPGGPGGPGGPMGR	0.154288
P97855	ras GTPase-activating protein-binding protein 1 [Mus musculus]	G3bp1	mmR445; mmR458	GPPRGGMVQKPGFGVGRGITTPR; GPPRGGMVQKPGFGVGR	0.154806
Q6PB70	anoctamin-8 [Mus musculus]	Ano8	mmR510	TILELAR	0.155336
Q6PGG2	GEM-interacting protein [Mus musculus]	Gmip	dmR829; dmR832	CPEVTPPELATLQRDQREEEVEDTR	0.156214
P97855	ras GTPase-activating protein-binding protein 1 [Mus musculus]	G3bp1	mmR445; mmR464	GPPRGGMVQKPGFGVGRGITTPR	0.156694
Q9CQY2	hypothetical protein LOC67148 [Mus musculus]	Fam103a1	mmR62; mmR65	GNWLQDNRQFR	0.1569
Q9CX86	heterogeneous nuclear ribonucleoprotein A0 [Mus musculus]	Hnrnpa0	mmR286; dmR293	SGGGGGGGGSWGGRSNSGPYRGGYGGGYGGGSF	0.157437
O88508	DNA (cytosine-5)-methyltransferase 3A isoform 1 [Mus musculus]	Dnmt3a	mmR167	LRGGLGWESSLR	0.158907
Q8CBY3	leukocyte receptor cluster member 8 homolog [Mus musculus]	Leng8	mmR368	WEAPSSLHPSR	0.159593
Q8C9B9	death-inducer obliterator 1 isoform 3 [Mus musculus]	Dido1	dmR80; dmR81	VEEFLTTVRR	0.160306
Q6NZJ6	eukaryotic translation initiation factor 4 gamma 1 isoform b [Mus musculus]	Eif4g1	mmR689; mmR698	GPPRGGPGGELPRGPAGLGPR	0.163923
O89001	carboxypeptidase D precursor [Mus musculus]	Cpd	mmR12; dmR15	DERPPWRLGRLR	0.166465
Q9JKB3	DNA-binding protein A long isoform [Mus musculus]	Ybx3	mmR240	FPPYHVGQTFDRR	0.1675
P61979	heterogeneous nuclear ribonucleoprotein K [Mus musculus]	Hnrnpk	mmR316	NLPLPPPPPPR; NLPLPPPPPPRGGDLMAYDR	0.168695
P97855	ras GTPase-activating protein-binding protein 1 [Mus musculus]	G3bp1	mmR433	GPGGPRGGPSGGMR	0.169562
P61979	heterogeneous nuclear ribonucleoprotein K [Mus musculus]	Hnrnpk	mmR325	NLPLPPPPPPRGGDLMAYDR	0.171184
Q9R1C7	pre-mRNA-processing factor 40 homolog A [Mus musculus]	Prpf40a	dmR9	MRPGTGAERGGLMVSEMESQPPSR	0.171844
Q6PGG2	GEM-interacting protein [Mus musculus]	Gmip	mmR873	YSRGGVRPVTHQLSSLALVASK	0.172404
P62960	nuclease-sensitive element-binding protein 1 [Mus musculus]	Ybx1	mmR197	RRFPPYYMR; FPPYYMR; RFPPYYMR	0.17261
A0A087WQ44	PREDICTED: LOW QUALITY PROTEIN: helicase SRCAP [Mus musculus]	Srcap	mmR3265	SSAPPHLCIPTISHR	0.175112
Q9CX86	heterogeneous nuclear ribonucleoprotein A0 [Mus musculus]	Hnrnpa0	dmR286; mmR293	SGGGGGGGGSWGGRSNSGPYRGGYGGGYGGGSF	0.176108
Q8C854	myelin expression factor 2 isoform 1 [Mus musculus]	Myef2	mmR397	MGELYRGAMTSSMER	0.181592
Q8CHY6	transcriptional repressor p66 alpha isoform a [Mus musculus]	Gatad2a	mmR536	GSATAPRGVLHTFSQSPK	0.182556
Q8R0G9	nuclear pore complex protein Nup133 [Mus musculus]	Nup133	dmR17; mmR30	RGPLVGIGPTSTPR	0.183597
Q8BG05	heterogeneous nuclear ribonucleoprotein A3 isoform a [Mus musculus]	Hnrnpa3	dmR378	SSGSPYGGGYGSGGGSGGYGSRRF	0.186593
Q91VJ5	polyglutamine-binding protein 1 [Mus musculus]	Pqbp1	mmR10	PLPVALQTR	0.187162
Q60749	KH domain-containing, RNA-binding, signal transduction-associated protein 1 [Mus musculus]	Khdrbs1	mmR331; mmR340	GATVTRGVPPPPTVR	0.187271
Q3TLH4	protein PRRC2C [Mus musculus]	Prrc2c	mmR1159; dmR1161	DRDWFPDQGYRGR	0.188161
Q6PGG2	GEM-interacting protein [Mus musculus]	Gmip	mmR877	YSRGGVRPVTHQLSSLALVASK	0.190174
Q9JKB3	DNA-binding protein A short isoform [Mus musculus]	Ybx3	mmR161; mmR166	GAEAANVTGPDGVPVEGSRYAADRR	0.190724
Q8C0J6	ankyrin repeat domain-containing protein 57 [Mus musculus]	Sowahc	mmR395	NLVGALDEDDGDSPAARGGGR	0.191224
Q8C0J6	ankyrin repeat domain-containing protein 57 [Mus musculus]	Sowahc	mmR399	NLVGALDEDDGDSPAARGGGR	0.191224
Q67FY2	B-cell CLL/lymphoma 9-like protein [Mus musculus]	Bcl9l	mmR909	LSHMPLPPASNPPGSVHLASNRGLGR	0.191479
Q70FJ1	A-kinase anchor protein 9 [Mus musculus]	Akap9	dmR2084	TDRCSELLLSKEQLQR	0.191687
O35295	transcriptional activator protein Pur-beta [Mus musculus]	Purb	mmR164	QTVNRGGGGFGGGPGPGGLQSGQTIALPAQGLIEFR	0.194938
Q8R311	cutaneous T-cell lymphoma-associated antigen 5 homolog isoform 1 [Mus musculus]	Ctage5	mmR510	EHSPYGPSPLGRPPSETR	0.200673
Q8BL06	inactive ubiquitin carboxyl-terminal hydrolase 54 [Mus musculus]	Usp54	mmR12	NYFSGSRGSVQGMFAPR	0.200793
Q9WV02	RNA binding motif protein, X-linked [Mus musculus]	Rbmx	mmR125	GPPSRGGHMDDGGYSMNFTMSSSR	0.20221
Q61656	probable ATP-dependent RNA helicase DDX5 [Mus musculus]	Ddx5	mmR478	LLQLVEDRGSGR	0.202514
Q8K1C0	protein angel homolog 2 isoform 1 [Mus musculus]	Angel2	dmR56; mmR63	HISSCLRWPGHYSR	0.204201
Q8C5K5	hypothetical protein LOC69155 [Mus musculus]	No match	mmR61	GLLAAVPGLGPHATCRGGSR	0.205735
Q8K4P0	WD repeat domain 33 isoform 1 [Mus musculus]	Wdr33	dmR1299; mmR1302	DEPFGGPPGSSSSSRGAR	0.207397
Q9CY57	Friend of PRMT1 protein [Mus musculus]	Chtop	dmR98	LGRPIGALARGAIGGR	0.210883
Q7TSC1	protein PRRC2A isoform 1 [Mus musculus]	Prrc2a	mmR2040; mmR2048	VLPSPARPFAPSLGR	0.211682
Q99JX7	nuclear RNA export factor 1 [Mus musculus]	Nxf1	mmR41	SGRGGSGVQSSR	0.212384
O35638	cohesin subunit SA-2 [Mus musculus]	Stag2	dmR541	QAAECHPPVGRGTGKR	0.213965
Q60749	KH domain-containing, RNA-binding, signal transduction-associated protein 1 [Mus musculus]	Khdrbs1	mmR331; dmR340; mmR346	GATVTRGVPPPPTVRGAPTPR	0.214085
Q91VM5	heterogeneous nuclear ribonucleoprotein G [Mus musculus]	Rbmxl1	dmR378; mmR385	GGSRSDRGGGR	0.214759
Q61026	nuclear receptor coactivator 2 isoform a [Mus musculus]	Ncoa2	mmR864; mmR874; mmR880	AALRMSQSTFNNPRPGQLGR	0.218328
Q3TLH4	protein PRRC2C [Mus musculus]	Prrc2c	mmR1161	DRDWFPDQGYRGR; DWFPDQGYRGR	0.218436
Q80UY2	E3 ubiquitin-protein ligase KCMF1 [Mus musculus]	Kcmf1	dmR159; mmR165	MFHPGRGLGGPR	0.222007
Q62167	ATP-dependent RNA helicase DDX3X [Mus musculus]	Ddx3x	mmR632	SGGGGHGGSRGFGGGGYGGFYNSDGYGGNYNSQGVDWWGN	0.223785
A2ASS6	titin isoform N2-A [Mus musculus]	Ttn	dmR9946	EKEAVYEREEAVYEK	0.227335
Q60749	KH domain-containing, RNA-binding, signal transduction-associated protein 1 [Mus musculus]	Khdrbs1	mmR304; dmR310; mmR315	GRGVGPPRGALVR	0.229463
Q8C1A5	thimet oligopeptidase [Mus musculus]	Thop1	mmR121	QDVYQR	0.230452
Q8CFX1	GDH/6PGL endoplasmic bifunctional protein [Mus musculus]	H6pd	mmR747	VAVLVMGR	0.230988
Q6PCL9	poly(A) polymerase gamma [Mus musculus]	Papolg	mmR188	LAIQTISDNLDLRDDSR	0.23119
Q9CY57	Friend of PRMT1 protein [Mus musculus]	Chtop	dmR98; mmR104	LGRPIGALARGAIGGR	0.232149
Q9R1C7	pre-mRNA-processing factor 40 homolog A [Mus musculus]	Prpf40a	mmR2; mmR9	MRPGTGAERGGLMVSEMESQPPSR	0.2329
O88569	heterogeneous nuclear ribonucleoproteins A2/B1 isoform 2 [Mus musculus]; heterogeneous nuclear ribonucleoproteins A2/B1 isoform 1 [Mus musculus]	Hnrnpa2b1	dmR213	SGRGGNFGFGDSRGGGGNFGPGPGSNFR; GGNFGFGDSRGGGGNFGPGPGSNFR	0.233652
P49312	heterogeneous nuclear ribonucleoprotein A1 isoform b [Mus musculus]; heterogeneous nuclear ribonucleoprotein A1 isoform a [Mus musculus]	Hnrnpa1	mmR300	SSGPYGGGGQYFAKPRNQGGYGGSSSSSSYGSGR; SSGPYGGGGQYFAKPR	0.236982
O88545	COP9 signalosome complex subunit 6 [Mus musculus]	Cops6	mmR320	MRGLFF	0.237131
Q9D2D7	zinc finger protein 687 [Mus musculus]	Znf687	mmR1061	HGLPLGTQSSGRGGSLAR	0.241848
P58854	gamma-tubulin complex component 3 [Mus musculus]	Tubgcp3	mmR67	READAALFSELHRK	0.24199
Q99KE1	PREDICTED: NAD-dependent malic enzyme, mitochondrial-like [Mus musculus]	Me2	dmR140	GLFISISDR	0.242809
Q9WUK2	eukaryotic translation initiation factor 4H [Mus musculus]	Eif4h	mmR191	DGPPLRGSNMDFR; FRDGPPLRGSNMDFR	0.250597
O88569	heterogeneous nuclear ribonucleoproteins A2/B1 isoform 2 [Mus musculus]; heterogeneous nuclear ribonucleoproteins A2/B1 isoform 1 [Mus musculus]	Hnrnpa2b1	mmR325	SGNFGGSRNMGGPYGGGNYGPGGSGGSGGYGGR	0.252863
Q61584	fragile X mental retardation syndrome-related protein 1 isoform 1 [Mus musculus]	Fxr1	mmR420	RGPNYTSGYGTNSELSNPSETESER	0.253901
P35550	rRNA 2'-O-methyltransferase fibrillarin [Mus musculus]	Fbl	dmR31; dmR38	GGRGGFGGGRGGFGGGGR	0.254312
Q921F2	TAR DNA-binding protein 43 isoform 1 [Mus musculus]	Tardbp	mmR293	FGGNPGGFGNQGGFGNSR	0.255255
Q91YD9	neural Wiskott-Aldrich syndrome protein isoform 1 [Mus musculus]	Wasl	mmR271; mmR281	RQAPPPPPPSR	0.256441
Q9D2D7	zinc finger protein 687 [Mus musculus]	Znf687	dmR1061; mmR1067	HGLPLGTQSSGRGGSLARGSGGR	0.257661
Q3U0V1	far upstream element-binding protein 2 [Mus musculus]	Khsrp	mmR443	CGLVIGR; CGLVIGRGGENVK	0.264174
Q61768	kinesin-1 heavy chain [Mus musculus]	Kif5b	mmR956	GGGSFVQNNQPVGLRGGGGK	0.265454
O35492	dual specificity protein kinase CLK3 [Mus musculus]	Clk3	mmR43	WVPPLGPEPSSDRGR	0.265992
Q60597	2-oxoglutarate dehydrogenase, mitochondrial precursor [Mus musculus]	Ogdh	dmR883	TSFDEMLPGTHFQR	0.267866
Q9CQ25	mitotic-spindle organizing protein 2 [Mus musculus]	Mzt2	mmR111	NRGGPILGNVTISAER	0.269105
Q9CR25	diphthamide biosynthesis protein 2 [Mus musculus]	Dph2	mmR477	RGIAIAYEDEGSS	0.269286
Q8C1D8	protein IWS1 homolog [Mus musculus]	Iws1	dmR654; mmR662; mmR663	EQRDLEQMPQRR	0.270749
E9Q8X5	zinc finger and BTB domain containing 10 [Mus musculus]	Zbtb10	dmR121; mmR135	TLAFRGGGGGGLGNNGSSR	0.272198
Q5SFM8	RNA-binding protein 27 [Mus musculus]	Rbm27	mmR944	LGILPVGR	0.277483
Q91V09	WD repeat-containing protein 13 isoform 1 [Mus musculus]	Wdr13	mmR114	SVSRGSYQLQAQMNR	0.27774
O88291	zinc finger protein 326 [Mus musculus]	Znf326	mmR149	LRPGFMEDRGR	0.27782
Q62407	striated muscle-specific serine/threonine-protein kinase isoform 2 [Mus musculus]	Speg	dmR1706	KPTVCESETRTYMR	0.281449
Q9CX86	heterogeneous nuclear ribonucleoprotein A0 [Mus musculus]	Hnrnpa0	dmR293	SNSGPYRGGYGGGYGGGSF	0.285811
D3Z3N4	heterogeneous nuclear ribonucleoprotein H3 [Mus musculus]	Hnrnph3	mmR323; mmR343	MGMGNSYSGGYGAPDGLGGYGRGGGGSGGYYGQGGMSGGGWRGMY	0.28713
O88569	heterogeneous nuclear ribonucleoproteins A2/B1 isoform 2 [Mus musculus]; heterogeneous nuclear ribonucleoproteins A2/B1 isoform 1 [Mus musculus]	Hnrnpa2b1	mmR350	NMGGPYGGGNYGPGGSGGSGGYGGRSR; NMGGPYGGGNYGPGGSGGSGGYGGR; NMGGPYGGGNYGPGGSGGSGGYGGRSRY	0.288611
Q60749	KH domain-containing, RNA-binding, signal transduction-associated protein 1 [Mus musculus]	Khdrbs1	mmR304; dmR310	GRGVGPPRGALVR	0.294607
Q00PI9	heterogeneous nuclear ribonucleoprotein U-like protein 2 [Mus musculus]	Hnrnpul2	dmR682	AYGQQYWGQSGNRGGYR	0.297568
Q00PI9	heterogeneous nuclear ribonucleoprotein U-like protein 2 [Mus musculus]	Hnrnpul2	mmR682; mmR686	AYGQQYWGQSGNRGGYR	0.302338
Q3UHH1	hypothetical protein LOC268721 [Mus musculus]	Zswim8	mmR1164	RPLRGGWAPTSWGR	0.303427
S4R1M9	oxysterol-binding protein-related protein 10 [Mus musculus]	Osbpl10	mmR222	HLSTGAPGVVSVTR	0.305115
Q9QZR0	E3 ubiquitin-protein ligase RNF25 [Mus musculus]	Rnf25	mmR434	TPGSCYPHLPRGQGAYR; TPGSCYPHLPR	0.308644
P62274	40S ribosomal protein S29 [Mus musculus]	Rps29	mmR12	GHQQLYWSHPRK; GHQQLYWSHPR	0.312517
Q8BS90	protein aurora borealis [Mus musculus]	Bora	mmR316	LRGGPQCLSSLVR	0.316721
Q9CQY2	hypothetical protein LOC67148 [Mus musculus]	Fam103a1	mmR65	GNWLQDNRQFR	0.31804
Q9CQY2	hypothetical protein LOC67148 [Mus musculus]	Fam103a1	mmR62	GNWLQDNRQFR	0.31804
Q8CHY6	transcriptional repressor p66 alpha isoform a [Mus musculus]	Gatad2a	mmR529	VWNNGSSLQASSQLSRGSATAPR; VWNNGSSLQASSQLSR	0.318184
Q8BGC0	HIV Tat-specific factor 1 homolog [Mus musculus]	Htatsf1	mmR381	GWEAFLNAPEASR	0.31829
Q3U0V1	far upstream element-binding protein 2 [Mus musculus]	Khsrp	mmR412; dmR416	SGPPGPPGAPGMPPGGRGRGR	0.320879
Q8BZ32	putative Polycomb group protein ASXL2 [Mus musculus]	Asxl2	mmR592	ISPMLFSTSQVSPR	0.322437
Q60668	heterogeneous nuclear ribonucleoprotein D0 isoform a [Mus musculus]; heterogeneous nuclear ribonucleoprotein D0 isoform c [Mus musculus]	Hnrnpd	mmR272; dmR278	EQYQQQQQWGSRGGFAGR; EQYQQQQQWGSRGGFAGRAR	0.325567
Q8CCS6	polyadenylate-binding protein 2 [Mus musculus]	Pabpn1	mmR17	AAAAAAAAAAGAAGGRGSGPGR	0.325657
Q62093	serine/arginine-rich splicing factor 2 [Mus musculus]	Srsf2	mmR55	ESRGFAFVR	0.327459
Q60668	heterogeneous nuclear ribonucleoprotein D0 isoform a [Mus musculus]; heterogeneous nuclear ribonucleoprotein D0 isoform c [Mus musculus]	Hnrnpd	dmR272; mmR278	EQYQQQQQWGSRGGFAGR	0.327703
O88842	FYVE, RhoGEF and PH domain-containing protein 3 [Mus musculus]	Fgd3	mmR44	LQALPIGPGAHR; LQALPIGPGAHRGAHSSSAPAGDSSTR	0.329109
P20152	vimentin [Mus musculus]	Vim	mmR64	SLYSSSPGGAYVTR	0.332865
D3YXK2	scaffold attachment factor B [Mus musculus]	Safb	dmR890; dmR896; mmR906	SMSGHSGPGHMMNRGGMSGRGSFAPGGASR	0.334979
Q9WU42	nuclear receptor corepressor 2 [Mus musculus]	Ncor2	dmR1854; mmR1857	GVVTSVEPGTPTVLRWAR	0.335003
P37804	transgelin [Mus musculus]	Tagln	mmR183	HVIGLQMGSNRGASQAGMTGYGRPR	0.335694
Q60749	KH domain-containing, RNA-binding, signal transduction-associated protein 1 [Mus musculus]	Khdrbs1	mmR331	GATVTRGVPPPPTVR	0.336631
Q9Z1Y4	thyroid receptor-interacting protein 6 [Mus musculus]	Trip6	mmR190; mmR209	RGASQASGPLPGPHFPLTGRGEVWGAGYR	0.336656
Q60749	KH domain-containing, RNA-binding, signal transduction-associated protein 1 [Mus musculus]	Khdrbs1	dmR289; dmR291; mmR302	GVSVRGRGAAPPPPPVPR	0.339358
Q60749	KH domain-containing, RNA-binding, signal transduction-associated protein 1 [Mus musculus]	Khdrbs1	mmR325; mmR331	GSITRGATVTRGVPPPPTVR	0.340653
Q8BP71	RNA binding protein fox-1 homolog 2 isoform 1 [Mus musculus]	Rbfox2	mmR440	VYTADPYHALAPAASYGVGAVASLYRGGYSR; VYTADPYHALAPAASYGVGAVASLYR	0.341603
P62281	40S ribosomal protein S11 [Mus musculus]	Rps11	mmR69	CPFTGNVSIR; CPFTGNVSIRGR	0.34463
P60879	synaptosomal-associated protein 25 [Mus musculus]	Snap25	dmR124; dmR135	VVDEREQMAISGGFIR	0.345771
A2CG49	kalirin isoform 1 [Mus musculus]	Kalrn	dmR2217; dmR2223	ERSTAVIR	0.347451
Q6NXJ0	protein WWC2 [Mus musculus]	Wwc2	dmR1050	VKRAVCQPTLR	0.350428
Q99MR6	serrate RNA effector molecule homolog isoform 1 [Mus musculus]	Srrt	mmR839	GNYDAFRGQGGYPGKPR	0.351773
Q6DID3	protein SCAF8 [Mus musculus]	Scaf8	mmR1136	SGPWNRGFGQEVHR	0.37473
P49312	heterogeneous nuclear ribonucleoprotein A1 isoform a [Mus musculus]	Hnrnpa1	dmR206; mmR218; dmR225	SGSGNFGGGRGGGFGGNDNFGRGGNFSGR	0.374744
Q8VCE9	pleckstrin homology domain-containing family H member 3 precursor [Mus musculus]	Plekhh3	mmR54	TPSPAGGGRGSLDVTLTQPTR	0.375332
Q8R0G9	nuclear pore complex protein Nup133 [Mus musculus]	Nup133	mmR34	RGLSLGSAVNSPVLFSPAGR	0.378704
Q6PDM2	serine/arginine-rich splicing factor 1 isoform 1 [Mus musculus]	Srsf1	mmR97	GTGRGGGGGGGGGAPR	0.382584
Q569Z6	thyroid hormone receptor-associated protein 3 [Mus musculus]	Thrap3	mmR115	SNWQNYRQAYSPR	0.389293
O88569	heterogeneous nuclear ribonucleoproteins A2/B1 isoform 2 [Mus musculus]; heterogeneous nuclear ribonucleoproteins A2/B1 isoform 1 [Mus musculus]	Hnrnpa2b1	mmR203	SGRGGNFGFGDSR	0.389487
Q60865	caprin-1 isoform a [Mus musculus]	Caprin1	mmR631	GPANGFRGGYDGYRPSFSNTPNSGYSQSQFTAPR	0.390624
Q9CY57	Friend of PRMT1 protein [Mus musculus]	Chtop	dmR129; mmR135	TLLRGGMSLR	0.392447
Q80W00	serine/threonine-protein phosphatase 1 regulatory subunit 10 isoform 2 [Mus musculus]	Ppp1r10	mmR688	GGDPFWDGPGDPMR; GGDPFWDGPGDPMRGGPMR	0.39355
Q8VEK3	heterogeneous nuclear ribonucleoprotein U [Mus musculus]	Hnrnpu	dmR709; dmR715	RGNMPQRGGGGGSGGIGYPYPR	0.40027
Q8K1C0	protein angel homolog 2 isoform 1 [Mus musculus]	Angel2	mmR72	APYPYFSSR	0.402082
O89086	putative RNA-binding protein 3 isoform 1 [Mus musculus]	Rbm3	mmR47	SRGFGFITFTNPEHASDAMR	0.404306
Q61545	RNA-binding protein EWS [Mus musculus]	Ewsr1	mmR470	GMPPPLRGGPGGPGGPGGPMGR	0.411276
Q8K1I7	WAS/WASL-interacting protein family member 1 [Mus musculus]	Wipf1	mmR135	DNDSGGSRPPILPPGGR	0.41351
D3YXK2	scaffold attachment factor B [Mus musculus]	Safb	dmR912; mmR924	GHVIPRGGMQAGFGGQSR	0.41605
Q7TSC1	protein PRRC2A isoform 1 [Mus musculus]	Prrc2a	mmR232	LHHGHDPRGGLQPSGPPQFPPYR	0.419285
P49312	heterogeneous nuclear ribonucleoprotein A1 isoform b [Mus musculus]; heterogeneous nuclear ribonucleoprotein A1 isoform a [Mus musculus]	Hnrnpa1	mmR284	GGNFGGRSSGPYGGGGQYFAKPR	0.426489
Q8CC12	codanin-1 [Mus musculus]	Cdan1	mmR135	GGRGSGAAEEGASGESPPWAGGR	0.429343
Q9JIX8	apoptotic chromatin condensation inducer in the nucleus isoform 2 [Mus musculus]	Acin1	mmR21	GILSGNRGVDYGSGR	0.438264
Q3U0V1	far upstream element-binding protein 2 [Mus musculus]	Khsrp	mmR412; mmR414; mmR416	SGPPGPPGAPGMPPGGRGRGR	0.446734
Q99NH0	ankyrin repeat domain-containing protein 17 isoform b [Mus musculus]	Ankrd17	mmR1739	VIGRGGCNINAIR	0.454766
Q8CBY1	protein Smaug homolog 1 isoform 2 [Mus musculus]	Samd4a	mmR566	NRGFGQSNSLPTASSVGSGMGR	0.455208
Q5PRE5	hypothetical protein LOC212127 [Mus musculus]	Proser1	mmR624	GTLGLSGALGR	0.455787
P49312	heterogeneous nuclear ribonucleoprotein A1 isoform b [Mus musculus]; heterogeneous nuclear ribonucleoprotein A1 isoform a [Mus musculus]	Hnrnpa1	dmR206; mmR218	SGSGNFGGGRGGGFGGNDNFGR; SGSGNFGGGRGGGFGGNDNFGRGGNFSGR	0.458621
Q99020	heterogeneous nuclear ribonucleoprotein A/B isoform 2 [Mus musculus]	Hnrnpab	mmR275	RGGHQNNYKPY	0.460773
Q9CY57	Friend of PRMT1 protein [Mus musculus]	Chtop	mmR104; mmR111	GAIGGRGLPIIQR	0.4635
Q8VCE9	pleckstrin homology domain-containing family H member 3 precursor [Mus musculus]	Plekhh3	mmR553	DFSPRGPLPLLDR	0.463601
Q8K1I7	WAS/WASL-interacting protein family member 1 [Mus musculus]	Wipf1	mmR169	NRMPPPRPDVGSKPDSLPPPVPNTPRPVPSSLHNR	0.469503
Q9DBR0	A-kinase anchor protein 8 [Mus musculus]	Akap8	mmR188	GSLDGFLRGR; GSLDGFLR	0.471486
O08550	histone-lysine N-methyltransferase MLL4 [Mus musculus]	Kmt2b	mmR298	GRGGLPLMIK	0.476158
O08550	histone-lysine N-methyltransferase MLL4 [Mus musculus]	Kmt2b	mmR49	RGGGAAGPGGAEPGEDTALLR	0.477502
Q569Z6	thyroid hormone receptor-associated protein 3 [Mus musculus]	Thrap3	dmR91; dmR101	NRGFYPWGQYNRGGYGNYR	0.479789
Q80U58	pumilio homolog 2 isoform 1 [Mus musculus]	Pum2	mmR694	SASSTSSLFSSSSQLFPPSRLR	0.480217
P49312	heterogeneous nuclear ribonucleoprotein A1 isoform a [Mus musculus]	Hnrnpa1	dmR225; mmR232	GGNFSGRGGFGGSRGGGGYGGSGDGYNGFGNDGSNFGGGGSYNDFGNYNNQSSNFGPMK	0.484694
G3X9Z4	pre-mRNA cleavage complex II protein Pcf11 [Mus musculus]	Pcf11	dmR1073; mmR1085	TGQPGPQRFDGPPGQQVQPR	0.487057
Q61545	RNA-binding protein EWS [Mus musculus]	Ewsr1	mmR470; mmR485	GMPPPLRGGPGGPGGPGGPMGR	0.49059
O08583	THO complex subunit 4 [Mus musculus]	Alyref	mmR196	RPAQSINRGGMTR	0.491401
Q9CW79	Golgin subfamily A member 1 [Mus musculus]	Golga1	mmR754	GSIRPSISNPRIPWS	0.491535
Q8VIJ6	splicing factor, proline- and glutamine-rich [Mus musculus]	Sfpq	dmR25	GGGGGRGGLHDFRSPPPGMGLNQNR	0.492359
O89086	putative RNA-binding protein 3 isoform 2 [Mus musculus]	Rbm3	mmR90; mmR97; mmR99	GSRGGAFGGRGR	0.493176
Q9D9K3	cell death regulator Aven isoform 1 [Mus musculus]	Aven	mmR35	ERPGGDREPVGAATALAR; ERPGGDREPVGAATALARGGCGDGGGR; EPVGAATALARGGCGDGGGR	0.493193
Q8VDM6	heterogeneous nuclear ribonucleoprotein U-like protein 1 isoform 1 [Mus musculus]	Hnrnpul1	mmR645; dmR659	GGFQNRGGGGGSGGGGGNYRGGFNR	0.493566
O88569	heterogeneous nuclear ribonucleoproteins A2/B1 isoform 1 [Mus musculus]	Hnrnpa2b1	mmR266	GFGDGYNGYGGGPGGGNFGGSPGYGGGRGGYGGGGPGYGNQGGGYGGGYDNYGGGNYGSGSYNDFGNYNQQPSNYGPMK; GFGDGYNGYGGGPGGGNFGGSPGYGGGR	0.494604
O35126	atrophin-1 [Mus musculus]	Atn1	mmR1026	VAALGNDPLAR	0.494734
Q60668	heterogeneous nuclear ribonucleoprotein D0 isoform c [Mus musculus]	Hnrnpd	dmR278; mmR280	EQYQQQQQWGSRGGFAGRAR	0.494924
Q9WVA4	transgelin-2 [Mus musculus]	Tagln2	mmR182	NVIGLQMGTNRGASQAGMTGYGMPR	0.495496
P58058	NAD kinase [Mus musculus]	Nadk	mmR39	MNLSQELSADSASYNCSACHGDETWSYNHPIRGR	0.498244
Q7TSC1	protein PRRC2A isoform 1 [Mus musculus]	Prrc2a	dmR281	YPTPDGPSRFPR	0.499379
Q61033	lamina-associated polypeptide 2 isoform alpha [Mus musculus]	Tmpo	dmR85; mmR87	GPPDFSSDEEREPTPVLGSGASVGRGR	0.502033
O89086	putative RNA-binding protein 3 isoform 2 [Mus musculus]	Rbm3	mmR141	DYSGSQGGYDRYSGGNYR	0.502517
P46062	signal-induced proliferation-associated protein 1 [Mus musculus]	Sipa1	mmR11	RGMAPAPTDDLFAR	0.505586
Q8C5Q4	G-rich sequence factor 1 isoform 1 [Mus musculus]	Grsf1	mmR98	LAGPIPARPSAAAAAAASYSALR	0.507245
Q8CHW4	translation initiation factor eIF-2B subunit epsilon [Mus musculus]	Eif2b5	mmR18	RGGGGSGGGGTQGAEEEPPPPLQAVLVADSFNR	0.508394
P35550	rRNA 2'-O-methyltransferase fibrillarin [Mus musculus]	Fbl	dmR31; mmR38; mmR46	GGRGGFGGGRGGFGGGGR	0.508515
Q8VDM6	heterogeneous nuclear ribonucleoprotein U-like protein 1 isoform 1 [Mus musculus]	Hnrnpul1	dmR645; mmR659	GGFQNRGGGGGSGGGGGNYRGGFNR	0.510329
Q80W00	serine/threonine-protein phosphatase 1 regulatory subunit 10 isoform 2 [Mus musculus]	Ppp1r10	mmR722; mmR725	GGNEPPPPPPFRGAR	0.51501
D3Z3N4	heterogeneous nuclear ribonucleoprotein H3 [Mus musculus]	Hnrnph3	mmR343	GGGGSGGYYGQGGMSGGGWRGMY; MGMGNSYSGGYGAPDGLGGYGRGGGGSGGYYGQGGMSGGGWR	0.517216
Q8BTI8	serine/arginine repetitive matrix protein 2 [Mus musculus]	Srrm2	mmR1590	ALPRHSRSGSSSK	0.518094
Q80W00	serine/threonine-protein phosphatase 1 regulatory subunit 10 isoform 2 [Mus musculus]	Ppp1r10	mmR693	GGPMRGGPGPAPGPYHR; GGDPFWDGPGDPMRGGPMR	0.524028
Q8C8U0	liprin-beta-1 isoform 2 [Mus musculus]	Ppfibp1	mmR487	SSFGRGFFK	0.525756
Q9JM73	serum response factor [Mus musculus]	Srf	mmR24	MLPSQAGAAAALGRGSALGGNLNR	0.528722
Q60668	heterogeneous nuclear ribonucleoprotein D0 isoform a [Mus musculus]; heterogeneous nuclear ribonucleoprotein D0 isoform c [Mus musculus]	Hnrnpd	mmR272; dmR278; dmR280	EQYQQQQQWGSRGGFAGRAR	0.532147
P35569	insulin receptor substrate 1 [Mus musculus]	Irs1	mmR280	SQSSSSCSNPISVPLRR	0.533723
Q8BQ89	LIX1-like protein [Mus musculus]	Lix1l	mmR18	LQPGVGVGGRGTLR	0.540392
P97868	E3 ubiquitin-protein ligase RBBP6 isoform 1 [Mus musculus]	Rbbp6	mmR523	LGYLVSPPQQIRR	0.544693
Q8BG05	heterogeneous nuclear ribonucleoprotein A3 isoform a [Mus musculus]; PREDICTED: heterogeneous nuclear ribonucleoprotein A3-like isoform 16 [Mus musculus]	Hnrnpa3	mmR355	GGSFGGRSSGSPYGGGYGSGGGSGGYGSR	0.545314
Q8R3P2	protein deltex-2 [Mus musculus]	Dtx2	mmR255	TTTVSGAHQAFAPYNKPSLSGAR	0.548278
E9Q8X5	zinc finger and BTB domain containing 10 [Mus musculus]	Zbtb10	mmR121; mmR135	TLAFRGGGGGGLGNNGSSR	0.55692
P56959	RNA-binding protein FUS [Mus musculus]	Fus	mmR387; mmR400	GGPMGRGGYGGGGSGGGGRGGFPSGGGGGGGQQR	0.56197
Q9WTX6	cullin-1 [Mus musculus]	Cul1	mmR63	YMELYTHVYNYCTSVHQSNQAR	0.562476
D3Z2H9	tropomyosin alpha-3 chain [Mus musculus]	Tpm3-rs7	mmR142	LVIIEGDLER	0.564359
Q8K4P0	WD repeat domain 33 isoform 1 [Mus musculus]	Wdr33	mmR1040	RGGPGPPFPPDHR	0.568726
Q8BQ89	LIX1-like protein [Mus musculus]	Lix1l	dmR22	LQPGVGVGGRGTLR	0.569296
Q80YR7	claspin [Mus musculus]	Clspn	mmR773	QIGRGASFLPTAGFR	0.573047
Q8C854	myelin expression factor 2 isoform 1 [Mus musculus]	Myef2	mmR417	GDIGLSRGFGDSFGR	0.580661
Q3U0V1	far upstream element-binding protein 2 [Mus musculus]	Khsrp	dmR412; mmR414	SGPPGPPGAPGMPPGGRGRGR	0.58355
Q6DFV5	probable helicase with zinc finger domain [Mus musculus]	Helz	mmR1245	IITHQAAMAYNMNLLHTHGR	0.585401
Q8BG05	heterogeneous nuclear ribonucleoprotein A3 isoform a [Mus musculus]	Hnrnpa3	dmR216; dmR226; mmR239	GRGGGSGNFMGRGGNFGGGGGNFGR	0.586292
P29341	polyadenylate-binding protein 1 [Mus musculus]	Pabpc1	mmR481; mmR493	VMSTQRVANTSTQTMGPRPAAAAAAATPAVR	0.589066
Q8BRH4	histone-lysine N-methyltransferase MLL3 [Mus musculus]	Kmt2c	dmR2588; mmR2595	HGNFLPRPDFPGPR	0.590483
Q3U0V1	far upstream element-binding protein 2 [Mus musculus]	Khsrp	dmR414; mmR416	SGPPGPPGAPGMPPGGRGRGR; GRGRGQGNWGPPGGEMTFSIPTHK	0.591989
Q8R311	cutaneous T-cell lymphoma-associated antigen 5 homolog isoform 1 [Mus musculus]	Ctage5	mmR665	DNLGNSNVPDSPIPAECEAAGR	0.595085
P53996	cellular nucleic acid-binding protein isoform 1 [Mus musculus]	Cnbp	mmR80	DCDLQEDEACYNCGRGGHIAK	0.596288
Q99PP7	E3 ubiquitin-protein ligase TRIM33 isoform 1 [Mus musculus]	Trim33	mmR571	LQQPPAPIPTTTATTQQHPR	0.600494
E9Q2I4	hypothetical protein LOC238317 [Mus musculus]	Elmsan1	mmR112	WPSSVMAPGRGLER	0.603004
Q5F2E7	nuclear fragile X mental retardation-interacting protein 2 [Mus musculus]	Nufip2	mmR291	YETGPGGTSRGKPAMGDVLR	0.603432
Q8BTW9	serine/threonine-protein kinase PAK 4 [Mus musculus]	Pak4	mmR253	ARGAPSPGVLGPHASEPQLAPPAR	0.60606
Q6PDL0	cytoplasmic dynein 1 light intermediate chain 2 [Mus musculus]	Dync1li2	mmR397	TQGRGGPASVPSASPGTSVK	0.61006
Q8CHI8	E1A-binding protein p400 isoform 1 [Mus musculus]; E1A-binding protein p400 isoform 2 [Mus musculus]	Ep400	mmR1486	TVAFPSTHPPRMANTNTSTATPQGQVR; TVAFPSTHPPR	0.612985
Q8BX10	serine/threonine-protein phosphatase PGAM5, mitochondrial isoform 2 [Mus musculus]	Pgam5	mmR54	AGRGVWDTNWDR	0.613898
P97855	ras GTPase-activating protein-binding protein 1 [Mus musculus]	G3bp1	mmR445; dmR458	GPPRGGMVQKPGFGVGRGITTPR; GPPRGGMVQKPGFGVGR	0.618811
Q6NZJ6	eukaryotic translation initiation factor 4 gamma 1 isoform a [Mus musculus]	Eif4g1	mmR706	GGPGGELPRGPAGLGPR	0.620508
Q6NZJ6	eukaryotic translation initiation factor 4 gamma 1 isoform a [Mus musculus]	Eif4g1	mmR698	GGPGGELPRGPAGLGPR	0.620508
O88532	zinc finger RNA-binding protein [Mus musculus]	Zfr	mmR147	QQEAPPPPPPATTQNYQDSYSYVR	0.620549
E9Q2I4	hypothetical protein LOC238317 [Mus musculus]	Elmsan1	mmR108	WPSSVMAPGRGLER	0.621614
Q9CQ25	mitotic-spindle organizing protein 2 [Mus musculus]	Mzt2	mmR109	LASDPQDSVPISLSTSTSETRGR	0.624606
Q9R1C7	pre-mRNA-processing factor 40 homolog A [Mus musculus]	Prpf40a	dmR2; dmR9	MRPGTGAERGGLMVSEMESQPPSR	0.631911
Q99L04	dehydrogenase/reductase SDR family member 1 [Mus musculus]	Dhrs1	mmR21	GIGRGIALQLCK	0.637005
Q99020	heterogeneous nuclear ribonucleoprotein A/B isoform 2 [Mus musculus]	Hnrnpab	mmR250	EVYQQQQYGSGGRGNR	0.640239
O89086	putative RNA-binding protein 3 isoform 2 [Mus musculus]	Rbm3	dmR90; dmR97; mmR99	GSRGGAFGGRGR	0.643999
Q68FD9	hypothetical protein LOC330286 [Mus musculus]	Kiaa1549	mmR1834	IGAQPVEIPAGR	0.645054
P06537	glucocorticoid receptor [Mus musculus]	Nr3c1	mmR22	ESLAPPGRDEVPSSLLGR; DEVPSSLLGR	0.646212
P56959	RNA-binding protein FUS [Mus musculus]	Fus	mmR466	APKPDGPGGGPGGSHMGGNYGDDRR	0.64768
Q99020	heterogeneous nuclear ribonucleoprotein A/B isoform 2 [Mus musculus]	Hnrnpab	mmR253	EVYQQQQYGSGGRGNR	0.648363
Q5PRE5	hypothetical protein LOC212127 [Mus musculus]	Proser1	mmR613; mmR624	GPAHPGTPVRGTLGLSGALGR	0.65235
P56959	RNA-binding protein FUS [Mus musculus]	Fus	mmR465	APKPDGPGGGPGGSHMGGNYGDDRR	0.653873
O89086	putative RNA-binding protein 3 isoform 1 [Mus musculus]; putative RNA-binding protein 3 isoform 2 [Mus musculus]; PREDICTED: putative RNA-binding protein 3-like [Mus musculus]	Rbm3	mmR128	YDSRPGGYGYGYGR	0.654781
Q62311	transcription initiation factor TFIID subunit 6 [Mus musculus]	Taf6	mmR488; mmR502	TTLTITQPRPTLTLSQAPQPGPR	0.655492
P97379	ras GTPase-activating protein-binding protein 2 isoform a [Mus musculus]	G3bp2	mmR438	GPGGPRGIVGGGMMR	0.65556
P24610	paired box protein Pax-7 [Mus musculus]	Pax3	mmR56	VNQLGGVFINGRPLPNHIR	0.655691
P29341	polyadenylate-binding protein 1 [Mus musculus]	Pabpc1	dmR481; mmR493	VMSTQRVANTSTQTMGPRPAAAAAAATPAVR	0.656608
O89086	putative RNA-binding protein 3 isoform 1 [Mus musculus]; putative RNA-binding protein 3 isoform 2 [Mus musculus]	Rbm3	mmR118	YDSRPGGYGYGYGR	0.658216
Q3TC46	protein PAT1 homolog 1 [Mus musculus]	Patl1	mmR276	AQLLGGAQLQPGR	0.660439
Q9WU42	nuclear receptor corepressor 2 [Mus musculus]	Ncor2	mmR1857	GVVTSVEPGTPTVLRWAR	0.660972
Q62431	AT-rich interactive domain-containing protein 3A [Mus musculus]	Arid3a	mmR13	LQAVMETLIQR	0.662327
Q08775	runt-related transcription factor 2 isoform type II [Mus musculus]	Runx2	dmR472	QFPSISSLTESRFSNPR	0.664133
Q8BZ32	putative Polycomb group protein ASXL2 [Mus musculus]	Asxl2	mmR560	QHQQPFQVSPQPFLNRGDR	0.665235
Q8VE18	protein SMG8 [Mus musculus]	Smg8	mmR898	ALNSDMPLYILSSSQGR	0.665913
Q6P7W2	SH3KBP1-binding protein 1 [Mus musculus]	Shkbp1	mmR642	TSLTSLHSASSNTSLYGPR	0.665962
Q9R0L7	A-kinase anchor protein 8-like [Mus musculus]	Akap8l	mmR172; mmR180	MRGGDTFGPRAQGWAR	0.666782
Q3TLH4	protein PRRC2C [Mus musculus]	Prrc2c	mmR243	LNGQQPALASQYR	0.669707
Q9CWN7	hypothetical protein LOC52846 [Mus musculus]	Cnot11	mmR39	SGPAGSSGGRGGAGGPGPGIGGPAGR	0.670018
Q80W00	serine/threonine-protein phosphatase 1 regulatory subunit 10 isoform 2 [Mus musculus]	Ppp1r10	mmR674	LLGPPPPSRGGDPFWDGPGDPMR	0.670229
P29341	polyadenylate-binding protein 1 [Mus musculus]	Pabpc1	mmR506	VANTSTQTMGPRPAAAAAAATPAVR	0.674535
Q8JZP9	GAS2-like protein 1 isoform beta [Mus musculus]	Gas2l1	dmR397; mmR406	RPTAPRSQSR	0.677051
O70305	ataxin-2 [Mus musculus]	Atxn2	mmR479	EVLSWGSGR	0.677655
Q8BP71	RNA binding protein fox-1 homolog 2 isoform 1 [Mus musculus]	Rbfox2	mmR21	MAEGGQAQQQPPQLGPGAAAR	0.681795
Q99LX5	multiple myeloma tumor-associated protein 2 homolog [Mus musculus]	Mmtag2	mmR10	GGVRGGQDQFNWEDVK	0.683208
Q9WUU8	TNFAIP3-interacting protein 1 isoform 1 [Mus musculus]	Tnip1	mmR584	DWSQIRYPPPPVPMEHPPPHPNSR	0.683546
Q8BX02	KN motif and ankyrin repeat domain-containing protein 2 [Mus musculus]	Kank2	mmR105	HSAYSYCGRGFYPQYGALETR	0.684623
Q9JLI8	squamous cell carcinoma antigen recognized by T-cells 3 [Mus musculus]	Sart3	mmR918	TQLSLLPR	0.684923
Q8C7E9	cleavage stimulation factor subunit 2 tau variant [Mus musculus]	Cstf2t	dmR322; mmR327	GQMQISDPRPPMPR	0.687455
Q03265	ATP synthase subunit alpha, mitochondrial precursor [Mus musculus]	Atp5a1	mmR204	AVDSLVPIGR; AVDSLVPIGRGQR	0.689871
Q9ERU9	E3 SUMO-protein ligase RanBP2 [Mus musculus]	Ranbp2	mmR1015	SNFVQPMQGEVIRPPLTTPAHTTQPTPFK	0.693142
D3YXK2	scaffold attachment factor B [Mus musculus]	Safb	mmR832	LSEGRGLPPPPR	0.693475
Q62167	ATP-dependent RNA helicase DDX3X [Mus musculus]	Ddx3x	mmR101	GRGDYDGIGGR	0.696426
Q04841	DNA-3-methyladenine glycosylase [Mus musculus]	Mpg	mmR161	IVETEAYLGPEDEAAHSRGGR	0.696493
Q9D6L8	peptidyl-prolyl cis-trans isomerase-like 3 isoform 1 [Mus musculus]	Ppil3	mmR61	GFMVQTGDPTGTGRGGSSIWAK	0.698841
Q8VBX6	multiple PDZ domain protein [Mus musculus]	Mpdz	mmR1158	SLGISIVGGR; SLGISIVGGRGMGSR	0.701004
Q8CH77	neuron navigator 1 [Mus musculus]	Nav1	mmR690	SSSMSVTGRGGPRPVSSSIDPSLLSTK	0.701056
P27661	histone H2A.x [Mus musculus]	H2afx	mmR21	SSRAGLQFPVGR	0.701076
Q8CGB6	tensin-like C1 domain-containing phosphatase [Mus musculus]	Tns2	mmR816	APHSCGSPSEGRGYPSPGAHSPR	0.702088
Q3UHH1	hypothetical protein LOC268721 [Mus musculus]	Zswim8	mmR1177	GGWAPTSWGR; GGWAPTSWGRGQDSDSISSSSSDSLGSSSSSGSR	0.704786
Q3U0V1	far upstream element-binding protein 2 [Mus musculus]	Khsrp	mmR217	GRGGPPGQFHDNANGGQNGTVQEIMIPAGK	0.70481
O70305	ataxin-2 [Mus musculus]	Atxn2	mmR216	KPGGGLLSSPGAAPASAAVTSASVVPAPAAPVASSSAAAGGGRPGLGRGR	0.706796
O70305	ataxin-2 [Mus musculus]	Atxn2	mmR209	KPGGGLLSSPGAAPASAAVTSASVVPAPAAPVASSSAAAGGGRPGLGRGR	0.706796
Q9CQ73	plakophilin-2 [Mus musculus]	Pkp2	mmR194	SEILGLRQAGTAR	0.708164
P29341	polyadenylate-binding protein 1 [Mus musculus]	Pabpc1	dmR432	AAYYPPSQIAQLRPSPR	0.709053
P29341	polyadenylate-binding protein 1 [Mus musculus]	Pabpc1	dmR436	AAYYPPSQIAQLRPSPR	0.709091
Q03265	ATP synthase subunit alpha, mitochondrial precursor [Mus musculus]	Atp5a1	mmR207	AVDSLVPIGRGQR	0.709249
P29341	polyadenylate-binding protein 1 [Mus musculus]	Pabpc1	mmR432; mmR436	AAYYPPSQIAQLRPSPR	0.709525
Q9Z1Y4	thyroid receptor-interacting protein 6 [Mus musculus]	Trip6	mmR209	RGASQASGPLPGPHFPLTGRGEVWGAGYR	0.710495
Q9WUK2	eukaryotic translation initiation factor 4H [Mus musculus]	Eif4h	dmR142	GMGGSRESR	0.712049
Q8K1N2	pleckstrin homology-like domain family B member 2 [Mus musculus]	Phldb2	mmR253	YSGSSLSNMGAYSR	0.712134
Q5I1X5	relA-associated inhibitor [Mus musculus]	Ppp1r13l	mmR160; mmR167	APSPRPGIGPVRQPGPSTPFDYLGR	0.713724
Q8BMS1	trifunctional enzyme subunit alpha, mitochondrial precursor [Mus musculus]	Hadha	mmR399	DTTVTGLGRGQQQVFK	0.713941
E9Q8I7	nuclear transcription factor, X-box binding-like 1 [Mus musculus]	Nfxl1	dmR18; mmR38	GRATAVPLSGNGVPFGGAGGGR	0.714582
E9Q414	apolipoprotein B precursor [Mus musculus]	Apob	mmR960	TEVIPPLVENR	0.714976
P29341	polyadenylate-binding protein 1 [Mus musculus]	Pabpc1	mmR436	AAYYPPSQIAQLRPSPR	0.715954
Q8CI61	BAG family molecular chaperone regulator 4 [Mus musculus]	Bag4	mmR54	GRGGAPAETTWPGEGAGGDGYYPSGGAWAEASR	0.717987
P47963	60S ribosomal protein L13 [Mus musculus]	Rpl13	mmR31	VDTWFNQPARK	0.720323
Q6NZJ6	eukaryotic translation initiation factor 4 gamma 1 isoform a [Mus musculus]	Eif4g1	mmR1094	ITKPGSIDSNNQLFAPGGR	0.72234
P29341	polyadenylate-binding protein 1 [Mus musculus]	Pabpc1	mmR432	AAYYPPSQIAQLRPSPR	0.722712
P29341	polyadenylate-binding protein 1 [Mus musculus]	Pabpc1	mmR419	AVPNPVINPYQPAPPSGYFMAAIPQTQNR	0.723656
Q8VBX6	multiple PDZ domain protein [Mus musculus]	Mpdz	mmR1163	SLGISIVGGRGMGSR	0.723938
Q3TLH4	protein PRRC2C [Mus musculus]	Prrc2c	dmR282	SLRGRGPPPSWASEPERPSILSASELK	0.728477
Q80XI3	eukaryotic translation initiation factor 4 gamma 3 [Mus musculus]	Eif4g3	mmR687	QTPGGRGVPLLNVGPR	0.730855
Q3TLH4	protein PRRC2C [Mus musculus]	Prrc2c	mmR280; dmR282	SLRGRGPPPSWASEPERPSILSASELK	0.731147
Q3TLH4	protein PRRC2C [Mus musculus]	Prrc2c	mmR280; mmR282	SLRGRGPPPSWASEPERPSILSASELK	0.734112
Q9DBR1	5'-3' exoribonuclease 2 [Mus musculus]	Xrn2	mmR880	GPPPLFQQHRFER	0.736163
Q3TLH4	protein PRRC2C [Mus musculus]	Prrc2c	dmR280	SLRGRGPPPSWASEPERPSILSASELK	0.737871
Q8R311	cutaneous T-cell lymphoma-associated antigen 5 homolog isoform 1 [Mus musculus]	Ctage5	mmR691	RGPSFPPPPPGSIYAAPR	0.737936
P29341	polyadenylate-binding protein 1 [Mus musculus]	Pabpc1	mmR493	VANTSTQTMGPRPAAAAAAATPAVR	0.738355
Q8R4U7	leucine zipper protein 1 [Mus musculus]	Luzp1	mmR369	ELGNGDIEGEDAFLLGRGR	0.739967
Q9R0L7	A-kinase anchor protein 8-like [Mus musculus]	Akap8l	mmR172; dmR180	MRGGDTFGPRAQGWAR	0.740007
Q8R311	cutaneous T-cell lymphoma-associated antigen 5 homolog isoform 1 [Mus musculus]	Ctage5	mmR714	DYFPPRDFPGPPLPPFPGR	0.740208
P29341	polyadenylate-binding protein 1 [Mus musculus]	Pabpc1	dmR432; mmR436	AAYYPPSQIAQLRPSPR	0.742232
Q61687	transcriptional regulator ATRX [Mus musculus]	Atrx	mmR2457	GMYQSVAGGMQPPPLQR	0.743127
P47963	60S ribosomal protein L13 [Mus musculus]	Rpl13	mmR74	AGRGFSLEELR	0.744945
P63254	cysteine-rich protein 1 [Mus musculus]	Crip1	mmR68	GFGRGGAESHTFK	0.745984
Q9WUK2	eukaryotic translation initiation factor 4H [Mus musculus]	Eif4h	mmR19	AYSSFGGGRGSR	0.74752
Q8VDM6	heterogeneous nuclear ribonucleoprotein U-like protein 1 isoform 1 [Mus musculus]	Hnrnpul1	mmR645; mmR659; mmR664	GGFQNRGGGGGSGGGGGNYRGGFNR	0.747572
P98203	armadillo repeat protein deleted in velo-cardio-facial syndrome homolog [Mus musculus]	Arvcf	mmR208	DIPSYGSLSR	0.749931
Q9Z1Y4	thyroid receptor-interacting protein 6 [Mus musculus]	Trip6	mmR242	SHREPGPGVPEGPSGVHIPAGGGRGGGHEPQGPLGQPPEEELER; EPGPGVPEGPSGVHIPAGGGRGGGHEPQGPLGQPPEEELER	0.750187
Q8BTI8	serine/arginine repetitive matrix protein 2 [Mus musculus]	Srrm2	mmR2115	TPMSVLQQTGGSMMDGPGPRIPDHPR	0.751618
Q9R0L7	A-kinase anchor protein 8-like [Mus musculus]	Akap8l	mmR172; mmR180; mmR186	MRGGDTFGPRAQGWAR	0.752001
Q8BX90	fibronectin type-III domain-containing protein 3A [Mus musculus]	Fndc3a	mmR113	VVVVPQSPEFHPGGHTVIHR	0.753157
Q8BG81	polymerase delta-interacting protein 3 [Mus musculus]	Poldip3	mmR31	LSVRPGIGGVR	0.753662
Q3UFK8	FERM domain-containing protein 8 [Mus musculus]	Frmd8	mmR217	GHGLFAAFRGR; GHGLFAAFR	0.753834
Q9CXK9	RNA-binding protein 33 [Mus musculus]	Rbm33	mmR520	DPFFLGVSGEPR	0.753872
Q689Z5	protein strawberry notch homolog 1 [Mus musculus]	Sbno1	mmR138	FIQTTANTRPSVSAPAVR	0.757275
Q8BIQ5	cleavage stimulation factor subunit 2 [Mus musculus]	Cstf2	dmR478	GMDTRGPVPGPRGPMPSGIQGPNPMNMGAVVPQGSR	0.758285
Q9D0W5	peptidyl-prolyl cis-trans isomerase-like 1 [Mus musculus]	Ppil1	mmR72	DFMIQGGDPTGTGRGGASIYGK	0.758646
Q8VIJ6	splicing factor, proline- and glutamine-rich [Mus musculus]	Sfpq	dmR673	FGQGGAGPVGGQGPRGMGPGTPAGYGR	0.758755
Q61033	lamina-associated polypeptide 2 isoform gamma [Mus musculus]; lamina-associated polypeptide 2 isoform alpha [Mus musculus]	Tmpo	mmR85; mmR87	EPTPVLGSGASVGRGR; GPPDFSSDEEREPTPVLGSGASVGRGR	0.758897
D3YXK2	scaffold attachment factor B [Mus musculus]	Safb	dmR890; mmR896; mmR906	SMSGHSGPGHMMNRGGMSGRGSFAPGGASR	0.75966
Q9D2D7	zinc finger protein 687 [Mus musculus]	Znf687	mmR1061; mmR1067	HGLPLGTQSSGRGGSLAR	0.760232
Q99MU3	double-stranded RNA-specific adenosine deaminase isoform 3 [Mus musculus]	Adar	mmR118	NQGFHIGPPLPPPHSR	0.760546
Q3TLH4	protein PRRC2C [Mus musculus]	Prrc2c	dmR280; mmR282	SLRGRGPPPSWASEPERPSILSASELK	0.761874
Q9WU56	tRNA pseudouridine synthase A, mitochondrial isoform 1 [Mus musculus]	Pus1	mmR50	GRGGWVWEETEHPAK	0.762125
Q91W92	cdc42 effector protein 1 [Mus musculus]	Cdc42ep1	mmR70	GGDVFGDTSFLSNHGGR	0.762945
Q8VIJ6	splicing factor, proline- and glutamine-rich [Mus musculus]	Sfpq	mmR687	GMGPGTPAGYGRGR	0.763152
Q8C9B9	death-inducer obliterator 1 isoform 3 [Mus musculus]	Dido1	mmR1787	TFGMSGHHGPSFPGPR	0.764195
Q6DFV3	rho GTPase-activating protein 21 isoform 1 [Mus musculus]	Arhgap21	mmR568	LVGRGVGPVSQFK	0.765466
Q60865	caprin-1 isoform a [Mus musculus]	Caprin1	mmR696	GGPPRPNRGMPQMNTQQVN	0.767838
Q8BKI2	trinucleotide repeat-containing gene 6B protein isoform 1 [Mus musculus]	Tnrc6b	mmR1597	NTTPLTRPPPGLTNPKPASPWSSTAPR	0.770517
P97855	ras GTPase-activating protein-binding protein 1 [Mus musculus]	G3bp1	mmR445; mmR458; mmR464	GPPRGGMVQKPGFGVGRGITTPR	0.772259
P59222	scavenger receptor class F member 2 precursor [Mus musculus]	Scarf2	mmR721	GRGLGLSEPTDAGGPPR	0.772761
Q3UJB0	splicing factor 3b, subunit 2 [Mus musculus]	Sf3b2	mmR205; mmR230	TPLGPRVAAPVGPVVPTPTVLPMGAPVPRPR	0.773228
Q9Z108	double-stranded RNA-binding protein Staufen homolog 1 isoform 3 [Mus musculus]	Stau1	mmR27	MQSTYSYGMRGGAYPPR	0.775692
O70305	ataxin-2 [Mus musculus]	Atxn2	mmR609; mmR634	VSAGRGSMSSGLEFVSHNPPSEAAAPPVAR	0.777061
G3X9Z4	pre-mRNA cleavage complex II protein Pcf11 [Mus musculus]	Pcf11	mmR864	FEGSTGGLRFEGPGGQPVGGLR	0.777296
Q67FY2	B-cell CLL/lymphoma 9-like protein [Mus musculus]	Bcl9l	mmR983	SPQVLSSSLGVR	0.778832
Q6P4S6	serine/threonine-protein kinase SIK3 [Mus musculus]	Sik3	mmR976	HSLTGHSDIRLPPAEFAQLIK	0.779731
P29341	polyadenylate-binding protein 1 [Mus musculus]	Pabpc1	mmR481; dmR493	VMSTQRVANTSTQTMGPRPAAAAAAATPAVR	0.781371
Q6J9G1	tyrosine-protein kinase STYK1 [Mus musculus]	Styk1	dmR77	GTASVPASRGR	0.781394
P97855	ras GTPase-activating protein-binding protein 1 [Mus musculus]	G3bp1	mmR445; dmR464	GPPRGGMVQKPGFGVGRGITTPR	0.782786
Q8C0D0	probable tRNA pseudouridine synthase 1 isoform 1 [Mus musculus]	Trub1	mmR122	VGHGGTLDSAAQGVLVVGIGRGTK	0.783001
Q5I1X5	relA-associated inhibitor [Mus musculus]	Ppp1r13l	mmR160; dmR167; mmR180	APSPRPGIGPVRQPGPSTPFDYLGR	0.783085
E9PYF4	LIM domain only 7 [Mus musculus]	Lmo7	mmR1023	ATFSSMSGLDSVSDSGEGRGSPLR	0.783418
Q99KW3	TRIO and F-actin-binding protein isoform 5 [Mus musculus]	Triobp	mmR1583	TGSEVIGRGGPR	0.784386
Q99KW3	TRIO and F-actin-binding protein isoform 1 [Mus musculus]; TRIO and F-actin-binding protein isoform 3 [Mus musculus]	Triobp	mmR1579	TGSEVIGRGGPR	0.78473
Q3TLH4	protein PRRC2C [Mus musculus]	Prrc2c	mmR256	AMMPPYMFQQYPR	0.785078
P30999	catenin delta-1 isoform 1 [Mus musculus]	Ctnnd1	mmR101	LNGPQDHNHLLYSTIPR	0.793706
Q8C9B9	death-inducer obliterator 1 isoform 3 [Mus musculus]	Dido1	mmR1754	EPQPRPGESTTSFPQPGQRGGGPQPQFPGQR	0.796783
Q8BKI2	trinucleotide repeat-containing gene 6B protein isoform 1 [Mus musculus]	Tnrc6b	mmR1406	TRGGSPYNQFDIIPGDTLGGHTGPAGDSWLPAK	0.79687
Q3U5F4	yrdC domain-containing protein, mitochondrial precursor [Mus musculus]	Yrdc	dmR29; mmR32	AAVAAGMGLSDGPASSGRGCR	0.797442
A2AKB9	DDB1- and CUL4-associated factor 10 [Mus musculus]	Dcaf10	mmR141	SLGRGLFVDPAR	0.797701
Q8BIQ5	cleavage stimulation factor subunit 2 [Mus musculus]	Cstf2	mmR471; mmR478	GMDTRGPVPGPRGPMPSGIQGPNPMNMGAVVPQGSR	0.798728
Q5I1X5	relA-associated inhibitor [Mus musculus]	Ppp1r13l	dmR167	APSPRPGIGPVRQPGPSTPFDYLGR	0.79923
Q8CI61	BAG family molecular chaperone regulator 4 [Mus musculus]	Bag4	mmR108; mmR110	AGGGHQEQPPYPGYNSNYWNSVRPR	0.800478
Q8R311	cutaneous T-cell lymphoma-associated antigen 5 homolog isoform 1 [Mus musculus]	Ctage5	mmR727	DFPGPPLPPFPGR	0.802866
Q61033	lamina-associated polypeptide 2 isoform gamma [Mus musculus]	Tmpo	dmR85	GPPDFSSDEEREPTPVLGSGASVGRGR	0.803841
Q5I1X5	relA-associated inhibitor [Mus musculus]	Ppp1r13l	dmR160; mmR167; mmR180	APSPRPGIGPVRQPGPSTPFDYLGR	0.803957
O08583	THO complex subunit 4 [Mus musculus]	Alyref	mmR50	VNRGGGPMR	0.804435
Q61033	lamina-associated polypeptide 2 isoform beta [Mus musculus]; lamina-associated polypeptide 2 isoform gamma [Mus musculus]; lamina-associated polypeptide 2 isoform alpha [Mus musculus]	Tmpo	dmR87	EPTPVLGSGASVGRGR; GPPDFSSDEEREPTPVLGSGASVGRGR	0.805358
Q8VHR5	transcriptional repressor p66-beta [Mus musculus]	Gatad2b	mmR332	TTSSAIYMNLASHIQPGTVNR	0.805919
Q61598	rab GDP dissociation inhibitor beta [Mus musculus]	Gdi2	mmR68	FKLPGQPPASMGRGR; FKLPGQPPASMGR	0.811661
Q3UJB0	splicing factor 3b, subunit 2 [Mus musculus]	Sf3b2	mmR205; mmR228	TPLGPRVAAPVGPVVPTPTVLPMGAPVPRPR	0.812122
Q91W92	cdc42 effector protein 1 [Mus musculus]	Cdc42ep1	mmR53	HTMHVGRGGDVFGDTSFLSNHGGR	0.814133
Q8VIJ6	splicing factor, proline- and glutamine-rich [Mus musculus]	Sfpq	dmR685	FGQGGAGPVGGQGPRGMGPGTPAGYGR	0.816118
Q8VDM6	heterogeneous nuclear ribonucleoprotein U-like protein 1 isoform 1 [Mus musculus]	Hnrnpul1	mmR645; mmR659	GGFQNRGGGGGSGGGGGNYRGGFNR	0.816761
Q8QZY9	splicing factor 3B subunit 4 [Mus musculus]	Sf3b4	mmR419	GPLRGPLPQ	0.816886
Q8VIJ6	splicing factor, proline- and glutamine-rich [Mus musculus]	Sfpq	mmR673; mmR685	FGQGGAGPVGGQGPRGMGPGTPAGYGRGR; FGQGGAGPVGGQGPRGMGPGTPAGYGR	0.817199
Q6PEV3	WAS/WASL-interacting protein family member 2 [Mus musculus]	Wipf2	mmR292; mmR310	TPGPVRGLAPPPPTSATPSLLSNRPPPPAR	0.81832
Q3U7U3	F-box only protein 7 [Mus musculus]	Fbxo7	mmR499	FDPVDPLPGPHSLLPGR	0.819155
Q8BIQ5	cleavage stimulation factor subunit 2 [Mus musculus]	Cstf2	dmR471	GMDTRGPVPGPRGPMPSGIQGPNPMNMGAVVPQGSR	0.819828
Q9JL19	nuclear receptor coactivator 6 isoform 1 [Mus musculus]	Ncoa6	mmR1050	SIRLPVSQNVHPPR	0.819912
Q3U7U3	F-box only protein 7 [Mus musculus]	Fbxo7	mmR514; mmR519	GRSADSRLPFL	0.822209
O35071	kinesin-like protein KIF1C [Mus musculus]	Kif1c	mmR947; dmR957	QEQLRLQGLQGAGGRGGGLR	0.825724
Q9DBR1	5'-3' exoribonuclease 2 [Mus musculus]	Xrn2	mmR864	LMSNMRPQDSWRGPPPLFQQHR	0.82771
Q91YD9	neural Wiskott-Aldrich syndrome protein isoform 1 [Mus musculus]	Wasl	mmR281	QAPPPPPPSRGGPPPPPPPPHSSGPPPPPAR	0.828604
Q14AX6	cyclin-dependent kinase 12 isoform 1 [Mus musculus]	Cdk12	mmR1471	LQNYGELGPGTTGANSSGTTLQWGGPAQSYGKPYRGAAR	0.8307
Q14AX6	cyclin-dependent kinase 12 isoform 1 [Mus musculus]	Cdk12	mmR1467	LQNYGELGPGTTGANSSGTTLQWGGPAQSYGKPYRGAAR	0.8307
Q8C9B9	death-inducer obliterator 1 isoform 3 [Mus musculus]	Dido1	dmR1960; mmR1971	GTHPGQFEGARGQAPGFMPGPRGIQPQQFEEQR	0.833427
Q8C9B9	death-inducer obliterator 1 isoform 3 [Mus musculus]	Dido1	mmR1960; dmR1971	GTHPGQFEGARGQAPGFMPGPRGIQPQQFEEQR	0.833427
E9Q8I7	nuclear transcription factor, X-box binding-like 1 [Mus musculus]	Nfxl1	mmR38	ATAVPLSGNGVPFGGAGGGRAK; ATAVPLSGNGVPFGGAGGGR	0.833688
P29341	polyadenylate-binding protein 1 [Mus musculus]	Pabpc1	mmR518	YAAGVRNPQQHLNAQPQVTMQQPAVHVQGQEPLTASMLASAPPQEQK	0.834385
P45481	CREB-binding protein [Mus musculus]	Crebbp	mmR2365	SPAPVQSPRPQSQPPHSSPSPR	0.834574
Q60865	caprin-1 isoform a [Mus musculus]	Caprin1	mmR638	GPANGFRGGYDGYRPSFSNTPNSGYSQSQFTAPR; GGYDGYRPSFSNTPNSGYSQSQFTAPR	0.835414
Q8BT14	CCR4-NOT transcription complex subunit 4 isoform 2 [Mus musculus]	Cnot4	mmR497	AVYNSFGFPGQAAR	0.837366
Q61545	RNA-binding protein EWS [Mus musculus]	Ewsr1	mmR580; mmR588	GGLMDRGGPGGMFR	0.839935
A2ABV5	mediator of RNA polymerase II transcription subunit 14 isoform b [Mus musculus]	Med14	mmR1128	AGNWPGSPQVSGPSPATRLPGMSPANPSLHSPVPDVSHSPR	0.842184
Q8BYR2	serine/threonine-protein kinase LATS1 [Mus musculus]	Lats1	mmR259	GQTPPPRGTTPPPPSWEPSSQTK	0.842515
O70546	lysine-specific demethylase 6A [Mus musculus]	Kdm6a	dmR519; mmR549	QTGVAQVRPTGILNGPTVDSSLPTNSVSGQQPQLPLTR	0.845295
Q8BI84	melanoma inhibitory activity protein 3 precursor [Mus musculus]	Mia3	dmR1865; mmR1873	EFLPGHTPFRPPGSLGPR	0.846395
Q9JK92	heat shock protein beta-8 [Mus musculus]	Hspb8	mmR65	LSSAWPGTLR	0.846762
O70546	lysine-specific demethylase 6A [Mus musculus]	Kdm6a	mmR519; mmR549	QTGVAQVRPTGILNGPTVDSSLPTNSVSGQQPQLPLTR	0.847115
O88569	heterogeneous nuclear ribonucleoproteins A2/B1 isoform 2 [Mus musculus]	Hnrnpa2b1	mmR352	NMGGPYGGGNYGPGGSGGSGGYGGRSR	0.847462
Q3TLH4	protein PRRC2C [Mus musculus]	Prrc2c	mmR2775	AEVLQSTQRFFSEQQQNK	0.847717
P29341	polyadenylate-binding protein 1 [Mus musculus]	Pabpc1	mmR493; mmR506	VANTSTQTMGPRPAAAAAAATPAVR	0.848844
Q8R311	cutaneous T-cell lymphoma-associated antigen 5 homolog isoform 1 [Mus musculus]	Ctage5	mmR685	DPLFPVDPR	0.849762
P29341	polyadenylate-binding protein 1 [Mus musculus]	Pabpc1	dmR493	VMSTQRVANTSTQTMGPRPAAAAAAATPAVR; VANTSTQTMGPRPAAAAAAATPAVR	0.851479
Q8BIQ5	cleavage stimulation factor subunit 2 [Mus musculus]	Cstf2	mmR478	GPVPGPRGPMPSGIQGPNPMNMGAVVPQGSR	0.854116
O89086	putative RNA-binding protein 3 isoform 2 [Mus musculus]	Rbm3	mmR148	DYSGSQGGYDRYSGGNYR	0.854482
A2AIV2	protein virilizer homolog [Mus musculus]	Kiaa1429	mmR1774; dmR1792	GRGGLGPSWASTNSGSGGSRGK	0.858217
Q9Z138	tyrosine-protein kinase transmembrane receptor ROR2 precursor [Mus musculus]	Ror2	mmR785	SWGNLSNYNSSAQTSGASNTTQTSSLSTSPVSNVSNAR	0.859065
Q8K4P0	WD repeat domain 33 isoform 1 [Mus musculus]	Wdr33	mmR1023	LREFEGRGGPLPQEEK	0.859342
P62996	transformer-2 protein homolog beta [Mus musculus]	Tra2b	mmR241	SYRGGGGGGGGWR	0.860198
Q8BKI2	trinucleotide repeat-containing gene 6B protein isoform 1 [Mus musculus]	Tnrc6b	mmR1198	GLHTPVQPLSSSPGLR	0.861856
Q6PAL7	AT-hook DNA-binding motif-containing protein 1 [Mus musculus]	Ahdc1	mmR150	LSQDLQHSGVHLDCGGLR	0.862696
Q03347	runt-related transcription factor 1 isoform 4 [Mus musculus]	Runx1	mmR319	QFPTLPSISDPR	0.863861
Q61191	host cell factor 1 [Mus musculus]	Hcfc1	mmR524	APVTVTSLPASVR	0.866785
Q6Y7W8	PERQ amino acid-rich with GYF domain-containing protein 2 isoform a [Mus musculus]	Gigyf2	dmR154	SFDEVEGVFGRGGGR	0.866797
Q32P12	hypothetical protein LOC217216 [Mus musculus]	No match	mmR255	GSPAPAPQYLPVAGR	0.867071
Q8C9B9	death-inducer obliterator 1 isoform 3 [Mus musculus]	Dido1	mmR1858	GLSPSYLGGPRGGAPAQFEDR	0.867194
P46062	signal-induced proliferation-associated protein 1 [Mus musculus]	Sipa1	mmR59; mmR67	SGSDAGEVRPPTPASPR	0.867453
A2AGH6	mediator of RNA polymerase II transcription subunit 12 [Mus musculus]	Med12	mmR1856	QSSMGLYTQNQPLPAGGPR	0.868272
Q8BIH0	histone deacetylase complex subunit SAP130 [Mus musculus]	Sap130	mmR206	SNAPGPPLHIGASHLPR	0.868395
Q6P4S6	serine/threonine-protein kinase SIK3 [Mus musculus]	Sik3	mmR837	SIPISPSASQIQIQHR	0.869106
Q61191	host cell factor 1 [Mus musculus]	Hcfc1	mmR847; mmR855	GAPGQPGTILRTVPMGGVR	0.8696
Q9JK92	heat shock protein beta-8 [Mus musculus]	Hspb8	mmR86	FGVPAEGRSPPPFPGEPWK	0.870841
G3X9Z4	pre-mRNA cleavage complex II protein Pcf11 [Mus musculus]	Pcf11	dmR1062; mmR1065	FDGLHGQPGPRFER	0.871325
Q8VHR5	transcriptional repressor p66-beta [Mus musculus]	Gatad2b	mmR278; mmR287	VIAPNPAQLQGQRGPPKPGIVR	0.871682
Q3U0V1	far upstream element-binding protein 2 [Mus musculus]	Khsrp	dmR412; dmR414; mmR416	SGPPGPPGAPGMPPGGRGRGR	0.873003
O70492	sorting nexin-3 [Mus musculus]	Snx3	mmR43	LITKPQNLNDAYGPPSNFLEIDVSNPQTVGVGRGR; LITKPQNLNDAYGPPSNFLEIDVSNPQTVGVGR	0.87365
P61406	telomerase-binding protein EST1A [Mus musculus]	Smg6	mmR511	FQNSDNPYYYPR	0.87432
Q7TSC1	protein PRRC2A isoform 1 [Mus musculus]	Prrc2a	mmR2082; mmR2090	TPPSGRPFSGLNSRLK; TPPSGRPFSGLNSR	0.87646
P70255	nuclear factor 1 C-type isoform a [Mus musculus]	Nfic	mmR365	LSSFTQHHRPVIAVHSGIAR	0.876843
Q3TLH4	protein PRRC2C [Mus musculus]	Prrc2c	mmR282	GRGPPPSWASEPERPSILSASELK	0.87924
Q9DBR1	5'-3' exoribonuclease 2 [Mus musculus]	Xrn2	mmR947	KYPLPPPSGRYSWN; YPLPPPSGRYSWN	0.880481
P97855	ras GTPase-activating protein-binding protein 1 [Mus musculus]	G3bp1	dmR445; dmR458	GPPRGGMVQKPGFGVGRGITTPR	0.881589
Q9Z108	double-stranded RNA-binding protein Staufen homolog 1 isoform 3 [Mus musculus]	Stau1	mmR20	MQSTYSYGMRGGAYPPR	0.882926
P80313	T-complex protein 1 subunit eta [Mus musculus]	Cct7	dmR538	STVDPPAPSAGRGR	0.88462
P80313	T-complex protein 1 subunit eta [Mus musculus]	Cct7	dmR536	STVDPPAPSAGRGR	0.88462
Q8K4P0	WD repeat domain 33 isoform 1 [Mus musculus]	Wdr33	mmR909	APLLGDGPRAPFNQEGQSTGPPPLIPGLGQQGAQGR	0.885481
Q08775	runt-related transcription factor 2 isoform type II [Mus musculus]	Runx2	mmR423	GTGLPAITDVPRR	0.885652
Q7TSC1	protein PRRC2A isoform 1 [Mus musculus]	Prrc2a	dmR2040; mmR2048	VLPSPARPFAPSLGR	0.886111
Q8K4P0	WD repeat domain 33 isoform 1 [Mus musculus]	Wdr33	mmR1028	EFEGRGGPLPQEEK; LREFEGRGGPLPQEEK	0.886122
Q5SFM8	RNA-binding protein 27 [Mus musculus]	Rbm27	mmR411	DQPGTSAVPNLAPVGAR	0.886471
Q8C9B9	death-inducer obliterator 1 isoform 3 [Mus musculus]	Dido1	mmR1848	GLSPSYLGGPR; GLSPSYLGGPRGGAPAQFEDR	0.886958
Q61194	phosphatidylinositol-4-phosphate 3-kinase C2 domain-containing subunit alpha [Mus musculus]	Pik3c2a	mmR175	QATFQNGFSPR	0.888183
Q6PHQ9	polyadenylate-binding protein 4 isoform 1 [Mus musculus]	Pabpc4	mmR475	HLAPTGNAPASRGLPTTAQR	0.88855
Q80UJ7	rab3 GTPase-activating protein catalytic subunit [Mus musculus]	Rab3gap1	mmR887	FVSCLLEQPEVSVTGAGRGHAGR	0.890545
Q80UJ7	rab3 GTPase-activating protein catalytic subunit [Mus musculus]	Rab3gap1	mmR892	FVSCLLEQPEVSVTGAGRGHAGR	0.890545
O70492	sorting nexin-3 [Mus musculus]	Snx3	mmR45	LITKPQNLNDAYGPPSNFLEIDVSNPQTVGVGRGR	0.89095
Q9CY73	39S ribosomal protein L44, mitochondrial precursor [Mus musculus]	Mrpl44	mmR52	LLRCPPPPVR	0.89172
Q9Z1Y4	thyroid receptor-interacting protein 6 [Mus musculus]	Trip6	mmR25	SLPRGALGPPTAHGATLQPHPR	0.891743
Q14AX6	cyclin-dependent kinase 12 isoform 1 [Mus musculus]	Cdk12	mmR1400	TFSGSVSHLGESNSYQGTGSVQFPGDQDLRFTR	0.892416
O08550	histone-lysine N-methyltransferase MLL4 [Mus musculus]	Kmt2b	mmR2088	GQGTPPSGPGVGRGGVLGAAGDR	0.893749
E9PWH2	caspase recruitment domain family, member 6 [Mus musculus]	Card6	mmR778	YLQPWRFYSR	0.89383
Q9DBR1	5'-3' exoribonuclease 2 [Mus musculus]	Xrn2	mmR883; mmR895	FERSVGAEPLLPWNR	0.894478
Q8R326	paraspeckle component 1 [Mus musculus]	Pspc1	mmR507	TGSETPQAPMSGVGPVSGGPGGFGR; TGSETPQAPMSGVGPVSGGPGGFGRGSQGGNFEGPNKR; TGSETPQAPMSGVGPVSGGPGGFGRGSQGGNFEGPNK	0.895091
Q7TPM1	protein PRRC2B isoform 1 [Mus musculus]	Prrc2b	mmR1426	YGSGQQPLILPQSIQLPPGQSLSVGAPRR	0.895319
Q3UJB0	splicing factor 3b, subunit 2 [Mus musculus]	Sf3b2	mmR228; mmR230	VAAPVGPVVPTPTVLPMGAPVPRPR	0.896602
F6ZDS4	nuclear pore complex-associated protein Tpr [Mus musculus]	Tpr	mmR2174	RQSVGRGLQLTPGIGGMQQHFFDDEDR	0.897406
Q7TPM1	protein PRRC2B isoform 1 [Mus musculus]	Prrc2b	mmR1427	YGSGQQPLILPQSIQLPPGQSLSVGAPRR	0.898451
P61406	telomerase-binding protein EST1A [Mus musculus]	Smg6	mmR405	GRGILILPAHTALSVSSSGSPESTPLGPR	0.89938
E9PZM7	splicing factor, arginine/serine-rich 2, interacting protein [Mus musculus]	Scaf11	mmR1168	SGWTSASSWAVRK; SGWTSASSWAVR	0.899851
Q9D011	TTD non-photosensitive 1 protein homolog [Mus musculus]	Mplkip	dmR76; mmR91	HGGNFSGARFGSPSPGGYPGSYSR	0.899991
Q7TSC1	protein PRRC2A isoform 1 [Mus musculus]	Prrc2a	mmR2063	AELHPVELKPFQDYRK	0.901032
F6ZDS4	nuclear pore complex-associated protein Tpr [Mus musculus]	Tpr	mmR2179	QSVGRGLQLTPGIGGMQQHFFDDEDR; RQSVGRGLQLTPGIGGMQQHFFDDEDR; QSVGRGLQLTPGIGGMQQHFFDDEDRTVPSTPTLVVPHR	0.90151
Q9JLQ2	ARF GTPase-activating protein GIT2 isoform 1 [Mus musculus]	Git2	mmR499	LQPFPTHIGR	0.903691
Q9QYS9	protein quaking isoform 3 [Mus musculus]	Qki	mmR256	TPTPAGPTIMPLIR	0.904589
Q9QYS9	protein quaking isoform 3 [Mus musculus]	Qki	mmR242	IITGPAPVLPPAALRTPTPAGPTIMPLIR; IITGPAPVLPPAALR	0.907114
Q9R0L7	A-kinase anchor protein 8-like [Mus musculus]	Akap8l	mmR172; dmR186	MRGGDTFGPRAQGWAR	0.908652
E9QAM5	PPAR gamma-DNA-binding domain interacting protein1 [Mus musculus]	Helz2	mmR2381	LVSELRWPIPGPR	0.909211
Q61033	lamina-associated polypeptide 2 isoform alpha [Mus musculus]; lamina-associated polypeptide 2 isoform beta [Mus musculus]; lamina-associated polypeptide 2 isoform gamma [Mus musculus]; lamina-associated polypeptide 2 isoform epsilon [Mus musculus]	Tmpo	mmR85	GPPDFSSDEEREPTPVLGSGASVGR; GPPDFSSDEEREPTPVLGSGASVGRGR; EPTPVLGSGASVGR	0.909937
Q8CHY6	transcriptional repressor p66 alpha isoform a [Mus musculus]; transcriptional repressor p66 alpha isoform b [Mus musculus]	Gatad2a	mmR268	QHSSTGPPPLLLAPR	0.910093
Q32P12	hypothetical protein LOC217216 [Mus musculus]	No match	mmR258; mmR274	TIRSSPQNYGPGQPLQSPR	0.910474
Q3U5F4	yrdC domain-containing protein, mitochondrial precursor [Mus musculus]	Yrdc	mmR29	AAVAAGMGLSDGPASSGRGCR; AAVAAGMGLSDGPASSGR	0.910583
Q8VEK3	heterogeneous nuclear ribonucleoprotein U [Mus musculus]	Hnrnpu	dmR709; mmR715; mmR730	RGNMPQRGGGGGSGGIGYPYPR	0.912769
Q6A0A9	constitutive coactivator of PPAR-gamma-like protein 1 [Mus musculus]	FAM120A	mmR882; dmR884	HFGPVPPSQGRGRGFAGVCGFGGHYGETVATGPYR	0.915539
Q62376	U1 small nuclear ribonucleoprotein 70 kDa [Mus musculus]	Snrnp70	mmR403	DEARGGGGSGQDNGLEGLGSDGR	0.916363
Q6PHQ9	polyadenylate-binding protein 4 isoform 1 [Mus musculus]	Pabpc4	mmR525	LAMDFGGAGAAQQGLTDSCQSGGVPTAVPNLAPR	0.917059
Q7TSC1	protein PRRC2A isoform 1 [Mus musculus]	Prrc2a	mmR2090	TPPSGRPFSGLNSRLK; TPPSGRPFSGLNSR	0.918194
Q5I1X5	relA-associated inhibitor [Mus musculus]	Ppp1r13l	mmR82	YSTSPVPEHFGSRGSPQK; YSTSPVPEHFGSR	0.919277
Q99KY4	cyclin-G-associated kinase [Mus musculus]	Gak	mmR1145	ASEQLRSHFSVIGAR	0.920686
Q9JHC9	ETS-related transcription factor Elf-2 [Mus musculus]	Elf2	mmR496	SNLTGSGSINIVGTPLAVR	0.921025
Q3U5F4	yrdC domain-containing protein, mitochondrial precursor [Mus musculus]	Yrdc	mmR32	AAVAAGMGLSDGPASSGRGCR	0.921284
Q8R0G9	nuclear pore complex protein Nup133 [Mus musculus]	Nup133	mmR17	RGPLVGIGPTSTPR	0.923315
Q7TPM1	protein PRRC2B isoform 1 [Mus musculus]	Prrc2b	mmR313	LEPRVPFR	0.924068
Q6PHQ9	polyadenylate-binding protein 4 isoform 1 [Mus musculus]	Pabpc4	dmR459; dmR463; mmR475	QSGPRPALRHLAPTGNAPASR	0.924085
P53995	anaphase-promoting complex subunit 1 [Mus musculus]	Anapc1	mmR352	SPSISNMAALSR	0.924114
Q62311	transcription initiation factor TFIID subunit 6 [Mus musculus]	Taf6	mmR524	VPGSIALPVQTLVSAR	0.92475
E9Q4N7	AT rich interactive domain 1B (Swi1 like) [Mus musculus]	Arid1b	mmR464	SHPAMSPGTPGPTMGR	0.924805
Q61033	lamina-associated polypeptide 2 isoform gamma [Mus musculus]	Tmpo	dmR71; mmR85	GPPDFSSDEEREPTPVLGSGASVGR	0.926044
Q3V3R1	monofunctional C1-tetrahydrofolate synthase, mitochondrial precursor [Mus musculus]	Mthfd1l	mmR851	EAANKRSR	0.927425
Q91YD9	neural Wiskott-Aldrich syndrome protein isoform 1 [Mus musculus]	Wasl	mmR304	GRGAPPPPPSR	0.93085
A2A654	bromodomain PHD finger transcription factor [Mus musculus]	Bptf	mmR2156	VLGIIPSTTGPSQQTFTSFQPR	0.931277
Q9R0I7	YLP motif-containing protein 1 [Mus musculus]	Ylpm1	mmR706; mmR709	GSFLEGPRGPR	0.931798
O70133	ATP-dependent RNA helicase A [Mus musculus]	Dhx9	dmR1361; mmR1372	RGYGGGYFGQGRGGGGGGGY	0.932519
Q8BH74	nuclear pore complex protein Nup107 [Mus musculus]	Nup107	mmR60; mmR69	TPSSFRQPFVTPSSR	0.932814
Q61033	lamina-associated polypeptide 2 isoform alpha [Mus musculus]	Tmpo	mmR71	GPPDFSSDEEREPTPVLGSGASVGRGR	0.932969
Q8BT14	CCR4-NOT transcription complex subunit 4 isoform 2 [Mus musculus]; CCR4-NOT transcription complex subunit 4 isoform 4 [Mus musculus]	Cnot4	mmR505	YPWMAFPR	0.93384
Q3TLH4	protein PRRC2C [Mus musculus]	Prrc2c	mmR2631; mmR2641	AFGSGIDIKPGTPPIGGRSTTPTSSPFR	0.934117
Q9JL61	regulatory factor X, 5 [Mus musculus]	Rfx5	mmR335	LPVLLPR	0.93609
Q9JHC9	ETS-related transcription factor Elf-2 [Mus musculus]	Elf2	mmR511	ALTPVSIAHGTPVMR	0.937189
Q3TEI4	hypothetical protein LOC74211 [Mus musculus]	No match	mmR318	GAAYQAGGLGSPYLR	0.937265
Q8K1I7	WAS/WASL-interacting protein family member 1 [Mus musculus]	Wipf1	mmR126; mmR135	DNDSGGSRPPILPPGGR	0.938003
P63325	40S ribosomal protein S10 [Mus musculus]	Rps10	mmR153	AEAGAGSATEFQFR; KAEAGAGSATEFQFR	0.938585
Q8K2F8	protein LSM14 homolog A [Mus musculus]	Lsm14a	mmR268	QVVPGVPSAPR	0.940099
Q9CXK9	RNA-binding protein 33 [Mus musculus]	Rbm33	mmR359	EHRPALLPTQPSVVAHSPR	0.940413
Q8R311	cutaneous T-cell lymphoma-associated antigen 5 homolog isoform 1 [Mus musculus]	Ctage5	mmR538	LSPLLPGGGGRGSR	0.941747
Q8CI08	SLAIN motif-containing protein 2 isoform a [Mus musculus]	Slain2	dmR538; mmR551	SGLPRPSAPSAGGIPVPR	0.943842
B1AVB3	sex comb on midleg-like protein 2 [Mus musculus]	Scml2	mmR333	GRGFTQPLEDEARPGR	0.943938
Q8BH74	nuclear pore complex protein Nup107 [Mus musculus]	Nup107	mmR73	SLLRHPDISYILGTEGR	0.94472
Q9CQB2	hypothetical protein LOC68241 [Mus musculus]	Fam195a	dmR35; mmR65	CRQPVPPTALPAHLQPSAQTQGPWPLASSGPR	0.945183
O35691	pinin [Mus musculus]	Pnn	mmR54	LLALSGPGGGRGR; LLALSGPGGGR	0.949976
Q9D011	TTD non-photosensitive 1 protein homolog [Mus musculus]	Mplkip	mmR116	SPAGSQHQFGYSPGQQQTYPQGSPR	0.950213
Q9Z1Y4	thyroid receptor-interacting protein 6 [Mus musculus]	Trip6	dmR25; mmR43	SLPRGALGPPTAHGATLQPHPR	0.95094
P46062	signal-induced proliferation-associated protein 1 [Mus musculus]	Sipa1	mmR50; mmR59	GPLLRSGSDAGEVRPPTPASPR	0.951872
P27048	small nuclear ribonucleoprotein-associated protein B [Mus musculus]	Snrpb	mmR108; dmR112; mmR132	VPLAGAAGGPGIGRAAGRGIPAGVPMPQAPAGLAGPVR	0.953864
P97863	nuclear factor 1 B-type isoform 1 [Mus musculus]; nuclear factor 1 B-type isoform 3 [Mus musculus]	Nfib	mmR335	KPEKPLFSSTSPQDSSPR	0.953974
Q8CGF7	transcription elongation regulator 1 [Mus musculus]	Tcerg1	mmR20; dmR28	FNPGELRMAQQQALR	0.954995
Q6PEV3	WAS/WASL-interacting protein family member 2 [Mus musculus]	Wipf2	mmR37	NRGALLQDICK	0.956457
Q9CY57	Friend of PRMT1 protein [Mus musculus]	Chtop	mmR111	GLPIIQR	0.956875
Q9DBR0	A-kinase anchor protein 8 [Mus musculus]	Akap8	mmR232	SDPFMPPSASEPLSTTWNELNYMGGR	0.957757
Q8BL06	inactive ubiquitin carboxyl-terminal hydrolase 54 [Mus musculus]	Usp54	mmR1531	STWNSGPVLGSR	0.958141
Q64152	transcription factor BTF3 isoform 1 [Mus musculus]	Btf3	mmR19	ARGGWPGAEATPSLPLGGSR	0.961322
Q67FY2	B-cell CLL/lymphoma 9-like protein [Mus musculus]	Bcl9l	dmR983; mmR991	SPQVLSSSLGVRSPTGSPSRLK	0.961431
E9QAP7	transcription initiation factor TFIID subunit 4 [Mus musculus]	Taf4	mmR94	AAAAGALGNHVVSGSPAGAAGAGPAASAEGAPAAAPEPPPAGR	0.961492
Q9WU42	nuclear receptor corepressor 2 [Mus musculus]	Ncor2	mmR1624	GIPLEAAAAAYYLPR	0.963184
Q9DBR0	A-kinase anchor protein 8 [Mus musculus]	Akap8	mmR276	GLGGPSTSRPPPSLFSQSMAPDYSMMGMQGVGGFGGTMPYGCGR	0.963359
Q8BZ32	putative Polycomb group protein ASXL2 [Mus musculus]	Asxl2	mmR563	QHQQPFQVSPQPFLNRGDR	0.964684
Q67FY2	B-cell CLL/lymphoma 9-like protein [Mus musculus]	Bcl9l	dmR991	SPQVLSSSLGVRSPTGSPSRLK	0.964911
O70305	ataxin-2 [Mus musculus]	Atxn2	mmR609	VSAGRGSMSSGLEFVSHNPPSEAAAPPVAR	0.965451
D3Z3N4	heterogeneous nuclear ribonucleoprotein H3 [Mus musculus]	Hnrnph3	mmR174	DGRGMGGHGYGGAGDASSGFHGGHFVHMR	0.966943
Q9WU42	nuclear receptor corepressor 2 [Mus musculus]	Ncor2	mmR1854; mmR1857	GVVTSVEPGTPTVLRWAR	0.967146
Q8K1I7	WAS/WASL-interacting protein family member 1 [Mus musculus]	Wipf1	dmR212; mmR219	GSPAGLGAPRPPFPGNR	0.967265
Q8BWW4	la-related protein 4 isoform 2 [Mus musculus]	Larp4	mmR440	EAPILQMEQNGDFGRGR	0.969767
Q8CI61	BAG family molecular chaperone regulator 4 [Mus musculus]	Bag4	mmR253	AVPQSGGTGRPQDDAWASSAYGMGAR	0.970979
Q8BWW4	la-related protein 4 isoform 2 [Mus musculus]; la-related protein 4 isoform 1 [Mus musculus]	Larp4	mmR438	EAPILQMEQNGDFGR; EAPILQMEQNGDFGRGR	0.971412
O54967	activated CDC42 kinase 1 isoform 1 [Mus musculus]	Tnk2	mmR854	YATPQVIQAPGPR	0.971666
Q8CAF4	NHS-like protein 1 isoform 1 [Mus musculus]	Nhsl1	mmR1487	SLSFSGPRYSR	0.973594
G3X9Z4	pre-mRNA cleavage complex II protein Pcf11 [Mus musculus]	Pcf11	mmR1051	FDGQPGQPSLLPR	0.974038
O54967	activated CDC42 kinase 1 isoform 1 [Mus musculus]	Tnk2	mmR880	VSSTHYYLLPERPPYLER	0.97435
Q60865	caprin-1 isoform a [Mus musculus]	Caprin1	dmR631; dmR638	GPANGFRGGYDGYRPSFSNTPNSGYSQSQFTAPR	0.975438
Q9QYS9	protein quaking isoform 3 [Mus musculus]	Qki	mmR227	SPALAFSLAATAQAAPR	0.975539
Q9WU42	nuclear receptor corepressor 2 [Mus musculus]	Ncor2	mmR1682	ADMLRGLSPR	0.975729
Q3UJB0	splicing factor 3b, subunit 2 [Mus musculus]	Sf3b2	mmR199	MGTAVPRPPQDMGQLGVR	0.975883
A2BH40	AT-rich interactive domain-containing protein 1A [Mus musculus]	Arid1a	mmR236	SAYPPPPQAYALSSPR	0.976667
Q8BH74	nuclear pore complex protein Nup107 [Mus musculus]	Nup107	mmR48	VLIQANQEDNFGTATPR	0.977083
P42128	forkhead box protein K1 [Mus musculus]	Foxk1	mmR147	HLQLSFQEPHFYLR	0.977604
Q9WU42	nuclear receptor corepressor 2 [Mus musculus]	Ncor2	mmR1854	GVVTSVEPGTPTVLRWAR; GVVTSVEPGTPTVLR	0.977702
Q0VGY8	protein TANC1 [Mus musculus]	Tanc1	mmR338; mmR348	TSIRLPWHNTAGGR	0.977711
Q8CGC7	bifunctional aminoacyl-tRNA synthetase [Mus musculus]	Eprs	mmR1152	LNQWCNVVRWEFK	0.978485
P70257	nuclear factor 1 X-type isoform 3 [Mus musculus]	Nfix	mmR343	LDFCSALSSQGSSPR	0.978782
Q9DBR1	5'-3' exoribonuclease 2 [Mus musculus]	Xrn2	mmR921	MIQNQNAAFQPNQYQMLGGPGGYPPRR	0.980197
Q9DBR1	5'-3' exoribonuclease 2 [Mus musculus]	Xrn2	mmR922	MIQNQNAAFQPNQYQMLGGPGGYPPRR	0.980345
Q8BI84	melanoma inhibitory activity protein 3 precursor [Mus musculus]	Mia3	mmR1881	EFFIPGTRLPPPTHGPQEYPPPPPAVR	0.980899
Q14AX6	cyclin-dependent kinase 12 isoform 1 [Mus musculus]	Cdk12	mmR1403	TFSGSVSHLGESNSYQGTGSVQFPGDQDLRFTR	0.982766
Q5RJH6	protein SMG7 isoform 3 [Mus musculus]	Smg7	mmR861	SPGVFRPEQDPVPR; RSPGVFRPEQDPVPR	0.983256
Q9D011	TTD non-photosensitive 1 protein homolog [Mus musculus]	Mplkip	dmR76	HGGNFSGARFGSPSPGGYPGSYSR	0.98346
Q8BIQ5	cleavage stimulation factor subunit 2 [Mus musculus]	Cstf2	dmR471; mmR478	GMDTRGPVPGPRGPMPSGIQGPNPMNMGAVVPQGSR	0.984859
E9Q9R9	discs large homolog 5 isoform 1 [Mus musculus]	Dlg5	mmR1180	HGNPLLYPNRPSVGTVPR	0.986482
Q8K4P0	WD repeat domain 33 isoform 1 [Mus musculus]	Wdr33	mmR1256	GRGGPGPSQR	0.988355
Q9Z1Y4	thyroid receptor-interacting protein 6 [Mus musculus]	Trip6	mmR25; mmR43	SLPRGALGPPTAHGATLQPHPR	0.989283
Q61191	host cell factor 1 [Mus musculus]	Hcfc1	mmR504	VTGPQATTGTPLVTMRPASQAGK	0.990144
Q60668	heterogeneous nuclear ribonucleoprotein D0 isoform a [Mus musculus]; heterogeneous nuclear ribonucleoprotein D0 isoform c [Mus musculus]	Hnrnpd	mmR278	EQYQQQQQWGSRGGFAGR	0.990382
Q3TLH4	protein PRRC2C [Mus musculus]	Prrc2c	mmR1159	DRDWFPDQGYRGR; DRDWFPDQGYR; DWFPDQGYR	0.990926
Q8K4P0	WD repeat domain 33 isoform 1 [Mus musculus]	Wdr33	mmR1060	EFNEGDGRGAAR	0.991502
P27048	small nuclear ribonucleoprotein-associated protein B [Mus musculus]	Snrpb	dmR108; dmR112; mmR132	VPLAGAAGGPGIGRAAGRGIPAGVPMPQAPAGLAGPVR	0.992149
Q9DBR1	5'-3' exoribonuclease 2 [Mus musculus]	Xrn2	mmR847; dmR851	GSGTSVYTNTALPPANYQGNNYRPLLR	0.993739
Q80V76	pygopus homolog 2 [Mus musculus]	Pygo2	mmR131	VQGGMAGQVPPGYGTGGGGGPQPLRR	0.994237
Q80V76	pygopus homolog 2 [Mus musculus]	Pygo2	mmR130	VQGGMAGQVPPGYGTGGGGGPQPLRR	0.99444
Q5I1X5	relA-associated inhibitor [Mus musculus]	Ppp1r13l	dmR160; dmR167; mmR180	APSPRPGIGPVRQPGPSTPFDYLGR	0.994777
Q8BIQ5	cleavage stimulation factor subunit 2 [Mus musculus]	Cstf2	dmR384	GGPLAEPRPLMAEPR	0.994825
Q9Z1Y4	thyroid receptor-interacting protein 6 [Mus musculus]	Trip6	mmR43	GALGPPTAHGATLQPHPR	0.995525
Q8CGB6	tensin-like C1 domain-containing phosphatase [Mus musculus]	Tns2	mmR559	LLGGCGVASAGRGAGR	0.995545
Q80W00	serine/threonine-protein phosphatase 1 regulatory subunit 10 isoform 1 [Mus musculus]; serine/threonine-protein phosphatase 1 regulatory subunit 10 isoform 2 [Mus musculus]	Ppp1r10	mmR665	GMQHFPPGPGGPMPGPHGGPGGPVGPR	0.995554
P70399	tumor suppressor p53-binding protein 1 [Mus musculus]	Tp53bp1	mmR1317	ASSSHHTSSGTSLSAIHSSGSSGRGAGPLK	0.996946
Q91Z96	BMP-2-inducible protein kinase [Mus musculus]	Bmp2k	mmR443	VLQQLQQGDWR	0.997512
Q3TLH4	protein PRRC2C [Mus musculus]	Prrc2c	mmR282; mmR294	GRGPPPSWASEPERPSILSASELK	0.997721
P99024	tubulin beta-5 chain [Mus musculus]	Tubb5	dmR86	SGPFGQIFRPDNFVFGQSGAGNNWAK	0.997777
Q3UHK8	trinucleotide repeat-containing gene 6A protein [Mus musculus]	Tnrc6a	mmR1299	GMQQPPAQPLSSSQPNLR	0.998001
Q8R311	cutaneous T-cell lymphoma-associated antigen 5 homolog isoform 1 [Mus musculus]	Ctage5	dmR685; mmR690	DPLFPVDPRSQFMR	0.998027
Q9DBR1	5'-3' exoribonuclease 2 [Mus musculus]	Xrn2	mmR864; mmR870; dmR880; mmR883	LMSNMRPQDSWRGPPPLFQQHRFER	0.998746
F6ZDS4	nuclear pore complex-associated protein Tpr [Mus musculus]	Tpr	mmR2231	TDGFAEAIHSPQVAGVPR	0.999123
Q8CGF7	transcription elongation regulator 1 [Mus musculus]	Tcerg1	mmR13; mmR20	GGDGGEGERFNPGELR	0.999585
Q6PEV3	WAS/WASL-interacting protein family member 2 [Mus musculus]	Wipf2	mmR316	GLAPPPPTSATPSLLSNRPPPPAR	0.999699
Q6PEV3	WAS/WASL-interacting protein family member 2 [Mus musculus]	Wipf2	mmR310	GLAPPPPTSATPSLLSNRPPPPAR	0.999699
Q6DID3	protein SCAF8 [Mus musculus]	Scaf8	mmR1094	DHFGFPPEKPWGPRDFDER	1.00014
P61979	heterogeneous nuclear ribonucleoprotein K [Mus musculus]	Hnrnpk	mmR256; dmR258	GRPVGFPMRGR	1.00025
Q91YI6	poly(A) RNA polymerase GLD2 [Mus musculus]	Papd4	mmR131	YSMPPLFHTHYIPDIVR	1.00078
Q9DBR1	5'-3' exoribonuclease 2 [Mus musculus]	Xrn2	mmR883	FERSVGAEPLLPWNR	1.00095
Q91WT8	RNA-binding protein 47 [Mus musculus]	Rbm47	mmR407	GSYLGGYSAGRGIYSR	1.00185
O88291	zinc finger protein 326 [Mus musculus]	Znf326	mmR175	GRGTPAYPESTFGSR	1.0053
Q5NCY0	lysine-specific demethylase 6B [Mus musculus]	Kdm6b	mmR536	DGFLGPPNPR	1.00546
Q8C7E9	cleavage stimulation factor subunit 2 tau variant [Mus musculus]	Cstf2t	mmR406	MLIGEPR	1.00627
A2AQH4	BCL-6 corepressor-like protein 1 [Mus musculus]	Bcorl1	mmR811	ELSLWKPTGLTNMYPR	1.00629
P58871	182 kDa tankyrase-1-binding protein [Mus musculus]	Tnks1bp1	mmR66	GLPSKPALPAKPSLLVPVGPRPPR	1.00679
Q9DBR1	5'-3' exoribonuclease 2 [Mus musculus]	Xrn2	dmR847; mmR851	GSGTSVYTNTALPPANYQGNNYRPLLR	1.00716
P59759	MKL/myocardin-like protein 2 isoform 3 [Mus musculus]	Mkl2	mmR798	KVFTNSAPNTVLQYQR; VFTNSAPNTVLQYQR; VFTNSAPNTVLQYQRQPGPTNQQPFVSK	1.00778
Q8VCE4	hypothetical protein LOC225995 [Mus musculus]	No match	mmR13	AAEPLTFRVPWK	1.00862
Q61687	transcriptional regulator ATRX [Mus musculus]	Atrx	dmR2464	GMYQSVAGGMQPPPLQRAPPPTVR	1.00919
Q32P12	hypothetical protein LOC217216 [Mus musculus]	No match	mmR274	SSPQNYGPGQPLQSPR	1.00927
Q67FY2	B-cell CLL/lymphoma 9-like protein [Mus musculus]	Bcl9l	mmR983; mmR991	SPQVLSSSLGVRSPTGSPSRLK	1.01179
Q99PP7	E3 ubiquitin-protein ligase TRIM33 isoform 1 [Mus musculus]	Trim33	mmR531	TPGQINLAQLR	1.01422
Q8R326	paraspeckle component 1 [Mus musculus]	Pspc1	mmR520	TGSETPQAPMSGVGPVSGGPGGFGRGSQGGNFEGPNKR	1.01425
Q148V8	family with sequence similarity 83, member H [Mus musculus]	Fam83h	mmR476	LRAGRPGFADPDDFALGAGHR	1.01432
Q3TLH4	protein PRRC2C [Mus musculus]	Prrc2c	mmR1159; mmR1161	DRDWFPDQGYRGR; DWFPDQGYRGR	1.01465
Q8K371	angiomotin-like protein 2 [Mus musculus]	Amotl2	mmR198; mmR208	SQQGPQPRGPPAEGPEPR	1.0155
Q9CW46	ribonucleoprotein PTB-binding 1 [Mus musculus]	Raver1	mmR605	LPPEPGLPDSYGFDYPTDVGPRR	1.0158
Q9CW46	ribonucleoprotein PTB-binding 1 [Mus musculus]	Raver1	mmR604	LPPEPGLPDSYGFDYPTDVGPRR	1.0158
P27048	small nuclear ribonucleoprotein-associated protein B [Mus musculus]	Snrpb	dmR108; dmR112	VPLAGAAGGPGIGRAAGRGIPAGVPMPQAPAGLAGPVR	1.01643
Q67FY2	B-cell CLL/lymphoma 9-like protein [Mus musculus]	Bcl9l	mmR677	VREELLRHQLLEK; EELLRHQLLEK	1.01744
O55201	transcription elongation factor SPT5 [Mus musculus]	Supt5h	mmR690	ISSPMHPSAEGQHGGFGSPGGMSR	1.01755
Q3UJB0	splicing factor 3b, subunit 2 [Mus musculus]	Sf3b2	mmR188; mmR205	MGTAVPRPPQDMGQLGVRTPLGPR	1.01823
Q8R0G9	nuclear pore complex protein Nup133 [Mus musculus]	Nup133	mmR30	GPLVGIGPTSTPR; RGPLVGIGPTSTPR	1.01889
O88291	zinc finger protein 326 [Mus musculus]	Znf326	mmR173	GRENYSSYSSFSSPHMKPAPVGSR; ENYSSYSSFSSPHMKPAPVGSR	1.01945
Q9CXK9	RNA-binding protein 33 [Mus musculus]	Rbm33	mmR343; mmR359	EHRPALLPTQPSVVAHSPR	1.02029
Q8K4P0	WD repeat domain 33 isoform 1 [Mus musculus]	Wdr33	mmR16	FFHMPR	1.02084
Q8BM55	transmembrane protein 214 [Mus musculus]	Tmem214	mmR27	RPGASSGGRGGGGGSDR	1.02103
A2AGH6	mediator of RNA polymerase II transcription subunit 12 [Mus musculus]	Med12	dmR1999; mmR2020	HLQQRPSGYVHQQAPTYGHGLTSTQR	1.02252
Q3TIX6	far upstream element (FUSE) binding protein 3 [Mus musculus]	Fubp3	mmR408; mmR418	IFTIRGAPQQMEVAR	1.02452
Q8VI33	adenylate kinase isoenzyme 6 isoform 1 [Mus musculus]	Taf9	mmR128	YCLTAPNYRLK; YCLTAPNYR	1.02454
Q9Z1A1	protein TFG [Mus musculus]	Tfg	mmR382	NRPPFGQGYAQPGPGYR	1.02533
Q9Z1A1	protein TFG [Mus musculus]	Tfg	mmR397	NRPPFGQGYAQPGPGYR	1.02564
P30999	catenin delta-1 isoform 1 [Mus musculus]	Ctnnd1	mmR249	YRPSMEGYRAPSR	1.02572
Q6NXH3	vasculin isoform 2 [Mus musculus]	Gpbp1	mmR46; mmR59	RHNSSDGFDSGIGRPNGGNFGR	1.02581
Q3U0V1	far upstream element-binding protein 2 [Mus musculus]	Khsrp	dmR414; dmR416	SGPPGPPGAPGMPPGGRGRGR; GRGRGQGNWGPPGGEMTFSIPTHK	1.02642
Q6A098	selenocysteine insertion sequence-binding protein 2-like [Mus musculus]	Secisbp2l	mmR78	QFPLYNNDIR	1.02646
Q8C7E9	cleavage stimulation factor subunit 2 tau variant [Mus musculus]	Cstf2t	mmR327	GQMQISDPRPPMPR	1.02647
Q8CI61	BAG family molecular chaperone regulator 4 [Mus musculus]	Bag4	dmR108; mmR110	AGGGHQEQPPYPGYNSNYWNSVRPR	1.02797
Q61033	lamina-associated polypeptide 2 isoform alpha [Mus musculus]	Tmpo	mmR87	GPPDFSSDEEREPTPVLGSGASVGRGR	1.02945
P29341	polyadenylate-binding protein 1 [Mus musculus]	Pabpc1	mmR481; dmR493; mmR506	VMSTQRVANTSTQTMGPRPAAAAAAATPAVR	1.0297
A2AJK6	chromodomain-helicase-DNA-binding protein 7 [Mus musculus]	Chd7	mmR147	HGQSFVDGGSMWGPR	1.02997
Q7TSC1	protein PRRC2A isoform 1 [Mus musculus]	Prrc2a	mmR2103	APPSTYSGVFR	1.03021
P09450	transcription factor jun-B [Mus musculus]	Junb	mmR56	GPGARGPGPEGSGAGSYFSGQGSDTGASLK	1.0332
Q08775	runt-related transcription factor 2 isoform type II [Mus musculus]	Runx2	mmR472	QFPSISSLTESR; QFPSISSLTESRFSNPR	1.03478
Q64127	transcription intermediary factor 1-alpha [Mus musculus]	Trim24	mmR469	FPTQISLAQLR	1.03592
Q9Z1A1	protein TFG [Mus musculus]	Tfg	mmR382; mmR397	NRPPFGQGYAQPGPGYR	1.03729
Q8CI08	SLAIN motif-containing protein 2 isoform a [Mus musculus]	Slain2	mmR551	SGLPRPSAPSAGGIPVPR	1.04189
Q3UJB0	splicing factor 3b, subunit 2 [Mus musculus]	Sf3b2	dmR228; mmR230	VAAPVGPVVPTPTVLPMGAPVPRPR	1.0435
Q8BM75	AT-rich interactive domain-containing protein 5B [Mus musculus]	Arid5b	mmR1142	GIFTSPTNSQQLYR	1.04356
Q8K1I7	WAS/WASL-interacting protein family member 1 [Mus musculus]	Wipf1	mmR150	ATSAKPFSPPSGPGRFPAPSPGHR	1.04427
Q8JZP9	GAS2-like protein 1 isoform beta [Mus musculus]	Gas2l1	mmR630	SSLAGPEPSLTWARGR; SSLAGPEPSLTWAR	1.04457
P70662	LIM domain-binding protein 1 isoform 3 [Mus musculus]	Ldb1	mmR280	WQRMVAPPAEPAR	1.04457
P04627	serine/threonine-protein kinase A-Raf isoform 1 [Mus musculus]	Araf	mmR246	STSTPNVHMVSTTAPMDSSLMQFTAQSFSTDAAGRGGDGAPR	1.04466
Q60668	heterogeneous nuclear ribonucleoprotein D0 isoform a [Mus musculus]; heterogeneous nuclear ribonucleoprotein D0 isoform c [Mus musculus]	Hnrnpd	mmR272	EQYQQQQQWGSRGGFAGR; VAMSKEQYQQQQQWGSRGGFAGR; EQYQQQQQWGSR	1.04673
Q8K327	zinc finger protein 828 [Mus musculus]	Champ1	mmR311	RPTPAVSPGSWKPGPPGSPRPWK	1.04697
Q8BU11	TOX high mobility group box family member 4 [Mus musculus]	Tox4	mmR479	VRINLQQQPPPLQSK	1.04732
Q8K4P0	WD repeat domain 33 isoform 1 [Mus musculus]	Wdr33	mmR805	ENQGPAPQGLMIGHPPQEMR; ENQGPAPQGLMIGHPPQEMRGPHPPSGLLGHGPQEMR	1.04839
Q99PP7	E3 ubiquitin-protein ligase TRIM33 isoform 1 [Mus musculus]	Trim33	mmR607	GNMNCGAFQAHQMR	1.05021
Q9CQB2	hypothetical protein LOC68241 [Mus musculus]	Fam195a	mmR65	QPVPPTALPAHLQPSAQTQGPWPLASSGPR	1.05036
Q62189	U1 small nuclear ribonucleoprotein A [Mus musculus]	Snrpa	mmR157	KAVQGGAAAPVVGAVQPVPGMPPMPQAPR; AVQGGAAAPVVGAVQPVPGMPPMPQAPR	1.05069
Q8VIJ6	splicing factor, proline- and glutamine-rich [Mus musculus]	Sfpq	dmR673; mmR685	FGQGGAGPVGGQGPRGMGPGTPAGYGR	1.05071
Q3TJD7	PDZ and LIM domain protein 7 isoform b [Mus musculus]	Pdlim7	mmR103	ALTPPADPPRYTFAPSASLNK	1.05105
Q8BG05	heterogeneous nuclear ribonucleoprotein A3 isoform a [Mus musculus]	Hnrnpa3	mmR52	LFIGGLSFETTDDSLR	1.05166
Q8CCS6	polyadenylate-binding protein 2 [Mus musculus]	Pabpn1	dmR255; mmR259	RTNRPGISTTDRGFPR; TNRPGISTTDRGFPR	1.05275
Q62188	dihydropyrimidinase-related protein 3 isoform 2 [Mus musculus]	Dpysl3	mmR550	NLHQSGFSLSGTQVDEGVR	1.05518
E9Q9R9	discs large homolog 5 isoform 1 [Mus musculus]	Dlg5	mmR1172	HGNPLLYPNRPSVGTVPR	1.05598
Q9DD19	ras association domain-containing protein 7 [Mus musculus]	Rassf7	mmR133	ALTFNLR; ALTFNLRCPK	1.05687
Q99MU3	double-stranded RNA-specific adenosine deaminase isoform 3 [Mus musculus]	Adar	mmR102	SVTLRNQGFHIGPPLPPPHSR	1.05774
Q61602	transcriptional activator GLI3 [Mus musculus]	Gli3	mmR220	SLHSSPSLSMISAAR	1.05903
Q8C7E9	cleavage stimulation factor subunit 2 tau variant [Mus musculus]	Cstf2t	mmR322; mmR327	GQMQISDPRPPMPR	1.05905
Q3UHK8	trinucleotide repeat-containing gene 6A protein [Mus musculus]	Tnrc6a	mmR1281	NGNPNMFGVGNTAAQPR	1.06023
Q6KCD5	nipped-B-like protein isoform A [Mus musculus]	Nipbl	mmR154	LSQNSMHSSPASSNYQQTTISHSPSSR	1.0618
Q8K4P0	WD repeat domain 33 isoform 1 [Mus musculus]	Wdr33	mmR776	GMQGPPHPHGIQGGPASQGIQGPLMGLNPR	1.06187
A2BH40	AT-rich interactive domain-containing protein 1A [Mus musculus]	Arid1a	mmR1277	AAGPGLGSVAMGPR; AAGPGLGSVAMGPRQHYPYGGPYDR	1.06377
P54823	probable ATP-dependent RNA helicase DDX6 [Mus musculus]	Ddx6	mmR22	TENPVIMGLSSQNGQLRGPVK	1.06433
Q8VDM6	heterogeneous nuclear ribonucleoprotein U-like protein 1 isoform 1 [Mus musculus]	Hnrnpul1	dmR645; mmR664	GGFQNRGGGGGSGGGGGNYRGGFNR	1.06508
Q8CH02	SURP and G-patch domain-containing protein 1 [Mus musculus]	Sugp1	mmR640	FRPNPLNNPRRPYY	1.06526
Q61696	heat shock 70 kDa protein 1B [Mus musculus]	Hspa1a	mmR469	FELSGIPPAPR	1.06677
Q5I1X5	relA-associated inhibitor [Mus musculus]	Ppp1r13l	mmR137; dmR144	TPIYLQPDTYSSLDRAPSPRPR	1.06834
Q3TC46	protein PAT1 homolog 1 [Mus musculus]	Patl1	mmR316	VGQMLPPAPSFR	1.06903
Q9WU42	nuclear receptor corepressor 2 [Mus musculus]	Ncor2	mmR1595	GVTGVDLYRGHIPLAFDPTSIPR	1.06967
Q5I1X5	relA-associated inhibitor [Mus musculus]	Ppp1r13l	mmR137; dmR142	TPIYLQPDTYSSLDRAPSPRPR	1.06979
Q8CHY6	transcriptional repressor p66 alpha isoform a [Mus musculus]; transcriptional repressor p66 alpha isoform b [Mus musculus]	Gatad2a	mmR245	LGPQASSQVVMPPLVR	1.07263
Q3TLH4	protein PRRC2C [Mus musculus]	Prrc2c	mmR723	WLMMQSYMDPR	1.07286
Q5I1X5	relA-associated inhibitor [Mus musculus]	Ppp1r13l	dmR142; mmR144	TPIYLQPDTYSSLDRAPSPRPR	1.07299
P27048	small nuclear ribonucleoprotein-associated protein B [Mus musculus]	Snrpb	mmR108	VPLAGAAGGPGIGR	1.07319
P27048	small nuclear ribonucleoprotein-associated protein B [Mus musculus]	Snrpb	dmR147; mmR172	GVGGPSQQVMTPQGRGTVAAAAAAATASIAGAPTQYPPGR	1.07479
Q9DBR1	5'-3' exoribonuclease 2 [Mus musculus]	Xrn2	mmR895	SVGAEPLLPWNR	1.07699
Q3UJB0	splicing factor 3b, subunit 2 [Mus musculus]	Sf3b2	mmR188; mmR199	MGTAVPRPPQDMGQLGVR	1.07734
Q9CQF3	cleavage and polyadenylation specificity factor subunit 5 [Mus musculus]	Nudt21	mmR15	SQTGWPRGVNQFGNK	1.0804
P09405	nucleolin [Mus musculus]	Ncl	mmR653; mmR657	GEGGFGGRGGGR	1.08092
P09405	nucleolin [Mus musculus]	Ncl	dmR657	GEGGFGGRGGGR	1.08092
Q9WU42	nuclear receptor corepressor 2 [Mus musculus]	Ncor2	mmR1319	EQHHIRGSITQGIPR	1.08132
Q3U0V1	far upstream element-binding protein 2 [Mus musculus]	Khsrp	dmR412; dmR416	SGPPGPPGAPGMPPGGRGRGR	1.0817
Q61696	heat shock 70 kDa protein 1B [Mus musculus]	Hspa1a	mmR311	FEELCSDLFR	1.0826
Q3TLH4	protein PRRC2C [Mus musculus]	Prrc2c	mmR2766; mmR2775	QRAEVLQSTQRFFSEQQQNK	1.08278
Q64152	transcription factor BTF3 isoform 1 [Mus musculus]	Btf3	mmR19; mmR39	ARGGWPGAEATPSLPLGGSRGR	1.08559
Q7TSC1	protein PRRC2A isoform 1 [Mus musculus]	Prrc2a	mmR41	SLEIQKPAVAPR	1.08631
Q3UJB0	splicing factor 3b, subunit 2 [Mus musculus]	Sf3b2	dmR205; mmR228; dmR230	TPLGPRVAAPVGPVVPTPTVLPMGAPVPRPR	1.08686
Q9JIX8	apoptotic chromatin condensation inducer in the nucleus isoform 2 [Mus musculus]	Acin1	mmR29	GVDYGSGRGQSGPFEGR	1.08796
Q923D5	WW domain-binding protein 11 [Mus musculus]	Wbp11	mmR192	AVSILPLLGHGVPR	1.09048
Q8BIQ5	cleavage stimulation factor subunit 2 [Mus musculus]	Cstf2	mmR471; dmR478	GMDTRGPVPGPRGPMPSGIQGPNPMNMGAVVPQGSR	1.09553
Q80U78	pumilio homolog 1 isoform 1 [Mus musculus]	Pum1	mmR797	YRSASSASSLFSPSSTLFSSSR	1.09784
Q5I1X5	relA-associated inhibitor [Mus musculus]	Ppp1r13l	mmR388	LQNAFWEHGAGR	1.09799
Q8CHY6	transcriptional repressor p66 alpha isoform b [Mus musculus]	Gatad2a	mmR221	IPGSIIPPPLVRGGQQVSAK; IPGSIIPPPLVR	1.098
Q8C7E9	cleavage stimulation factor subunit 2 tau variant [Mus musculus]	Cstf2t	mmR322	GQMQISDPRPPMPR	1.09899
Q8BVQ5	protein phosphatase methylesterase 1 [Mus musculus]	Ppme1	mmR16	LPSRPPLPGSGGSQSGAK	1.0993
Q9D2Q3	hypothetical protein LOC68277 [Mus musculus]	No match	mmR218	FQQQNRLPIGDQLQSVLGSAGHK	1.09966
Q3UJB0	splicing factor 3b, subunit 2 [Mus musculus]	Sf3b2	mmR188	MGTAVPRPPQDMGQLGVRTPLGPR	1.10186
P61406	telomerase-binding protein EST1A [Mus musculus]	Smg6	mmR405; mmR432	GRGILILPAHTALSVSSSGSPESTPLGPR	1.10242
Q8VI24	DNA-binding protein SATB2 [Mus musculus]	Satb2	mmR347	LLAHQHPQAINQQFLNHPPIPR	1.1035
Q9R1C7	pre-mRNA-processing factor 40 homolog A [Mus musculus]	Prpf40a	mmR51	LSGSNLCSSSWVSADGFLRR	1.10369
Q3TX08	N(2),N(2)-dimethylguanosine tRNA methyltransferase isoform 1 [Mus musculus]	Trmt1	mmR561	FQANPEANWGPRPR	1.104
Q9WU42	nuclear receptor corepressor 2 [Mus musculus]	Ncor2	mmR1586	SPHSTVPEHHPHPISPYEHLLR; SPHSTVPEHHPHPISPYEHLLRGVTGVDLYR	1.1065
Q9CQB2	hypothetical protein LOC68241 [Mus musculus]	Fam195a	mmR35; mmR65	CRQPVPPTALPAHLQPSAQTQGPWPLASSGPR	1.11015
Q9D219	B-cell CLL/lymphoma 9 protein [Mus musculus]	Bcl9	mmR1253	IIPSEKPSQTLQYFPRGEVPGR; IIPSEKPSQTLQYFPR	1.11177
Q3U0V1	far upstream element-binding protein 2 [Mus musculus]	Khsrp	mmR414; dmR416	GRGRGQGNWGPPGGEMTFSIPTHK	1.1123
Q8CGZ0	calcium homeostasis endoplasmic reticulum protein [Mus musculus]	Cherp	mmR684	DIRLPPPMPPSER	1.11308
Q6A0A9	constitutive coactivator of PPAR-gamma-like protein 1 [Mus musculus]	FAM120A	dmR882; mmR884	HFGPVPPSQGRGRGFAGVCGFGGHYGETVATGPYR	1.1142
Q3U0V1	far upstream element-binding protein 2 [Mus musculus]	Khsrp	mmR412; dmR414; mmR416	SGPPGPPGAPGMPPGGRGRGR	1.11748
A2BH40	AT-rich interactive domain-containing protein 1A [Mus musculus]	Arid1a	mmR775	NPQMPQYTSPQPGSALSPR	1.11761
Q3U0V1	far upstream element-binding protein 2 [Mus musculus]	Khsrp	dmR412; dmR414	SGPPGPPGAPGMPPGGRGRGR	1.11777
Q9WU42	nuclear receptor corepressor 2 [Mus musculus]	Ncor2	mmR1609	GHIPLAFDPTSIPR	1.11864
Q3U0V1	far upstream element-binding protein 2 [Mus musculus]	Khsrp	dmR412; mmR414; mmR416	SGPPGPPGAPGMPPGGRGRGR	1.1235
Q91VX2	ubiquitin-associated protein 2 [Mus musculus]	Ubap2	mmR166	EFKGEENGIDCSQGDKPAERGK; EFKGEENGIDCSQGDKPAER	1.12536
Q3U0V1	far upstream element-binding protein 2 [Mus musculus]	Khsrp	mmR412	SGPPGPPGAPGMPPGGR; SGPPGPPGAPGMPPGGRGR	1.12584
Q3U0V1	far upstream element-binding protein 2 [Mus musculus]	Khsrp	mmR412; mmR414; dmR416	SGPPGPPGAPGMPPGGRGRGR	1.12655
Q80TZ9	arginine-glutamic acid dipeptide repeats protein [Mus musculus]	Rere	mmR1408	MASLTSDPLAR	1.12682
Q61687	transcriptional regulator ATRX [Mus musculus]	Atrx	dmR2457; mmR2464	GMYQSVAGGMQPPPLQRAPPPTVR	1.12716
Q8BIQ5	cleavage stimulation factor subunit 2 [Mus musculus]	Cstf2	mmR308	AAMQRGALPTNVPTPR	1.1288
Q67FY2	B-cell CLL/lymphoma 9-like protein [Mus musculus]	Bcl9l	mmR983; dmR991	SPQVLSSSLGVRSPTGSPSRLK	1.12955
Q3UJB0	splicing factor 3b, subunit 2 [Mus musculus]	Sf3b2	dmR205; dmR228; mmR230	TPLGPRVAAPVGPVVPTPTVLPMGAPVPRPR	1.13143
Q9WU42	nuclear receptor corepressor 2 [Mus musculus]	Ncor2	mmR1682; mmR1687	ADMLRGLSPR	1.13149
E9Q2I4	hypothetical protein LOC238317 [Mus musculus]	Elmsan1	mmR317	SMAPYPFSHNPDMNPELRK	1.13173
Q80W00	serine/threonine-protein phosphatase 1 regulatory subunit 10 isoform 2 [Mus musculus]	Ppp1r10	dmR737; dmR752	SGGGPPNGRGGPGGGGMVGGGGHRPHEGPGGSMGSGHR	1.1339
Q61687	transcriptional regulator ATRX [Mus musculus]	Atrx	mmR2457; mmR2464	GMYQSVAGGMQPPPLQRAPPPTVR	1.13513
Q3TIX6	far upstream element (FUSE) binding protein 3 [Mus musculus]	Fubp3	mmR408	IFTIRGAPQQMEVAR	1.13534
F6ZDS4	nuclear pore complex-associated protein Tpr [Mus musculus]	Tpr	dmR2174; mmR2179	RQSVGRGLQLTPGIGGMQQHFFDDEDR	1.13543
Q9CY57	Friend of PRMT1 protein [Mus musculus]	Chtop	mmR135	GGMSLRGQNLLR	1.13633
P62320	small nuclear ribonucleoprotein Sm D3 [Mus musculus]	Snrpd3	dmR118	GRGMGRGNIFQK	1.13719
Q8CHC8	ADNP homeobox protein 2 [Mus musculus]	Adnp2	mmR600	AGTSQNTTFFTSGSILR	1.14117
Q810L4	transmembrane protein 39B [Mus musculus]	Tmem39b	mmR149	RFIGSIVKEASQR	1.1412
Q6ZPV2	DNA helicase INO80 [Mus musculus]	Ino80	mmR1427	ATNSPASITGSVSDTVNGISIQEVPAAGRGHSAR	1.1418
Q8BTI8	serine/arginine repetitive matrix protein 2 [Mus musculus]	Srrm2	mmR2345	MAPALSGANLTSPRVPLSAYDR	1.14286
Q9DBR1	5'-3' exoribonuclease 2 [Mus musculus]	Xrn2	mmR816	RPVHLDQAAFR; DRRPVHLDQAAFR	1.14403
Q8C9B9	death-inducer obliterator 1 isoform 3 [Mus musculus]	Dido1	mmR1766	GGGPQPQFPGQREPAPR	1.14406
Q80WC3	trinucleotide repeat-containing gene 18 protein isoform B [Mus musculus]	Tnrc18	mmR734	WSADPAAHLATNPWLPR	1.14493
A2AGH6	mediator of RNA polymerase II transcription subunit 12 [Mus musculus]	Med12	dmR1901; mmR1912	TSVYRQQQPTVPQGQR	1.14499
Q6Y7W8	PERQ amino acid-rich with GYF domain-containing protein 2 isoform b [Mus musculus]; PERQ amino acid-rich with GYF domain-containing protein 2 isoform a [Mus musculus]	Gigyf2	mmR154	SFDEVEGVFGRGGGR	1.14511
Q6NXH3	vasculin isoform 2 [Mus musculus]	Gpbp1	dmR46; dmR59; mmR67	RHNSSDGFDSGIGRPNGGNFGR	1.14812
Q6Y7W8	PERQ amino acid-rich with GYF domain-containing protein 2 isoform a [Mus musculus]	Gigyf2	mmR150	SFDEVEGVFGRGGGR; SFDEVEGVFGR	1.14976
P63017	heat shock cognate 71 kDa protein [Mus musculus]	Hspa8	mmR469	FELTGIPPAPR; DNNLLGKFELTGIPPAPR; AMTKDNNLLGKFELTGIPPAPR	1.14978
O09174	alpha-methylacyl-CoA racemase [Mus musculus]	Amacr	mmR47	LGSTGENFLAR	1.15067
Q8BTI8	serine/arginine repetitive matrix protein 2 [Mus musculus]	Srrm2	mmR2253	TAVAPSAVNLADPRTPAASAVNLAGAR	1.15082
Q8BIQ5	cleavage stimulation factor subunit 2 [Mus musculus]	Cstf2	mmR344	GGTLMTVTGDVEPR	1.15234
Q8BTI8	serine/arginine repetitive matrix protein 2 [Mus musculus]	Srrm2	mmR2337	MAPALSGANLTSPRVPLSAYDR; MAPALSGANLTSPR	1.15307
Q04841	DNA-3-methyladenine glycosylase [Mus musculus]	Mpg	mmR34	GALKPVSVTLLPDTEQPPFLGR	1.15349
Q8CHY6	transcriptional repressor p66 alpha isoform b [Mus musculus]	Gatad2a	dmR245; mmR253	LGPQASSQVVMPPLVRGAQIHNIR	1.15408
Q8BIQ5	cleavage stimulation factor subunit 2 [Mus musculus]	Cstf2	mmR319	GALPTNVPTPR	1.15775
Q8BTI8	serine/arginine repetitive matrix protein 2 [Mus musculus]	Srrm2	mmR2295	TPQAPTPANLVVGPR	1.15812
O35691	pinin [Mus musculus]	Pnn	dmR54	LLALSGPGGGRGR	1.15847
O35691	pinin [Mus musculus]	Pnn	mmR54; mmR56	LLALSGPGGGRGR	1.15906
Q3TAQ9	WD repeat domain 36 isoform 1 [Mus musculus]	Wdr36	mmR748	EPPKVPQSAPFFIPTVPGLVPR; VPQSAPFFIPTVPGLVPR	1.15957
Q6PB44	tyrosine-protein phosphatase non-receptor type 23 [Mus musculus]	Ptpn23	mmR1671	QNFLQAHNGQGLR	1.16074
E9QAP7	transcription initiation factor TFIID subunit 4 [Mus musculus]	Taf4	mmR731	QPHNRIMLTTPQQIQLNQLQPVPVVKPTVLPGTK	1.16202
A2AGH6	mediator of RNA polymerase II transcription subunit 12 [Mus musculus]	Med12	mmR1999; mmR2020	HLQQRPSGYVHQQAPTYGHGLTSTQR	1.16268
Q8BJ34	limkain-b1 [Mus musculus]	Marf1	mmR756	QVSPLLTSQSWSPR	1.16317
Q3UJB0	splicing factor 3b, subunit 2 [Mus musculus]	Sf3b2	dmR205; mmR228; mmR230	TPLGPRVAAPVGPVVPTPTVLPMGAPVPRPR	1.16396
E9PYL2	proline rich 12 [Mus musculus]	Prr12	mmR114	GPQPGPSASSLLSQFR	1.16432
P29341	polyadenylate-binding protein 1 [Mus musculus]	Pabpc1	dmR493; mmR506	VANTSTQTMGPRPAAAAAAATPAVR	1.16721
Q3U7U3	F-box only protein 7 [Mus musculus]	Fbxo7	mmR519	SADSRLPFL	1.16925
Q63932	dual specificity mitogen-activated protein kinase kinase 2 [Mus musculus]	Map2k2	mmR112	LIHLEIKPAVR; KLIHLEIKPAVR	1.16945
Q9Z103	activity-dependent neuroprotector homeobox protein [Mus musculus]	Adnp	mmR105	SFGLGAEQRPPAAAR	1.16992
Q9Z103	activity-dependent neuroprotector homeobox protein [Mus musculus]	Adnp	mmR111	SFGLGAEQRPPAAAR	1.16992
Q8N7N6	adapter protein CIKS [Mus musculus]	Traf3ip2	mmR328	DFSFPRLPR	1.17418
Q8BH74	nuclear pore complex protein Nup107 [Mus musculus]	Nup107	mmR60	TPSSFRQPFVTPSSR	1.17496
Q8R089	probable fibrosin-1 [Mus musculus]	Fbrs	mmR414	LYSLDPAHPLLYSR	1.17507
Q8BTI8	serine/arginine repetitive matrix protein 2 [Mus musculus]	Srrm2	mmR2173	MSQVPAPVPLMSLR	1.17527
Q8K2A7	integrator complex subunit 10 [Mus musculus]	Ints10	dmR15	SAQGDCEFLVQRAR	1.17765
Q3UHJ0	AP2 associated kinase 1 isoform 2 [Mus musculus]	Aak1	mmR391	AGQTQPNPGILPIQPALTPR	1.17803
E9PZJ8	activating signal cointegrator 1 complex subunit 3 isoform 2 [Mus musculus]	Ascc3	dmR773	QVRELFSDGFSIHHAGMLRQDR	1.17857
Q571G4	protein lin-54 homolog [Mus musculus]	Lin54	mmR435	QVVPKPINSTSQIVTTSQPQQR	1.18245
Q5PRE5	hypothetical protein LOC212127 [Mus musculus]	Proser1	dmR613; mmR624	GPAHPGTPVRGTLGLSGALGR	1.18479
Q8BQ46	TATA-binding protein-associated factor 2N [Mus musculus]	Taf15	mmR498; mmR505	SRGAYGGDRGGSGSGSGGYGGDR	1.18866
Q8BQ46	TATA-binding protein-associated factor 2N [Mus musculus]	Taf15	dmR498	SRGAYGGDRGGSGSGSGGYGGDR	1.18866
Q3TLH4	protein PRRC2C [Mus musculus]	Prrc2c	mmR2631	AFGSGIDIKPGTPPIGGR	1.1906
Q61191	host cell factor 1 [Mus musculus]	Hcfc1	mmR608	VASSPVMVSNPATR	1.19254
Q8R311	cutaneous T-cell lymphoma-associated antigen 5 homolog isoform 1 [Mus musculus]	Ctage5	mmR535	LSPLLPGGGGR; LSPLLPGGGGRGSR	1.19259
A2AIV2	protein virilizer homolog [Mus musculus]	Kiaa1429	mmR1704	GAFHSQNRFFTPPASK	1.19462
Q8VEK3	heterogeneous nuclear ribonucleoprotein U [Mus musculus]	Hnrnpu	mmR754; mmR762	GGMPNRGNYNQNFR	1.19596
A2AAY5	SH3 and PX domain-containing protein 2B [Mus musculus]	Sh3pxd2b	mmR818	AKPFLSNSSVGQDDMRGK	1.20062
Q91V81	RNA-binding protein 42 [Mus musculus]	Rbm42	mmR124	AAAAATVVPPMVGGPPFVGPVGFGPADRGHLDSPEAR	1.20141
Q8BU11	TOX high mobility group box family member 4 [Mus musculus]	Tox4	mmR421	GLQVGQTSTATIQPSQQAQIVTR	1.20259
Q8BTI8	serine/arginine repetitive matrix protein 2 [Mus musculus]	Srrm2	mmR2323	TPAGLAPTNLSSSR	1.20462
Q3U3C9	genetic suppressor element 1 isoform 1 [Mus musculus]	Gse1	mmR232	SFRPYHTAEDLR	1.20567
Q9CW46	ribonucleoprotein PTB-binding 1 [Mus musculus]	Raver1	mmR573	SRLLSPIASNR	1.20617
Q9Z1A1	protein TFG [Mus musculus]	Tfg	dmR382; mmR397	NRPPFGQGYAQPGPGYR	1.2065
Q8VHR5	transcriptional repressor p66-beta [Mus musculus]	Gatad2b	mmR265	SATNTTLPHMLMSQR	1.20782
Q99KW3	TRIO and F-actin-binding protein isoform 5 [Mus musculus]	Triobp	mmR1571	SSLKIGEQR	1.20972
Q8BFW7	lipoma-preferred partner homolog isoform 1 [Mus musculus]	Lpp	mmR250	SAQPSPHYMAGPSSGQIYGPGPR	1.2098
P27048	small nuclear ribonucleoprotein-associated protein B [Mus musculus]	Snrpb	mmR147	GVGGPSQQVMTPQGR	1.21016
Q80U58	pumilio homolog 2 isoform 1 [Mus musculus]	Pum2	mmR674	YRSASSTSSLFSSSSQLFPPSR	1.21067
Q8VIJ6	splicing factor, proline- and glutamine-rich [Mus musculus]	Sfpq	mmR673; dmR685	FGQGGAGPVGGQGPRGMGPGTPAGYGR	1.21109
Q69ZK6	probable JmjC domain-containing histone demethylation protein 2C isoform 1 [Mus musculus]	Jmjd1c	mmR717	WVHPENAVNAEASLRR	1.213
Q8BTI8	serine/arginine repetitive matrix protein 2 [Mus musculus]	Srrm2	mmR2198	IPAASAAAMNLASAR	1.21528
Q9CQB2	hypothetical protein LOC68241 [Mus musculus]	Fam195a	mmR35	CRQPVPPTALPAHLQPSAQTQGPWPLASSGPR	1.21819
Q9D0E1	heterogeneous nuclear ribonucleoprotein M isoform a [Mus musculus]	Hnrnpm	mmR495	MGAGMGFGLER	1.21962
P61979	heterogeneous nuclear ribonucleoprotein K [Mus musculus]	Hnrnpk	dmR256; mmR258	GRPVGFPMRGRGGFDR; GRPVGFPMRGR	1.21963
Q6ZPV2	DNA helicase INO80 [Mus musculus]	Ino80	mmR1432	ATNSPASITGSVSDTVNGISIQEVPAAGRGHSAR	1.22334
Q9QX47	protein SON [Mus musculus]	Son	mmR931	LGHDPYRLGHDAYR	1.22858
Q3U182	CREB-regulated transcription coactivator 2 [Mus musculus]	Crtc2	mmR161	GQLFRLPSALNR	1.23
Q9D219	B-cell CLL/lymphoma 9 protein [Mus musculus]	Bcl9	mmR560	GMAPHPNMPGSQMR	1.23009
P70255	nuclear factor 1 C-type isoform a [Mus musculus]	Nfic	mmR354; mmR365	LSSFTQHHRPVIAVHSGIAR	1.23135
Q80W68	kin of IRRE-like protein 1 precursor [Mus musculus]	Kirrel	mmR737	FNSHPFPGAAGYPTYR	1.23186
Q91YU6	leucine zipper putative tumor suppressor 2 [Mus musculus]	Lzts2	mmR168	GAPSLPGFLGPR	1.23291
Q64012	RNA-binding protein Raly short isoform [Mus musculus]	Raly	mmR141	LSPVPVPR	1.23421
Q8C7E9	cleavage stimulation factor subunit 2 tau variant [Mus musculus]	Cstf2t	mmR363	GGTLLSVTGEVEPR	1.23761
Q8K1I7	WAS/WASL-interacting protein family member 1 [Mus musculus]	Wipf1	dmR126; mmR135	DNDSGGSRPPILPPGGR	1.23878
Q8BRG8	transmembrane protein 209 [Mus musculus]	Tmem209	mmR216	LASFSLSPSSPYPTTVGPVESSGLR	1.23883
Q921N6	probable ATP-dependent RNA helicase DDX27 [Mus musculus]	Ddx27	mmR642	ALQEFDLALRGK	1.23924
O70305	ataxin-2 [Mus musculus]	Atxn2	mmR651	TSPAGGTWSSVVSGVPR	1.24067
Q69ZK6	probable JmjC domain-containing histone demethylation protein 2C isoform 1 [Mus musculus]	Jmjd1c	mmR716	WVHPENAVNAEASLRR	1.24217
Q91ZU6	dystonin isoform b [Mus musculus]	Dst	mmR7226	FILADGASQGMAAFRPR	1.24223
Q8VC70	RNA-binding motif, single-stranded-interacting protein 2 isoform a [Mus musculus]	Rbms2	mmR35	KLYVAQQMAPPSPR; LYVAQQMAPPSPR	1.24255
Q7TN75	retrotransposon-derived protein PEG10 isoform 1 [Mus musculus]	Peg10	mmR844; mmR857	LQVTYNCRAPQSGTIQNQYLR	1.24362
Q03347	runt-related transcription factor 1 isoform 1 [Mus musculus]	Runx1	mmR244	ASLNHSTAFNPQPQSQMQDAR	1.24429
Q7TSC1	protein PRRC2A isoform 1 [Mus musculus]	Prrc2a	mmR2128	WMPKPWER	1.24453
Q5I1X5	relA-associated inhibitor [Mus musculus]	Ppp1r13l	mmR122; mmR137; dmR142	GRPSSPRTPIYLQPDTYSSLDRAPSPRPR	1.24466
Q8BTI8	serine/arginine repetitive matrix protein 2 [Mus musculus]	Srrm2	mmR2240	TAVAPSAVNLADPR; TAVAPSAVNLADPRTPAASAVNLAGAR	1.24719
Q8BTI8	serine/arginine repetitive matrix protein 2 [Mus musculus]	Srrm2	mmR2226	TPAAAAAMNLASPR	1.24879
Q8CH18	cell division cycle and apoptosis regulator protein 1 [Mus musculus]	Ccar1	mmR281	AGLLQPPVR	1.25566
Q91V81	RNA-binding protein 42 [Mus musculus]	Rbm42	mmR133	AAAAATVVPPMVGGPPFVGPVGFGPADRGHLDSPEAR	1.25638
Q9WU42	nuclear receptor corepressor 2 [Mus musculus]	Ncor2	mmR1526	QSPLTYEDHGAPFTSHLPR	1.25708
Q61818	retinoic acid-induced protein 1 [Mus musculus]	Rai1	mmR149	TVVPPPNRQYPEQGPQLPFR	1.2576
Q91WE1	sorting nexin-15 [Mus musculus]	Snx15	mmR81	LEEFPAFPR; RLEEFPAFPR	1.26002
Q9WU78	programmed cell death 6-interacting protein isoform 1 [Mus musculus]	Pdcd6ip	mmR745	EPSAPSIPPPAYQSSPAAGHAAAPPTPAPR	1.26118
Q91W39	nuclear receptor coactivator 5 [Mus musculus]	Ncoa5	mmR500	NMGPRPGAPSQGLFGQPSSR	1.26381
D3YXK2	scaffold attachment factor B [Mus musculus]	Safb	mmR890; dmR896	SMSGHSGPGHMMNRGGMSGRGSFAPGGASR	1.26412
Q8CCS6	polyadenylate-binding protein 2 [Mus musculus]	Pabpn1	mmR255	TNRPGISTTDRGFPR	1.26521
P61406	telomerase-binding protein EST1A [Mus musculus]	Smg6	mmR432	GILILPAHTALSVSSSGSPESTPLGPR	1.26805
Q8CI08	SLAIN motif-containing protein 2 isoform a [Mus musculus]	Slain2	mmR538; mmR551	SGLPRPSAPSAGGIPVPR	1.26812
Q8C5L3	CCR4-NOT transcription complex subunit 2 isoform d [Mus musculus]	Cnot2	mmR137	GILPMNPR	1.26915
P27048	small nuclear ribonucleoprotein-associated protein B [Mus musculus]	Snrpb	mmR108; mmR112	VPLAGAAGGPGIGRAAGR	1.26992
P56959	RNA-binding protein FUS [Mus musculus]	Fus	mmR495	GGGDRGGFGPGK	1.27075
Q9JHW4	selenocysteine-specific elongation factor [Mus musculus]	Eefsec	mmR543	AGRGETTKPEEGTERPEPIQPVTLNLSFK	1.27152
Q99MU3	double-stranded RNA-specific adenosine deaminase isoform 3 [Mus musculus]	Adar	dmR30; mmR42	WRYPQPQGPESYPR	1.27436
P70257	nuclear factor 1 X-type isoform 2 [Mus musculus]	Nfix	mmR390	ATASALHFPSTSIIQQSSPYFTHPTIR	1.27869
D3Z3N4	heterogeneous nuclear ribonucleoprotein H3 [Mus musculus]	Hnrnph3	mmR323	MGMGNSYSGGYGAPDGLGGYGRGGGGSGGYYGQGGMSGGGWR; MGMGNSYSGGYGAPDGLGGYGR	1.28302
F8VQG7	Nedd4 binding protein 2 [Mus musculus]	N4bp2	mmR334	VWRGGEGASAYQVQEAPASQPVR	1.28543
O08583	THO complex subunit 4 [Mus musculus]	Alyref	mmR203	NRGSGGFGGGGTR	1.28579
Q64152	transcription factor BTF3 isoform 1 [Mus musculus]	Btf3	mmR39	GGWPGAEATPSLPLGGSRGR	1.28678
Q8C2Q3	RNA-binding protein 14 [Mus musculus]	Rbm14	mmR657	YSGSYNDYLR	1.29566
Q0VGY8	protein TANC1 [Mus musculus]	Tanc1	mmR338	TSIRLPWHNTAGGR	1.29826
E9Q8I7	nuclear transcription factor, X-box binding-like 1 [Mus musculus]	Nfxl1	mmR18; mmR38	GRATAVPLSGNGVPFGGAGGGR	1.30071
Q3U5F4	yrdC domain-containing protein, mitochondrial precursor [Mus musculus]	Yrdc	dmR32	AAVAAGMGLSDGPASSGRGCR	1.3047
Q3U5F4	yrdC domain-containing protein, mitochondrial precursor [Mus musculus]	Yrdc	dmR29	AAVAAGMGLSDGPASSGRGCR	1.30621
Q3U5F4	yrdC domain-containing protein, mitochondrial precursor [Mus musculus]	Yrdc	mmR29; mmR32	AAVAAGMGLSDGPASSGRGCR	1.31055
Q8CG79	apoptosis-stimulating of p53 protein 2 [Mus musculus]	Tp53bp2	mmR358	VAAVGPYIQSSTMPR	1.31242
D3YXK2	scaffold attachment factor B [Mus musculus]	Safb	dmR890; mmR896	SMSGHSGPGHMMNRGGMSGRGSFAPGGASR	1.31259
Q99JR8	SWI/SNF-related matrix-associated actin-dependent regulator of chromatin subfamily D member 2 isoform 2 [Mus musculus]	Smarcd2	mmR118	RLLVPQAQPPMPAQR	1.31721
Q14B71	cell division cycle-associated protein 2 [Mus musculus]	Cdca2	mmR98; mmR108	STVGVRGSPETNCLIR	1.31772
P61979	heterogeneous nuclear ribonucleoprotein K [Mus musculus]	Hnrnpk	mmR305	ARNLPLPPPPPPR	1.32477
Q3TLH4	protein PRRC2C [Mus musculus]	Prrc2c	dmR1161	DRDWFPDQGYRGR; DWFPDQGYRGR	1.32655
Q8BHL8	proteasome inhibitor PI31 subunit [Mus musculus]	Psmf1	mmR231	VLIDPSSGLPNRLPPGAVPPGAR	1.32978
Q7TPM1	protein PRRC2B isoform 1 [Mus musculus]	Prrc2b	mmR690	TFYPHHPQMLGFDPR	1.33406
Q3U0V1	far upstream element-binding protein 2 [Mus musculus]	Khsrp	mmR414	SGPPGPPGAPGMPPGGRGR	1.33433
Q64152	transcription factor BTF3 isoform 1 [Mus musculus]	Btf3	mmR37	GGWPGAEATPSLPLGGSRGR; GGWPGAEATPSLPLGGSR	1.33499
P49312	heterogeneous nuclear ribonucleoprotein A1 isoform b [Mus musculus]; heterogeneous nuclear ribonucleoprotein A1 isoform a [Mus musculus]	Hnrnpa1	dmR206; dmR218	SGSGNFGGGRGGGFGGNDNFGR	1.33507
Q8BIH0	histone deacetylase complex subunit SAP130 [Mus musculus]	Sap130	mmR437	SSLIPISGHR	1.33676
Q61545	RNA-binding protein EWS [Mus musculus]	Ewsr1	dmR562; mmR564	APKPEGFLPPPFPPPGGDRGR	1.33823
Q8CHI8	E1A-binding protein p400 isoform 2 [Mus musculus]	Ep400	mmR1536	IAQLASIAGPQSR	1.33966
P15806	transcription factor E2-alpha isoform 1 [Mus musculus]; transcription factor E2-alpha isoform 4 [Mus musculus]; transcription factor E2-alpha isoform 7 [Mus musculus]	Tcf3	mmR369	ALASIYSPDHSSNNFSPSPSTPVGSPQGLPGTSQWPR	1.35332
Q3U0V1	far upstream element-binding protein 2 [Mus musculus]	Khsrp	dmR416	SGPPGPPGAPGMPPGGRGRGR; GRGRGQGNWGPPGGEMTFSIPTHK	1.35825
Q3U0V1	far upstream element-binding protein 2 [Mus musculus]	Khsrp	mmR412; mmR414	SGPPGPPGAPGMPPGGRGRGR; SGPPGPPGAPGMPPGGRGR	1.36197
Q924H2	mediator of RNA polymerase II transcription subunit 15 isoform a [Mus musculus]	Med15	mmR641	SPVFNHSLYR	1.36386
Q3U0V1	far upstream element-binding protein 2 [Mus musculus]	Khsrp	dmR414	SGPPGPPGAPGMPPGGRGRGR; GRGRGQGNWGPPGGEMTFSIPTHK; SGPPGPPGAPGMPPGGRGR	1.36599
Q9WVA4	transgelin-3 [Mus musculus]	Tagln2	mmR196	GASQAGMTGYGMPR	1.37566
D3YXK2	scaffold attachment factor B [Mus musculus]	Safb	dmR890	SMSGHSGPGHMMNRGGMSGRGSFAPGGASR	1.37805
Q99MU3	double-stranded RNA-specific adenosine deaminase isoform 3 [Mus musculus]	Adar	mmR123	GTPWRGADGLCSHFR	1.37831
P61961	ubiquitin-fold modifier 1 precursor [Mus musculus]	Ufm1	mmR15	ITLTSDPRLPYK	1.38356
Q3U0V1	far upstream element-binding protein 2 [Mus musculus]	Khsrp	dmR412	SGPPGPPGAPGMPPGGRGRGR; SGPPGPPGAPGMPPGGRGR	1.38882
Q6A0A9	constitutive coactivator of PPAR-gamma-like protein 1 [Mus musculus]	FAM120A	mmR982	GPFPLQVVSVGGPARGRPR	1.39
Q9WU42	nuclear receptor corepressor 2 [Mus musculus]	Ncor2	mmR1742	LAYLPTAPPPFSSR	1.39821
Q8VIJ6	splicing factor, proline- and glutamine-rich [Mus musculus]	Sfpq	mmR685	GMGPGTPAGYGR; GMGPGTPAGYGRGR; FGQGGAGPVGGQGPRGMGPGTPAGYGR	1.40455
Q6TXD4	dynamin-binding protein [Mus musculus]	Dnmbp	mmR589	DIVRGSSNSLPSQAFPER	1.40757
A2AJK6	chromodomain-helicase-DNA-binding protein 7 [Mus musculus]	Chd7	mmR463	SFMGMSSAPR	1.40776
P27048	small nuclear ribonucleoprotein-associated protein B [Mus musculus]	Snrpb	dmR108; mmR112	VPLAGAAGGPGIGRAAGRGIPAGVPMPQAPAGLAGPVR	1.41308
Q69ZK6	probable JmjC domain-containing histone demethylation protein 2C isoform 1 [Mus musculus]	Jmjd1c	mmR1009	SPTHLTVSSTNALR	1.41442
Q8BKI2	trinucleotide repeat-containing gene 6B protein isoform 1 [Mus musculus]	Tnrc6b	mmR1306	MVSALQQQQQQQQQQQRQPSMK	1.41542
Q8VIJ6	splicing factor, proline- and glutamine-rich [Mus musculus]	Sfpq	mmR673	FGQGGAGPVGGQGPRGMGPGTPAGYGR; FGQGGAGPVGGQGPR	1.41944
Q3U0V1	far upstream element-binding protein 2 [Mus musculus]	Khsrp	mmR414; mmR416	GRGRGQGNWGPPGGEMTFSIPTHK	1.43169
P46938	yorkie homolog isoform 2 [Mus musculus]	Yap1	mmR72	TANVPQTVPMRLR	1.43264
Q8CI08	SLAIN motif-containing protein 2 isoform a [Mus musculus]	Slain2	mmR473	SPAAPSPLALRQPVK	1.4346
Q6PHZ5	putative RNA-binding protein 15B [Mus musculus]	Rbm15b	dmR679; mmR683	TRESERNHR	1.44514
Q8VHR5	transcriptional repressor p66-beta [Mus musculus]	Gatad2b	mmR10	MTEDALRLNLLK	1.44533
Q3U0V1	far upstream element-binding protein 2 [Mus musculus]	Khsrp	mmR416	GRGQGNWGPPGGEMTFSIPTHK	1.45034
Q8CHY6	transcriptional repressor p66 alpha isoform b [Mus musculus]	Gatad2a	dmR268; mmR280	QHSSTGPPPLLLAPRASVPSMQIQGQR	1.45107
Q99MD6	thioredoxin reductase 3 isoform 1 [Mus musculus]	Txnrd3	mmR34	LGAVRGGLMSSPPGRR; LGAVRGGLMSSPPGR	1.4602
Q9JLV1	BAG family molecular chaperone regulator 3 [Mus musculus]	Bag3	mmR264	IQGDDWEPRPLR	1.46442
Q60974	nuclear receptor corepressor 1 [Mus musculus]	Ncor1	mmR1583	SHLPTHLDPAMPFHR	1.46494
Q9JLV1	BAG family molecular chaperone regulator 3 [Mus musculus]	Bag3	mmR267	IQGDDWEPRPLR	1.4681
Q3TJD7	PDZ and LIM domain protein 7 isoform b [Mus musculus]	Pdlim7	mmR137	QNGQLLRQPVPDASK	1.46884
Q99MU3	double-stranded RNA-specific adenosine deaminase isoform 3 [Mus musculus]	Adar	mmR97	QLEIWEFPR	1.48404
Q61103	zinc finger protein ubi-d4 [Mus musculus]	Dpf2	mmR78	GPGLASGQLYSYPARR	1.48847
Q8K327	zinc finger protein 828 [Mus musculus]	Champ1	mmR291	KPSPAESPELWKPFPAIASEPR	1.49146
Q9WU42	nuclear receptor corepressor 2 [Mus musculus]	Ncor2	dmR1682; mmR1687	ADMLRGLSPR	1.4944
Q6PHQ9	polyadenylate-binding protein 4 isoform 1 [Mus musculus]	Pabpc4	mmR475; mmR483	HLAPTGNAPASRGLPTTAQR	1.49603
Q8C3F2	constitutive coactivator of PPAR-gamma-like protein 2 [Mus musculus]	Fam120c	mmR57	ITRGSAPLPPPPLPPAAFGAYSGGAGPSR	1.51319
Q8VEK3	heterogeneous nuclear ribonucleoprotein U [Mus musculus]	Hnrnpu	dmR715; mmR730	GNMPQRGGGGGSGGIGYPYPR	1.51401
Q8VEK3	heterogeneous nuclear ribonucleoprotein U [Mus musculus]	Hnrnpu	dmR685; dmR691; mmR696	GRGGFNMRGGNFR	1.51594
Q8C9B9	death-inducer obliterator 1 isoform 3 [Mus musculus]	Dido1	mmR1766; mmR1771	GGGPQPQFPGQREPAPR	1.52832
Q9QX47	protein SON [Mus musculus]	Son	mmR931; mmR938	LGHDPYRLGHDAYR	1.53899
Q6PB70	anoctamin-8 [Mus musculus]	Ano8	mmR963	RPGALLPPGPVLR	1.54637
Q9QY06	myosin-IXb isoform 1 [Mus musculus]	Myo9b	mmR1890	LGFSSPYEGVR	1.54941
Q80W00	serine/threonine-protein phosphatase 1 regulatory subunit 10 isoform 2 [Mus musculus]	Ppp1r10	dmR707; mmR710	GRGGRGGNEPPPPPPFR	1.55019
Q6A0A9	constitutive coactivator of PPAR-gamma-like protein 1 [Mus musculus]	FAM120A	mmR882	HFGPVPPSQGR	1.55025
Q80W00	serine/threonine-protein phosphatase 1 regulatory subunit 10 isoform 2 [Mus musculus]	Ppp1r10	mmR707; dmR710	GRGGRGGNEPPPPPPFR	1.55272
Q60974	nuclear receptor corepressor 1 [Mus musculus]	Ncor1	mmR1656	EQPLGLPYPATR	1.55903
A2AIV2	protein virilizer homolog [Mus musculus]	Kiaa1429	mmR1772; mmR1774	ASRGRGGLGPSWASTNSGSGGSR	1.56143
Q60865	caprin-1 isoform a [Mus musculus]	Caprin1	mmR624	GLMNGYRGPANGFR	1.56224
Q91WJ8	far upstream element-binding protein 1 [Mus musculus]	Fubp1	dmR355; mmR357; mmR359	SVQAGNPGGPGPGGRGRGR	1.56683
Q8VIJ6	splicing factor, proline- and glutamine-rich [Mus musculus]	Sfpq	mmR25; mmR32	GGGGGRGGLHDFRSPPPGMGLNQNR	1.56864
Q60865	caprin-1 isoform a [Mus musculus]	Caprin1	mmR631; mmR638	GPANGFRGGYDGYRPSFSNTPNSGYSQSQFTAPR	1.5734
Q8CCS6	polyadenylate-binding protein 2 [Mus musculus]	Pabpn1	mmR255; mmR259	TNRPGISTTDRGFPR	1.58019
P51175	protoporphyrinogen oxidase [Mus musculus]	Ppox	mmR59	GSDGAIFELGPR	1.58047
Q99MU3	double-stranded RNA-specific adenosine deaminase isoform 3 [Mus musculus]	Adar	mmR30	WRYPQPQGPESYPR	1.58417
Q60865	caprin-1 isoform a [Mus musculus]	Caprin1	dmR638	GPANGFRGGYDGYRPSFSNTPNSGYSQSQFTAPR	1.58596
Q3TWF6	WD repeat-containing protein 70 [Mus musculus]	Wdr70	mmR579	SHKPEPPVAGPGRGGR	1.60591
Q61545	RNA-binding protein EWS [Mus musculus]	Ewsr1	dmR505	GPRGSRGNPSGGGNVQHR	1.60691
Q6PDH0	pleckstrin homology-like domain family B member 1 [Mus musculus]	Phldb1	mmR402	IGTLQDRPPSPFR	1.61023
Q8K298	actin-binding protein anillin [Mus musculus]	Anln	mmR363	LATPGGRGIKPFLER	1.61027
E9Q7D5	Rho guanine nucleotide exchange factor (GEF) 5 [Mus musculus]	Arhgef5	mmR771	GSFSLVPDSTVAR	1.61496
Q99MR6	serrate RNA effector molecule homolog isoform 1 [Mus musculus]	Srrt	mmR839; mmR849	GNYDAFRGQGGYPGKPR	1.61694
Q8VEK3	heterogeneous nuclear ribonucleoprotein U [Mus musculus]	Hnrnpu	dmR685; mmR691; mmR696	GRGGFNMRGGNFR	1.62401
Q6A0A2	la-related protein 4B [Mus musculus]	Larp4b	mmR497	VEPSSLESSPGLGRGR	1.63781
Q6A0A2	la-related protein 4B [Mus musculus]	Larp4b	mmR495	VEPSSLESSPGLGRGR	1.63781
P17710	hexokinase-1 isoform HK1-sb [Mus musculus]	Hk1	dmR518	FLLSESGSGKGAAMVTAVAYRLAEQHR	1.64019
O70133	ATP-dependent RNA helicase A [Mus musculus]	Dhx9	mmR1339	NNFGGDYRGSSGDYR	1.64971
Q91WJ8	far upstream element-binding protein 1 [Mus musculus]	Fubp1	dmR357; mmR359	GRGRGQGNWNMGPPGGLQEFNFIVPTGK	1.66129
Q3TWF6	WD repeat-containing protein 70 [Mus musculus]	Wdr70	mmR576	SHKPEPPVAGPGRGGR	1.66377
Q8BW10	RNA-binding protein NOB1 [Mus musculus]	Nob1	mmR372	QKTDVFAPDYIAGVSPFAENDISSR; TDVFAPDYIAGVSPFAENDISSR	1.66385
Q8C9B9	death-inducer obliterator 1 isoform 3 [Mus musculus]	Dido1	mmR611	RPWPSATLSGTSAR	1.66621
Q6A0A9	constitutive coactivator of PPAR-gamma-like protein 1 [Mus musculus]	FAM120A	mmR980	GPFPLQVVSVGGPARGRPR; GPFPLQVVSVGGPAR	1.66737
Q61545	RNA-binding protein EWS [Mus musculus]	Ewsr1	dmR614	RGGPGGPPGPLMEQMGGR	1.67218
Q52KG4	zinc finger and BTB domain-containing protein 45 [Mus musculus]	Zbtb45	mmR150	VPNTPAPAPLPPPVPPPLAPAQLR	1.69361
E9Q555	PREDICTED: LOW QUALITY PROTEIN: RING finger protein 213 [Mus musculus]	Rnf213	dmR2856	MNRGIFVSR	1.6942
Q80X82	symplekin [Mus musculus]	Sympk	mmR533	RRPEPIIPVTQPR; RPEPIIPVTQPR	1.70638
P49312	heterogeneous nuclear ribonucleoprotein A1 isoform a [Mus musculus]	Hnrnpa1	dmR206; mmR218; mmR225	SGSGNFGGGRGGGFGGNDNFGRGGNFSGR	1.71099
Q80YR5	scaffold attachment factor B2 [Mus musculus]	Safb2	mmR939	GLAGGPGHGHVAAGRGGMAGQGSFAHGGHSQGYIVPSGR	1.72205
Q8CE72	transmembrane protein ENSP00000382582 homolog [Mus musculus]	No match	mmR2169	TPQLIPPARAGAPGR	1.76075
P58742	aladin [Mus musculus]	Aaas	mmR500	FSPVLGR	1.76632
P58252	elongation factor 2 [Mus musculus]	Eef2	mmR10	VNFTVDQIR	1.76808
Q61545	RNA-binding protein EWS [Mus musculus]	Ewsr1	dmR470	EGRGMPPPLRGGPGGPGGPGGPMGR	1.79473
Q6Y7W8	PERQ amino acid-rich with GYF domain-containing protein 2 isoform a [Mus musculus]	Gigyf2	mmR107; dmR119; mmR121	LTGRGGGGGTVVGAPRGR	1.80045
Q80W00	serine/threonine-protein phosphatase 1 regulatory subunit 10 isoform 2 [Mus musculus]	Ppp1r10	mmR737	SGGGPPNGRGGPGGGGMVGGGGHRPHEGPGGSMGSGHR	1.80647
Q8C2Q3	RNA-binding protein 14 [Mus musculus]	Rbm14	mmR238	ASYVAPLTAQPATYR	1.81351
P06537	glucocorticoid receptor [Mus musculus]	Nr3c1	mmR24	GRGSVMDLYK	1.82327
Q91WJ8	far upstream element-binding protein 1 [Mus musculus]	Fubp1	mmR359	GRGQGNWNMGPPGGLQEFNFIVPTGK	1.82403
Q91WJ8	far upstream element-binding protein 1 [Mus musculus]	Fubp1	mmR355; mmR357	SVQAGNPGGPGPGGRGR	1.83135
Q91V81	RNA-binding protein 42 [Mus musculus]	Rbm42	dmR152; mmR162	APILRPAFVPHVLQR	1.84335
Q569Z6	thyroid hormone receptor-associated protein 3 [Mus musculus]	Thrap3	mmR91; mmR101; mmR108	NRGFYPWGQYNRGGYGNYR	1.8522
Q61545	RNA-binding protein EWS [Mus musculus]	Ewsr1	dmR613	GGFGGGRRGGPGGPPGPLMEQMGGR	1.86041
Q91WJ8	far upstream element-binding protein 1 [Mus musculus]	Fubp1	dmR359	GRGRGQGNWNMGPPGGLQEFNFIVPTGK	1.86487
Q91WJ8	far upstream element-binding protein 1 [Mus musculus]	Fubp1	mmR357; mmR359	GRGRGQGNWNMGPPGGLQEFNFIVPTGK	1.86521
Q91WJ8	far upstream element-binding protein 1 [Mus musculus]	Fubp1	dmR357	GRGRGQGNWNMGPPGGLQEFNFIVPTGK	1.86727
Q80W00	serine/threonine-protein phosphatase 1 regulatory subunit 10 isoform 2 [Mus musculus]	Ppp1r10	mmR752	SGGGPPNGRGGPGGGGMVGGGGHRPHEGPGGSMGSGHR	1.8769
Q60865	caprin-1 isoform a [Mus musculus]	Caprin1	dmR631; mmR638	GPANGFRGGYDGYRPSFSNTPNSGYSQSQFTAPR	1.87954
Q9EPQ8	transcription factor 20 isoform b [Mus musculus]	Tcf20	mmR264	VGQFGQHYQSSASSSSSSSFPSPQR	1.88715
Q61545	RNA-binding protein EWS [Mus musculus]	Ewsr1	mmR463; mmR470	EGRGMPPPLRGGPGGPGGPGGPMGR	1.89543
Q8VIJ6	splicing factor, proline- and glutamine-rich [Mus musculus]	Sfpq	dmR25; mmR32	GGGGGRGGLHDFRSPPPGMGLNQNR	1.91325
A2AGH6	mediator of RNA polymerase II transcription subunit 12 [Mus musculus]	Med12	mmR1901; mmR1912	TSVYRQQQPTVPQGQR	1.92116
Q7TMK9	heterogeneous nuclear ribonucleoprotein Q isoform 2 [Mus musculus]	Syncrip	mmR496	GGYEDPYYGYEDFQVGARGR	1.93077
Q3V2Q8	NEDD4-binding protein 2-like 1 [Mus musculus]	N4bp2l1	mmR24; mmR29	QQQPPPRPPPAR	1.93727
P49312	heterogeneous nuclear ribonucleoprotein A1 isoform a [Mus musculus]	Hnrnpa1	mmR218; dmR225	GGGFGGNDNFGRGGNFSGRGGFGGSR	1.9464
Q6A0A9	constitutive coactivator of PPAR-gamma-like protein 1 [Mus musculus]	FAM120A	mmR884	GRGFAGVCGFGGHYGETVATGPYR	1.94781
Q6PDK2	histone-lysine N-methyltransferase MLL2 [Mus musculus]	Kmt2d	mmR2759	QLVGGSQAFYQR	1.97504
P60824	cold-inducible RNA-binding protein [Mus musculus]	Cirbp	mmR94; dmR101; dmR105	GYRGGSAGGRGFFR	1.97718
Q569Z6	thyroid hormone receptor-associated protein 3 [Mus musculus]	Thrap3	mmR91; dmR101	NRGFYPWGQYNRGGYGNYR	1.98264
O88569	heterogeneous nuclear ribonucleoproteins A2/B1 isoform 1 [Mus musculus]	Hnrnpa2b1	mmR238; mmR266	GGSDGYGSGRGFGDGYNGYGGGPGGGNFGGSPGYGGGR	1.98525
Q60749	KH domain-containing, RNA-binding, signal transduction-associated protein 1 [Mus musculus]	Khdrbs1	mmR304; mmR310	GRGVGPPRGALVR	2.00068
Q5I1X5	relA-associated inhibitor [Mus musculus]	Ppp1r13l	mmR137; mmR142; mmR144	TPIYLQPDTYSSLDRAPSPRPR	2.00188
Q8C3F2	constitutive coactivator of PPAR-gamma-like protein 2 [Mus musculus]	Fam120c	mmR938	SRGFAGLHPIPPQGGK	2.00629
Q8VDM6	heterogeneous nuclear ribonucleoprotein U-like protein 1 isoform 1 [Mus musculus]	Hnrnpul1	mmR664	GGGGGSGGGGGNYRGGFNR	2.02755
Q8K1I7	WAS/WASL-interacting protein family member 1 [Mus musculus]	Wipf1	dmR33	TEQAGRNALLSDISK	2.0415
P56959	RNA-binding protein FUS [Mus musculus]	Fus	mmR387; dmR400	GGPMGRGGYGGGGSGGGGRGGFPSGGGGGGGQQR	2.04537
P63163	small nuclear ribonucleoprotein-associated protein N [Mus musculus]	Snrpn	mmR108	VPLAGAAGGPGVGR	2.0647
Q9Z1Y4	thyroid receptor-interacting protein 6 [Mus musculus]	Trip6	mmR218	GASQASGPLPGPHFPLTGRGEVWGAGYR	2.09809
P49312	heterogeneous nuclear ribonucleoprotein A1 isoform b [Mus musculus]	Hnrnpa1	mmR196; dmR206	GRSGSGNFGGGRGGGFGGNDNFGR	2.1026
Q8K3X4	interferon regulatory factor 2-binding protein-like [Mus musculus]	Irf2bpl	mmR150	SRFEYPPPPVSLGSSSHAAR	2.10602
P49312	heterogeneous nuclear ribonucleoprotein A1 isoform b [Mus musculus]	Hnrnpa1	mmR196; mmR206; mmR218	GRSGSGNFGGGRGGGFGGNDNFGR	2.11185
P98083	SHC-transforming protein 1 isoform a [Mus musculus]	Shc1	mmR100	AAEDGEGSAGAALRDSGLLPLLQDMNKLSGGGGR	2.14649
A2AIV2	protein virilizer homolog [Mus musculus]	Kiaa1429	dmR1772; dmR1774; mmR1792	ASRGRGGLGPSWASTNSGSGGSR	2.14735
Q4VGL6	roquin [Mus musculus]	Rc3h1	mmR597	GSQLYPAQQADVYYQDPR	2.15334
Q9QX47	protein SON [Mus musculus]	Son	mmR945	LGQDPYRLGHDPYR	2.15628
P49312	heterogeneous nuclear ribonucleoprotein A1 isoform a [Mus musculus]	Hnrnpa1	mmR232	GGFGGSRGGGGYGGSGDGYNGFGNDGSNFGGGGSYNDFGNYNNQSSNFGPMK	2.17923
O88569	heterogeneous nuclear ribonucleoproteins A2/B1 isoform 1 [Mus musculus]	Hnrnpa2b1	dmR238	GGGGNFGPGPGSNFRGGSDGYGSGRGFGDGYNGYGGGPGGGNFGGSPGYGGGR; GGSDGYGSGRGFGDGYNGYGGGPGGGNFGGSPGYGGGR	2.19142
Q8C854	myelin expression factor 2 isoform 1 [Mus musculus]	Myef2	dmR494; dmR506	SIDVDRGFLSGPMGSGMR	2.19346
G5E870	thyroid hormone receptor interactor 12 [Mus musculus]	Trip12	mmR428	GLPPHLFGPLGPR	2.19627
E9PZM7	splicing factor, arginine/serine-rich 2, interacting protein [Mus musculus]	Scaf11	mmR1096; mmR1098	NFGPGWMSSRGR	2.2571
Q9QXA5	U6 snRNA-associated Sm-like protein LSm4 [Mus musculus]	Lsm4	dmR100; dmR107; mmR113	GRGMGGAGRGVFGGR	2.26883
Q8VHM5	heterogeneous nuclear ribonucleoprotein R [Mus musculus]	Hnrnpr	mmR525; mmR531	GRAGYSQRGAPLGPPR	2.30993
Q571H0	nucleolar pre-ribosomal-associated protein 1 [Mus musculus]	Urb1	dmR2026; mmR2029; dmR2031	SRPVVAAQARGPRGR	2.31151
O70133	ATP-dependent RNA helicase A [Mus musculus]	Dhx9	mmR1361; dmR1372	RGYGGGYFGQGRGGGGGGGY	2.32659
Q3TKT4	transcription activator BRG1 isoform 2 [Mus musculus]	Smarca4	mmR181	GPTPFNQNQLHQLR	2.32694
P53996	cellular nucleic acid-binding protein isoform 1 [Mus musculus]	Cnbp	mmR32; mmR34	SRGRGGFTSDR	2.32789
Q8BG05	heterogeneous nuclear ribonucleoprotein A3 isoform a [Mus musculus]	Hnrnpa3	mmR216; dmR226; mmR239	GRGGGSGNFMGRGGNFGGGGGNFGR	2.39353
Q8BQ46	TATA-binding protein-associated factor 2N [Mus musculus]	Taf15	mmR183	GYGGSQGGGR	2.41633
Q9WUK2	eukaryotic translation initiation factor 4H [Mus musculus]	Eif4h	mmR166	DDFNSGYRDDFLGGR; DDFNSGYRDDFLGGRGGSRPGDR	2.44597
Q91V81	RNA-binding protein 42 [Mus musculus]	Rbm42	dmR147; dmR152; mmR162	AAVAPQRAPILRPAFVPHVLQR	2.44839
Q8K2F8	protein LSM14 homolog A [Mus musculus]	Lsm14a	mmR403	LNAETFGIPLRPNR	2.52121
Q8VIJ6	splicing factor, proline- and glutamine-rich [Mus musculus]	Sfpq	mmR25; dmR32	GGGGGRGGLHDFRSPPPGMGLNQNR	2.55721
Q8BG05	heterogeneous nuclear ribonucleoprotein A3 isoform a [Mus musculus]	Hnrnpa3	dmR239	GGNFGGGGGNFGRGGNFGGRGGYGGGGGGSR; GGNFGGGGGNFGRGGNFGGR	2.55987
Q8CHY6	transcriptional repressor p66 alpha isoform b [Mus musculus]	Gatad2a	mmR253; mmR268	GAQIHNIRQHSSTGPPPLLLAPR	2.56545
Q8K4P0	WD repeat domain 33 isoform 1 [Mus musculus]	Wdr33	mmR1309	SGSNWGRGSNMNSGPPR	2.5959
Q7TS75	protein Fam123b [Mus musculus]	Amer1	mmR568; dmR579	NSEMLDPFLNLEPFSSRPPGAMETEEER	2.63957
P49312	heterogeneous nuclear ribonucleoprotein A1 isoform b [Mus musculus]	Hnrnpa1	dmR218; mmR225	GGGFGGNDNFGRGGNFSGR	2.64138
P24270	catalase [Mus musculus]	Cat	mmR380	LGPNYLQIPVNCPYRAR; LGPNYLQIPVNCPYR	2.718
Q8R123	FAD synthase [Mus musculus]	Flad1	dmR4; dmR14	MASRASELPPGSGR	2.74548
Q8VHM5	heterogeneous nuclear ribonucleoprotein R [Mus musculus]	Hnrnpr	mmR564	GNRGGNVGGK	2.82292
Q8CCS6	polyadenylate-binding protein 2 [Mus musculus]	Pabpn1	dmR275; dmR283; mmR285	SRFYSGFNSRPR	2.89468
Q8VC31	coiled-coil domain-containing protein 9 isoform 1 [Mus musculus]	Ccdc9	dmR106	THPQQGGRAGVGRASQGWEDGAGEQLR	2.89811
Q8VC31	coiled-coil domain-containing protein 9 isoform 1 [Mus musculus]	Ccdc9	mmR101; mmR106	THPQQGGRAGVGRASQGWEDGAGEQLR	2.89811
Q80VD1	family with sequence similarity 98, member B [Mus musculus]	Fam98b	mmR351	GGGGGGRGGWGGGGGWGGGGGSGGGWGGSGGGGGGR	2.92759
Q9Z2E1	methyl-CpG-binding domain protein 2 [Mus musculus]	Mbd2	dmR94; dmR96	GRGRPQSGGSGLGGDGGGGAGGCGGGSGGGVAPR	2.93593
P53995	anaphase-promoting complex subunit 1 [Mus musculus]	Anapc1	mmR368	AHSPALGVHSFSGAQR	2.99923
Q9CY57	Friend of PRMT1 protein [Mus musculus]	Chtop	mmR135; mmR141	GGMSLRGQNLLR	3.01827
Q60668	heterogeneous nuclear ribonucleoprotein D0 isoform a [Mus musculus]; heterogeneous nuclear ribonucleoprotein D0 isoform c [Mus musculus]	Hnrnpd	dmR278	EQYQQQQQWGSRGGFAGR	3.03347
Q91VM5	heterogeneous nuclear ribonucleoprotein G [Mus musculus]	Rbmxl1	mmR110	GLRGGSGGTR	3.04215
Q00899	transcriptional repressor protein YY1 [Mus musculus]	Yy1	dmR281	QLAEFARMKPRK	3.04442
Q60668	heterogeneous nuclear ribonucleoprotein D0 isoform a [Mus musculus]; heterogeneous nuclear ribonucleoprotein D0 isoform c [Mus musculus]	Hnrnpd	dmR272	EQYQQQQQWGSRGGFAGR	3.05161
P56959	RNA-binding protein FUS [Mus musculus]	Fus	dmR387; dmR400	GGPMGRGGYGGGGSGGGGRGGFPSGGGGGGGQQR	3.07084
Q61545	RNA-binding protein EWS [Mus musculus]	Ewsr1	mmR489; dmR493	MGGRGGDRGGFPPR	3.08115
Q80W00	serine/threonine-protein phosphatase 1 regulatory subunit 10 isoform 2 [Mus musculus]	Ppp1r10	mmR710	GGRGGNEPPPPPPFR	3.1094
Q9WU42	nuclear receptor corepressor 2 [Mus musculus]	Ncor2	mmR1700	ESSLALNYAAGPR	3.12538
Q61545	RNA-binding protein EWS [Mus musculus]	Ewsr1	mmR562	APKPEGFLPPPFPPPGGDRGR; APKPEGFLPPPFPPPGGDR	3.12582
Q8CCS6	polyadenylate-binding protein 2 [Mus musculus]	Pabpn1	dmR275; mmR283; mmR285	SRFYSGFNSRPR	3.15533
Q7TNC4	putative RNA-binding protein Luc7-like 2 isoform 1 [Mus musculus]	Luc7l2	mmR125	AERVHELNEEIGK	3.15609
Q61271	activin receptor type-1B precursor [Mus musculus]	Acvr1b	dmR223; dmR225	FGEVWRGR	3.21739
Q60668	heterogeneous nuclear ribonucleoprotein D0 isoform a [Mus musculus]; heterogeneous nuclear ribonucleoprotein D0 isoform c [Mus musculus]	Hnrnpd	mmR272; mmR278	EQYQQQQQWGSRGGFAGR	3.23014
Q8BG05	heterogeneous nuclear ribonucleoprotein A3 isoform a [Mus musculus]	Hnrnpa3	mmR246; mmR257	GGNFGGRGGYGGGGGGSRGSYGGGDGGYNGFGGDGGNYGGGPGYSSR	3.23017
Q8VIJ6	splicing factor, proline- and glutamine-rich [Mus musculus]	Sfpq	dmR25; dmR32	GGGGGRGGLHDFRSPPPGMGLNQNR	3.30964
Q8VIJ6	splicing factor, proline- and glutamine-rich [Mus musculus]	Sfpq	dmR32	GGGGGRGGLHDFRSPPPGMGLNQNR	3.3302
Q3UC65	hypothetical protein LOC27981 [Mus musculus]	Rsrp1	dmR137; mmR145	SQHRWSYYAITR	3.35373
Q8BTI8	serine/arginine repetitive matrix protein 2 [Mus musculus]	Srrm2	dmR2345	MAPALSGANLTSPRVPLSAYDR	3.35388
O88291	zinc finger protein 326 [Mus musculus]	Znf326	mmR235	GHMGDFGSFHRPGIIVDYQNKPANVTIATAR	3.35643
Q569Z6	thyroid hormone receptor-associated protein 3 [Mus musculus]	Thrap3	dmR101	GFYPWGQYNRGGYGNYR	3.36141
Q8VDM6	heterogeneous nuclear ribonucleoprotein U-like protein 1 isoform 1 [Mus musculus]	Hnrnpul1	dmR639; mmR645	GPPGGNRGGFQNRGGGGGSGGGGGNYR	3.36891
Q60865	caprin-1 isoform a [Mus musculus]	Caprin1	mmR638; mmR658	GGYDGYRPSFSNTPNSGYSQSQFTAPRDYSGYQR	3.37455
Q99MR6	serrate RNA effector molecule homolog isoform 1 [Mus musculus]	Srrt	dmR839; mmR849	GNYDAFRGQGGYPGKPR	3.40269
Q8K019	bcl-2-associated transcription factor 1 isoform 2 [Mus musculus]	Bclaf1	mmR795	DYSGFAGVSRPR	3.55663
Q60865	caprin-1 isoform a [Mus musculus]	Caprin1	dmR617; mmR624	GARGLMNGYRGPANGFR	3.57042
Q61545	RNA-binding protein EWS [Mus musculus]	Ewsr1	mmR574; mmR580	GGRGGLMDRGGPGGMFR	3.61824
Q8VEK3	heterogeneous nuclear ribonucleoprotein U [Mus musculus]	Hnrnpu	dmR709; mmR715	RGNMPQRGGGGGSGGIGYPYPR	3.63942
Q9QXA5	U6 snRNA-associated Sm-like protein LSm4 [Mus musculus]	Lsm4	mmR100; dmR107; mmR113	GRGMGGAGRGVFGGR	3.70505
Q9DC22	DDB1- and CUL4-associated factor 6 [Mus musculus]	Dcaf6	dmR366	WFEEASEVAQSNRGR	3.72852
Q8VEK3	heterogeneous nuclear ribonucleoprotein U [Mus musculus]	Hnrnpu	mmR762	GNYNQNFRGR	3.73476
Q9WUK2	eukaryotic translation initiation factor 4H [Mus musculus]	Eif4h	mmR159	DDFNSGYRDDFLGGR	3.73539
Q8K2F8	protein LSM14 homolog A [Mus musculus]	Lsm14a	dmR400	LNAETFGIPLRPNRGR	3.75056
Q60865	caprin-1 isoform a [Mus musculus]	Caprin1	mmR631; dmR638	GPANGFRGGYDGYRPSFSNTPNSGYSQSQFTAPR	3.77441
Q80VD1	family with sequence similarity 98, member B [Mus musculus]	Fam98b	dmR351	GGWGGGGGGRGGGGGGRGGWGGGGGWGGGGGSGGGWGGSGGGGGGR	3.78366
Q9QXA5	U6 snRNA-associated Sm-like protein LSm4 [Mus musculus]	Lsm4	dmR100; mmR107; mmR113	GRGMGGAGRGVFGGR	3.80677
Q8BG05	heterogeneous nuclear ribonucleoprotein A3 isoform a [Mus musculus]; PREDICTED: heterogeneous nuclear ribonucleoprotein A3-like isoform 16 [Mus musculus]	Hnrnpa3	mmR286	GSYGGGDGGYNGFGGDGGNYGGGPGYSSR	3.81792
Q60749	KH domain-containing, RNA-binding, signal transduction-associated protein 1 [Mus musculus]	Khdrbs1	mmR45	LTPSRPSPLPHRPR	3.83329
P61460	DEP domain-containing protein 5 isoform 1 [Mus musculus]	Depdc5	mmR286	LFIQYPVLVR	3.83467
Q569Z6	thyroid hormone receptor-associated protein 3 [Mus musculus]	Thrap3	dmR827; mmR833	ARGTFQFR	3.84842
Q91XX1	protocadherin gamma subfamily C, 3 [Mus musculus]	Pcdhgc3	dmR254; mmR262	ARVREDAPPGTR	3.8821
O88845	A-kinase anchor protein 10, mitochondrial precursor [Mus musculus]	Akap10	dmR2; dmR9	MRGAGPSPR	3.90323
Q8VIJ6	splicing factor, proline- and glutamine-rich [Mus musculus]	Sfpq	dmR19	RGGGGGRGGLHDFR	3.90437
P35550	rRNA 2'-O-methyltransferase fibrillarin [Mus musculus]	Fbl	dmR31; mmR38	GGRGGFGGGRGGFGGGGR	3.95069
P49312	heterogeneous nuclear ribonucleoprotein A1 isoform b [Mus musculus]	Hnrnpa1	mmR196; dmR206; mmR218	GRSGSGNFGGGRGGGFGGNDNFGR	3.99646
Q9Z1X4	interleukin enhancer-binding factor 3 isoform 1 [Mus musculus]	Ilf3	dmR640	FAAKPHNPGFGMGGPMHNEVPPPPNIRGR	4.02474
Q9D011	TTD non-photosensitive 1 protein homolog [Mus musculus]	Mplkip	dmR116; mmR125	SPAGSQHQFGYSPGQQQTYPQGSPRTSTPFGSGRGR; SPAGSQHQFGYSPGQQQTYPQGSPRTSTPFGSGR	4.04422
Q8CCS6	polyadenylate-binding protein 2 [Mus musculus]	Pabpn1	mmR275; mmR285	SRFYSGFNSRPR	4.07029
Q8CCS6	polyadenylate-binding protein 2 [Mus musculus]	Pabpn1	mmR275; mmR283	SRFYSGFNSRPR	4.07029
Q8VEK3	heterogeneous nuclear ribonucleoprotein U [Mus musculus]	Hnrnpu	mmR715	GNMPQRGGGGGSGGIGYPYPR; RGNMPQRGGGGGSGGIGYPYPR	4.0705
P35550	rRNA 2'-O-methyltransferase fibrillarin [Mus musculus]	Fbl	mmR38	GGFGGGRGGFGGGGR	4.08547
Q8VEK3	heterogeneous nuclear ribonucleoprotein U [Mus musculus]	Hnrnpu	mmR709; dmR715	RGNMPQRGGGGGSGGIGYPYPR	4.1407
Q9D0E1	heterogeneous nuclear ribonucleoprotein M isoform a [Mus musculus]	Hnrnpm	mmR442; mmR448	MGLVMDRMGSVER	4.15711
O88569	heterogeneous nuclear ribonucleoproteins A2/B1 isoform 2 [Mus musculus]; heterogeneous nuclear ribonucleoproteins A2/B1 isoform 1 [Mus musculus]	Hnrnpa2b1	mmR238	GGGGNFGPGPGSNFRGGSDGYGSGR; GGSDGYGSGR; GGSDGYGSGRGFGDGYNGYGGGPGGGNFGGSPGYGGGR	4.15831
Q61545	RNA-binding protein EWS [Mus musculus]	Ewsr1	dmR562; mmR571	APKPEGFLPPPFPPPGGDRGRGGPGGMR	4.19088
Q8C0L8	conserved oligomeric Golgi complex subunit 5 [Mus musculus]	Cog5	mmR283; dmR296	GGPGRAAMPTPGSTAGFR	4.22077
Q8VIJ6	splicing factor, proline- and glutamine-rich [Mus musculus]	Sfpq	mmR32	GGLHDFRSPPPGMGLNQNR	4.31549
Q9CY58	plasminogen activator inhibitor 1 RNA-binding protein isoform 1 [Mus musculus]	Serbp1	dmR366; mmR369	KPANDITSQLEINFGDLGRPGRGGR	4.33868
Q9D011	TTD non-photosensitive 1 protein homolog [Mus musculus]	Mplkip	dmR125; mmR127	SPAGSQHQFGYSPGQQQTYPQGSPRTSTPFGSGRGR	4.3447
A2AEV7	coiled-coil domain containing 120 [Mus musculus]	Ccdc120	mmR407	SSEVLYERPQPVPSFSSR	4.36182
A2AIV2	protein virilizer homolog [Mus musculus]	Kiaa1429	dmR1772; mmR1774	ASRGRGGLGPSWASTNSGSGGSR	4.39565
Q80UY2	E3 ubiquitin-protein ligase KCMF1 [Mus musculus]	Kcmf1	mmR159; mmR165	MFHPGRGLGGPR	4.47549
Q8VIJ6	splicing factor, proline- and glutamine-rich [Mus musculus]	Sfpq	mmR9	SRGGGGGGFHR	4.4787
Q80VD1	family with sequence similarity 98, member B [Mus musculus]	Fam98b	mmR344; dmR351; mmR380	GGWGGGGGGRGGGGGGRGGWGGGGGWGGGGGSGGGWGGSGGGGGGR	4.47916
Q9Z2E1	methyl-CpG-binding domain protein 2 [Mus musculus]	Mbd2	dmR92; dmR94; dmR96	GRGRGRPQSGGSGLGGDGGGGAGGCGGGSGGGVAPR	4.51876
Q8VEK3	heterogeneous nuclear ribonucleoprotein U [Mus musculus]	Hnrnpu	mmR730	GGGGGSGGIGYPYPRGPVFPGR; GGGGGSGGIGYPYPR	4.54056
Q80VD1	family with sequence similarity 98, member B [Mus musculus]	Fam98b	mmR344; mmR351	GGWGGGGGGRGGGGGGRGGWGGGGGWGGGGGSGGGWGGSGGGGGGR	4.54733
P97855	ras GTPase-activating protein-binding protein 1 [Mus musculus]	G3bp1	dmR458	GGMVQKPGFGVGRGITTPR	4.5895
Q61545	RNA-binding protein EWS [Mus musculus]	Ewsr1	mmR454	KPPMNSMRGGMPPR; KKPPMNSMRGGMPPR	4.60177
Q9CY66	H/ACA ribonucleoprotein complex subunit 1 [Mus musculus]	Gar1	mmR8; mmR13	GGGRGGFNR	4.69962
Q3TLH4	protein PRRC2C [Mus musculus]	Prrc2c	mmR1911	QPPPSIRLPSAQTSNGTDFVAAGK	4.71608
Q8VHM5	heterogeneous nuclear ribonucleoprotein R [Mus musculus]	Hnrnpr	dmR525; mmR531	GRAGYSQRGAPLGPPR	4.99358
Q69Z23	dynein heavy chain 17, axonemal [Mus musculus]	Dnah17	mmR3019	RMELVAKIER	5.22699
Q60865	caprin-1 isoform a [Mus musculus]	Caprin1	mmR617; mmR624	GARGLMNGYRGPANGFR	5.2685
Q9D011	TTD non-photosensitive 1 protein homolog [Mus musculus]	Mplkip	mmR116; mmR125; mmR127	SPAGSQHQFGYSPGQQQTYPQGSPRTSTPFGSGRGR	5.31091
Q9R1C7	pre-mRNA-processing factor 40 homolog A [Mus musculus]	Prpf40a	mmR24	GGLMVSEMESQPPSRGPGDGER	5.69303
Q8R2G6	coiled-coil domain-containing protein 80 precursor [Mus musculus]	Ccdc80	mmR36	MMWKMGPHFTTLLAMWLVCGSASHSPALDSDSHTGR	5.70596
P97855	ras GTPase-activating protein-binding protein 1 [Mus musculus]	G3bp1	mmR464	GGMVQKPGFGVGRGITTPR	5.72228
P31001	desmin [Mus musculus]	Des	mmR453	TVMIKTIETR	5.74773
Q80YR5	scaffold attachment factor B2 [Mus musculus]	Safb2	dmR939	GLAGGPGHGHVAAGRGGMAGQGSFAHGGHSQGYIVPSGR	5.81657
Q91YI6	poly(A) RNA polymerase GLD2 [Mus musculus]	Papd4	mmR73	AVSLQPLTYGTVSPIQTSTSPLFR	5.85506
Q8JZP9	GAS2-like protein 1 isoform beta [Mus musculus]	Gas2l1	dmR397; mmR402	RPTAPRSQSR	5.85723
P59729	ras and Rab interactor 3 isoform 1 [Mus musculus]	Rin3	mmR856	QLSVEVQDSIHR	5.95682
Q9Z1Y4	thyroid receptor-interacting protein 6 [Mus musculus]	Trip6	mmR190	RGASQASGPLPGPHFPLTGR	5.96395
P97855	ras GTPase-activating protein-binding protein 1 [Mus musculus]	G3bp1	mmR458	GGMVQKPGFGVGR; GGMVQKPGFGVGRGITTPR	5.9656
A2AIV2	protein virilizer homolog [Mus musculus]	Kiaa1429	mmR1772; dmR1774	ASRGRGGLGPSWASTNSGSGGSR	6.00494
Q8VEK3	heterogeneous nuclear ribonucleoprotein U [Mus musculus]	Hnrnpu	mmR691; mmR696	GGFNMRGGNFRGGAPGNR	6.07613
O35245	polycystin-2 [Mus musculus]	Pkd2	dmR784; mmR805	EREDLDLEHSSLPRPMSSRSFPR	6.10066
Q9D6K5	synaptojanin-2-binding protein [Mus musculus]	Synj2bp	mmR95	NLLHQDAVDLFRNAGCAVSLRVQHR	6.10119
F8VQ05	protein furry homolog-like [Mus musculus]	Fryl	mmR1342	DRELMVTSR	6.1984
Q6Y7W8	PERQ amino acid-rich with GYF domain-containing protein 2 isoform a [Mus musculus]	Gigyf2	mmR107; mmR119	LTGRGGGGGTVVGAPR	6.27926
P49312	heterogeneous nuclear ribonucleoprotein A1 isoform a [Mus musculus]	Hnrnpa1	dmR206	SGSGNFGGGRGGGFGGNDNFGR	6.32149
Q8VHM5	heterogeneous nuclear ribonucleoprotein R [Mus musculus]	Hnrnpr	mmR525; dmR531	GRAGYSQRGAPLGPPR	6.36435
Q569Z6	thyroid hormone receptor-associated protein 3 [Mus musculus]	Thrap3	mmR108	GGYGNYRSNWQNYR; GFYPWGQYNRGGYGNYR	6.36684
O35071	kinesin-like protein KIF1C [Mus musculus]	Kif1c	mmR1022; dmR1026	RPPSPRRPHRSR	6.37569
G5E893	ankyrin repeat domain 12 [Mus musculus]	Ankrd12	dmR987; dmR989	ERARDEPLK	6.43737
Q8VHM5	heterogeneous nuclear ribonucleoprotein R [Mus musculus]	Hnrnpr	mmR499; mmR501	GGYEDPYYGYDDGYAVRGR	6.43785
Q8R1T1	charged multivesicular body protein 7 [Mus musculus]	Chmp7	dmR42	MSFLFSAFKRSR	6.55694
Q61545	RNA-binding protein EWS [Mus musculus]	Ewsr1	mmR614	RGGPGGPPGPLMEQMGGRR; RGGPGGPPGPLMEQMGGR	6.67787
Q569Z6	thyroid hormone receptor-associated protein 3 [Mus musculus]	Thrap3	mmR81; mmR87	GYRRPYYFR	6.67982
Q68FH0	plakophilin-4 isoform 1 [Mus musculus]	Pkp4	mmR253; mmR269	TSLGSGFGSPSVTDSRPLNPSAYSSSTLPAQR	6.6864
Q6ZPY7	lysine-specific demethylase 3B [Mus musculus]	Kdm3b	mmR203	LQEIFSRGPYSVQGHR	6.69138
Q61545	RNA-binding protein EWS [Mus musculus]	Ewsr1	mmR574; dmR580	GGRGGLMDRGGPGGMFR	6.82244
Q8VEK3	heterogeneous nuclear ribonucleoprotein U [Mus musculus]	Hnrnpu	mmR748	GNYNRGGMPNR	6.85004
Q569Z6	thyroid hormone receptor-associated protein 3 [Mus musculus]	Thrap3	dmR91; mmR101	NRGFYPWGQYNR	6.87895
P70333	heterogeneous nuclear ribonucleoprotein H2 [Mus musculus]	Hnrnph2	mmR212; dmR217	LMTMQRPGPYDRPGAGR	6.91741
Q80W00	serine/threonine-protein phosphatase 1 regulatory subunit 10 isoform 2 [Mus musculus]	Ppp1r10	mmR728; mmR737	GGRSGGGPPNGRGGPGGGGMVGGGGHRPHEGPGGSMGSGHR	6.92551
Q60668	heterogeneous nuclear ribonucleoprotein D0 isoform c [Mus musculus]	Hnrnpd	mmR345	RGGHQNSYKPY	7.06056
Q7TMK9	heterogeneous nuclear ribonucleoprotein Q isoform 2 [Mus musculus]	Syncrip	dmR496; mmR498	GGYEDPYYGYEDFQVGARGR	7.06658
O08583	THO complex subunit 4 [Mus musculus]	Alyref	mmR38	AGSQGGRGGAVQAAAR	7.09285
P61979	heterogeneous nuclear ribonucleoprotein K [Mus musculus]	Hnrnpk	dmR296	GPPPPPPGRGGR; RGPPPPPPGRGGR	7.1029
A2AIV2	protein virilizer homolog [Mus musculus]	Kiaa1429	dmR1774; mmR1792	GRGGLGPSWASTNSGSGGSR	7.13022
Q6Y7W8	PERQ amino acid-rich with GYF domain-containing protein 2 isoform a [Mus musculus]	Gigyf2	mmR107	LTGRGGGGGTVVGAPR	7.29103
Q80VD1	family with sequence similarity 98, member B [Mus musculus]	Fam98b	mmR344; dmR351	GGWGGGGGGRGGGGGGRGGWGGGGGWGGGGGSGGGWGGSGGGGGGR	7.37484
P56959	RNA-binding protein FUS [Mus musculus]	Fus	mmR381; mmR387	GRGGPMGRGGYGGGGSGGGGR	7.45515
Q61545	RNA-binding protein EWS [Mus musculus]	Ewsr1	mmR574	GGRGGLMDR	7.52353
Q61545	RNA-binding protein EWS [Mus musculus]	Ewsr1	mmR606	GMDRGGFGGGR	7.56252
Q61545	RNA-binding protein EWS [Mus musculus]	Ewsr1	mmR580	GGLMDRGGPGGMFR	7.60732
Q9CX86	heterogeneous nuclear ribonucleoprotein A0 [Mus musculus]	Hnrnpa0	mmR197; dmR199	GGGRGRGGGGGGGGR	7.62936
O35071	kinesin-like protein KIF1C [Mus musculus]	Kif1c	mmR957	LQGLQGAGGRGGGLR	7.66324
P53996	cellular nucleic acid-binding protein isoform 1 [Mus musculus]	Cnbp	mmR34	GRGGFTSDR	7.67824
Q8VEK3	heterogeneous nuclear ribonucleoprotein U [Mus musculus]	Hnrnpu	mmR715; mmR730	GNMPQRGGGGGSGGIGYPYPR	7.68205
Q8R5I6	glutathione S-transferase mu 4 isoform 1 [Mus musculus]	Gstm4	mmR32; dmR43	RYTMGDAPDYDR	7.71446
Q9QXA5	U6 snRNA-associated Sm-like protein LSm4 [Mus musculus]	Lsm4	mmR100; mmR107	GRGMGGAGRGVFGGR	7.72365
E9Q401	ryanodine receptor 2, cardiac [Mus musculus]	Ryr2	mmR298	WGQPFRLRHVTTGK	7.73934
Q00PI9	heterogeneous nuclear ribonucleoprotein U-like protein 2 [Mus musculus]	Hnrnpul2	mmR682	AYGQQYWGQSGNR; AYGQQYWGQSGNRGGYR	7.79015
P52963	band 4.1-like protein 4A [Mus musculus]	Epb41l4a	mmR533	NQADPNNRRSR	7.80461
Q8VEK3	heterogeneous nuclear ribonucleoprotein U [Mus musculus]	Hnrnpu	mmR754	GGMPNRGNYNQNFR	7.92902
P35550	rRNA 2'-O-methyltransferase fibrillarin [Mus musculus]	Fbl	mmR15	GGGFGGRGGFGDR	8.01883
Q00PI9	heterogeneous nuclear ribonucleoprotein U-like protein 2 [Mus musculus]	Hnrnpul2	mmR686	AYGQQYWGQSGNRGGYR	8.12321
Q8VEK3	heterogeneous nuclear ribonucleoprotein U [Mus musculus]	Hnrnpu	mmR709	RGNMPQRGGGGGSGGIGYPYPR	8.15551
Q6PHQ9	polyadenylate-binding protein 4 isoform 1 [Mus musculus]	Pabpc4	dmR475; mmR483	HLAPTGNAPASRGLPTTAQR	8.18973
Q8K4B0	metastasis-associated protein MTA1 [Mus musculus]	Mta1	dmR604; mmR613; mmR619	LLMPSRGLANHGQTRHMGPSR	8.22182
Q80VD1	family with sequence similarity 98, member B [Mus musculus]	Fam98b	mmR351; mmR380	GGGGGGRGGWGGGGGWGGGGGSGGGWGGSGGGGGGR; GGGGGGRGGWGGGGGWGGGGGSGGGWGGSGGGGGGRGGFQGR	8.2489
Q8VHM5	heterogeneous nuclear ribonucleoprotein R [Mus musculus]	Hnrnpr	mmR499	GGYEDPYYGYDDGYAVRGR	8.25247
Q80UY2	E3 ubiquitin-protein ligase KCMF1 [Mus musculus]	Kcmf1	mmR159	MFHPGRGLGGPR	8.3055
P35550	rRNA 2'-O-methyltransferase fibrillarin [Mus musculus]	Fbl	mmR31; dmR38	GGRGGFGGGRGGFGGGGR	8.35327
Q61545	RNA-binding protein EWS [Mus musculus]	Ewsr1	dmR317; mmR321	GGRGGGRGGLGAGER	8.43114
Q61545	RNA-binding protein EWS [Mus musculus]	Ewsr1	mmR562; mmR564	APKPEGFLPPPFPPPGGDRGR	8.45906
Q7TSC1	protein PRRC2A isoform 1 [Mus musculus]	Prrc2a	dmR1175	RGRGGGRPPPVCSGWSPPAK	8.64821
Q7TSC1	protein PRRC2A isoform 1 [Mus musculus]	Prrc2a	mmR1169; mmR1171	RGRGGGRPPPVCSGWSPPAK	8.64821
Q9CSB4	partitioning defective 3 homolog B [Mus musculus]	Pard3b	mmR1175; dmR1179; mmR1189	VPVYQEMGRAGPRGSSPDQYPYR	8.66301
A2AIV2	protein virilizer homolog [Mus musculus]	Kiaa1429	mmR1625	GRGGFGQGIRPHDIFR	8.73993
Q569Z6	thyroid hormone receptor-associated protein 3 [Mus musculus]	Thrap3	mmR91; mmR101	NRGFYPWGQYNR; NRGFYPWGQYNRGGYGNYR	8.82623
Q8VEK3	heterogeneous nuclear ribonucleoprotein U [Mus musculus]	Hnrnpu	dmR685; dmR691	GRGGFNMRGGNFR	8.87994
P56959	RNA-binding protein FUS [Mus musculus]	Fus	mmR387	GGPMGRGGYGGGGSGGGGR	8.977
O35071	kinesin-like protein KIF1C [Mus musculus]	Kif1c	mmR962	LQGLQGAGGRGGGLR	8.97791
P61979	heterogeneous nuclear ribonucleoprotein K [Mus musculus]	Hnrnpk	mmR296; mmR299	GPPPPPPGRGGR; RGPPPPPPGRGGR	9.03175
P61979	heterogeneous nuclear ribonucleoprotein K [Mus musculus]	Hnrnpk	dmR299	GPPPPPPGRGGR; RGPPPPPPGRGGR	9.2405
Q569Z6	thyroid hormone receptor-associated protein 3 [Mus musculus]	Thrap3	mmR91; mmR108	NRGFYPWGQYNRGGYGNYR	9.25069
Q61545	RNA-binding protein EWS [Mus musculus]	Ewsr1	mmR564	APKPEGFLPPPFPPPGGDRGR; GRGGPGGMR	9.49644
Q61464	zinc finger protein 638 isoform 1 [Mus musculus]	Znf638	dmR54; mmR68	GIPHRFPGHGSYQNMGPQR	9.50206
P35550	rRNA 2'-O-methyltransferase fibrillarin [Mus musculus]	Fbl	dmR8; mmR15	MKPGFSPRGGGFGGR; MKPGFSPRGGGFGGRGGFGDR	9.5036
Q68FH0	plakophilin-4 isoform 1 [Mus musculus]	Pkp4	mmR269	TSLGSGFGSPSVTDSRPLNPSAYSSSTLPAQR	9.50367
Q9R226	KH domain-containing, RNA-binding, signal transduction-associated protein 3 [Mus musculus]	Khdrbs3	mmR206	GRGGVTARPVAVGVPR	9.53962
Q9Z1X4	interleukin enhancer-binding factor 3 isoform 1 [Mus musculus]	Ilf3	mmR640	FAAKPHNPGFGMGGPMHNEVPPPPNIR; FAAKPHNPGFGMGGPMHNEVPPPPNIRGR	9.58614
Q60749	KH domain-containing, RNA-binding, signal transduction-associated protein 1 [Mus musculus]	Khdrbs1	dmR291; mmR302	GRGAAPPPPPVPR	9.61289
Q8BG05	heterogeneous nuclear ribonucleoprotein A3 isoform a [Mus musculus]	Hnrnpa3	dmR246; mmR257; mmR286	GGNFGGRGGYGGGGGGSRGSYGGGDGGYNGFGGDGGNYGGGPGYSSR	9.62305
Q569Z6	thyroid hormone receptor-associated protein 3 [Mus musculus]	Thrap3	mmR81	GYRRPYYFR	9.63791
Q9QXA5	U6 snRNA-associated Sm-like protein LSm4 [Mus musculus]	Lsm4	mmR107; mmR113	GMGGAGRGVFGGR	9.73487
Q61545	RNA-binding protein EWS [Mus musculus]	Ewsr1	dmR564	APKPEGFLPPPFPPPGGDRGR	9.73821
P35550	rRNA 2'-O-methyltransferase fibrillarin [Mus musculus]	Fbl	mmR31; mmR38	GGRGGFGGGRGGFGGGGR; GGRGGFGGGR	9.76115
P09405	nucleolin [Mus musculus]	Ncl	mmR657; mmR663	GGGRGGFGGR; GGGRGGFGGRGGGR	9.76585
Q99LB2	dehydrogenase/reductase SDR family member 4 isoform 1 [Mus musculus]	Dhrs4	dmR230	FSSVLWEEKAR	9.76664
O88935	synapsin-1 isoform a [Mus musculus]	Syn1	mmR108	QTTAAAAATFSEQVGGGSGGAGR	9.94137
Q6A0A9	constitutive coactivator of PPAR-gamma-like protein 1 [Mus musculus]	FAM120A	dmR962; mmR965; mmR980	GRGGRGPFPLQVVSVGGPAR	9.98344
Q8BGV7	BTB/POZ domain-containing adapter for CUL3-mediated RhoA degradation protein 1 [Mus musculus]	Kctd13	dmR294	GPDLALLEATGGAAGGGGAGRGDDEENREHR	10.066
P33215	protein NEDD1 [Mus musculus]	Nedd1	dmR485	RAYLGKQEPK	10.0982
Q7TSC1	protein PRRC2A isoform 1 [Mus musculus]	Prrc2a	mmR1024; mmR1026	GRGRGEYFAR	10.1427
Q8VEK3	heterogeneous nuclear ribonucleoprotein U [Mus musculus]	Hnrnpu	mmR737; mmR743	GPVFPGRGGYSNR	10.1971
P56959	RNA-binding protein FUS [Mus musculus]	Fus	mmR235	SSGGYEPR	10.2168
Q8K019	bcl-2-associated transcription factor 1 isoform 2 [Mus musculus]	Bclaf1	mmR808	ARGVFAGTNTGPNNSNTTFQK	10.2622
E9Q3P4	centromere protein F [Mus musculus]	Cenpf	mmR2897	TSPRFATQKLVGSSPSLGK	10.2728
Q7TMK9	heterogeneous nuclear ribonucleoprotein Q isoform 2 [Mus musculus]	Syncrip	mmR539	GARGGAQQQR	10.3802
P49312	heterogeneous nuclear ribonucleoprotein A1 isoform a [Mus musculus]	Hnrnpa1	mmR206; mmR218; mmR225	SGSGNFGGGRGGGFGGNDNFGRGGNFSGR	10.6314
P56959	RNA-binding protein FUS [Mus musculus]	Fus	mmR468; mmR473; mmR477	GRGGYDRGGYR	10.6568
A2AIV2	protein virilizer homolog [Mus musculus]	Kiaa1429	mmR1774; mmR1792	GRGGLGPSWASTNSGSGGSR; GRGGLGPSWASTNSGSGGSRGK	10.7223
P49312	heterogeneous nuclear ribonucleoprotein A1 isoform b [Mus musculus]; heterogeneous nuclear ribonucleoprotein A1 isoform a [Mus musculus]	Hnrnpa1	mmR206; mmR218	SGSGNFGGGRGGGFGGNDNFGR; SGSGNFGGGRGGGFGGNDNFGRGGNFSGR	10.7587
Q640M1	U3 small nucleolar RNA-associated protein 14 homolog A [Mus musculus]	Utp14a	mmR320	AIMAKYDLEAR	10.9474
Q8BG05	heterogeneous nuclear ribonucleoprotein A3 isoform a [Mus musculus]	Hnrnpa3	mmR257	GGYGGGGGGSRGSYGGGDGGYNGFGGDGGNYGGGPGYSSR	11.0549
Q61545	RNA-binding protein EWS [Mus musculus]	Ewsr1	dmR562	APKPEGFLPPPFPPPGGDRGR	11.0741
Q3TJZ6	hypothetical protein LOC72722 [Mus musculus]	Fam98a	mmR480	GSQGGGWGGRGSQTYHQGGQFEQHFQHGGYQYSHSGFGQGR	11.2505
Q8BG05	heterogeneous nuclear ribonucleoprotein A3 isoform a [Mus musculus]	Hnrnpa3	mmR246; dmR257	GGNFGGRGGYGGGGGGSRGSYGGGDGGYNGFGGDGGNYGGGPGYSSR	11.2748
Q8VHM5	heterogeneous nuclear ribonucleoprotein R [Mus musculus]	Hnrnpr	mmR501	GGYEDPYYGYDDGYAVRGR	11.2968
E9PVA8	GCN1 general control of amino-acid synthesis 1-like 1 [Mus musculus]	Gcn1	mmR2499	HGRSLALSVAVNVAPSR	11.3056
O70133	ATP-dependent RNA helicase A [Mus musculus]	Dhx9	mmR1323	GNYGGGGGGYRGGSQGGYR	11.5526
Q8BG05	heterogeneous nuclear ribonucleoprotein A3 isoform a [Mus musculus]	Hnrnpa3	dmR226; mmR239	GGGSGNFMGRGGNFGGGGGNFGR	11.587
Q9R1C6	diacylglycerol kinase epsilon [Mus musculus]	Dgke	dmR103	RFPCKEIMLK	11.664
Q9CY58	plasminogen activator inhibitor 1 RNA-binding protein isoform 1 [Mus musculus]	Serbp1	dmR177; mmR181	GRGMGRGDGFDSR	11.7783
P56959	RNA-binding protein FUS [Mus musculus]	Fus	dmR387; mmR400	GGPMGRGGYGGGGSGGGGRGGFPSGGGGGGGQQR	11.8364
Q80U35	rho guanine nucleotide exchange factor 17 [Mus musculus]	Arhgef17	mmR382	VSFPAYLASPAGSRGSSR	11.8904
Q8BG05	heterogeneous nuclear ribonucleoprotein A3 isoform a [Mus musculus]	Hnrnpa3	dmR226; dmR239; mmR246	GGGSGNFMGRGGNFGGGGGNFGRGGNFGGR	11.9243
Q8VEK3	heterogeneous nuclear ribonucleoprotein U [Mus musculus]	Hnrnpu	dmR715	GNMPQRGGGGGSGGIGYPYPR; RGNMPQRGGGGGSGGIGYPYPR	11.9664
Q80W00	serine/threonine-protein phosphatase 1 regulatory subunit 10 isoform 2 [Mus musculus]	Ppp1r10	mmR707; mmR710	GRGGRGGNEPPPPPPFR	11.9817
P49312	heterogeneous nuclear ribonucleoprotein A1 isoform a [Mus musculus]	Hnrnpa1	dmR194	QEMASASSSQRGR	12.1453
Q8VEK3	heterogeneous nuclear ribonucleoprotein U [Mus musculus]	Hnrnpu	dmR709	RGNMPQRGGGGGSGGIGYPYPR	12.4267
P60824	cold-inducible RNA-binding protein [Mus musculus]	Cirbp	mmR94; dmR101	GYRGGSAGGRGFFR	12.6386
P56959	RNA-binding protein FUS [Mus musculus]	Fus	mmR381; dmR387	GRGGPMGRGGYGGGGSGGGGR	12.6859
Q9CY57	Friend of PRMT1 protein [Mus musculus]	Chtop	mmR129	TLLRGGMSLR	12.708
O89086	putative RNA-binding protein 3 isoform 1 [Mus musculus]; putative RNA-binding protein 3 isoform 2 [Mus musculus]	Rbm3	mmR103	SYSRGGGDQGYGSGR	12.7266
Q80W00	serine/threonine-protein phosphatase 1 regulatory subunit 10 isoform 2 [Mus musculus]	Ppp1r10	dmR707	GRGGRGGNEPPPPPPFR	12.804
Q80W00	serine/threonine-protein phosphatase 1 regulatory subunit 10 isoform 2 [Mus musculus]	Ppp1r10	dmR710	GRGGRGGNEPPPPPPFR	12.804
Q9QXA5	U6 snRNA-associated Sm-like protein LSm4 [Mus musculus]	Lsm4	dmR113; mmR115; mmR123	GVFGGRGRGGIPGAGR	12.8097
Q91YI4	beta-arrestin-2 [Mus musculus]	Arrb2	mmR196	HFLMSDRR	13.1278
P60824	cold-inducible RNA-binding protein [Mus musculus]	Cirbp	mmR101	GGSAGGRGFFR	13.2957
D3YYU8	obscurin-like 1 [Mus musculus]	Obsl1	mmR769	VEESESLIVKTEGR	13.3119
Q9CY57	Friend of PRMT1 protein [Mus musculus]	Chtop	mmR104	GAIGGRGLPIIQR	13.3768
Q8VIJ6	splicing factor, proline- and glutamine-rich [Mus musculus]	Sfpq	dmR19; mmR25	RGGGGGRGGLHDFR	13.4314
D3YXK2	scaffold attachment factor B [Mus musculus]	Safb	mmR896; mmR906	GGMSGRGSFAPGGASRGHVIPR	13.5747
Q80VD1	family with sequence similarity 98, member B [Mus musculus]	Fam98b	dmR404; mmR410	GGYGGRGGYGGRGYGDPYGGGGGGGGGYR	13.5895
Q9Z130	heterogeneous nuclear ribonucleoprotein D-like [Mus musculus]	Hnrnpdl	mmR289	ASRGGGNHQNNYQPY	13.7422
P09405	nucleolin [Mus musculus]	Ncl	mmR676; dmR678	GGFGGRGRGGFGGR	13.829
P09405	nucleolin [Mus musculus]	Ncl	mmR676; mmR678; mmR684	GGFGGRGRGGFGGR	13.829
Q9Z130	heterogeneous nuclear ribonucleoprotein D-like [Mus musculus]	Hnrnpdl	mmR217	GAAAGGRGGAR	13.9112
O70133	ATP-dependent RNA helicase A [Mus musculus]	Dhx9	mmR1361; mmR1372	RGYGGGYFGQGRGGGGGGGY	14.5176
Q80X50	ubiquitin-associated protein 2-like isoform 1 [Mus musculus]	Ubap2l	mmR168	SGGPSGRGTDR	14.5432
E9PZM7	splicing factor, arginine/serine-rich 2, interacting protein [Mus musculus]	Scaf11	mmR1096	NFGPGWMSSR	14.6883
Q7TSC1	protein PRRC2C [Mus musculus]	Prrc2a	mmR55	RMPPPANLPSLK	14.7153
P09405	nucleolin [Mus musculus]	Ncl	mmR653	GEGGFGGRGGGR; GEGGFGGR; GGFGGRGGGR	14.8645
P09405	nucleolin [Mus musculus]	Ncl	mmR691	GGRGGGGDFKPQGK	15.2214
P61979	heterogeneous nuclear ribonucleoprotein K [Mus musculus]	Hnrnpk	mmR296; dmR299	GPPPPPPGRGGRGGSR	15.4428
Q6NXH3	vasculin isoform 2 [Mus musculus]	Gpbp1	mmR46; dmR59	RHNSSDGFDSGIGRPNGGNFGR	15.5225
Q9Z1X4	interleukin enhancer-binding factor 3 isoform 1 [Mus musculus]	Ilf3	mmR640; mmR642	FAAKPHNPGFGMGGPMHNEVPPPPNIRGR	15.794
Q8R123	FAD synthase [Mus musculus]	Flad1	dmR14	MASRASELPPGSGR	15.8074
D3YXK2	scaffold attachment factor B [Mus musculus]	Safb	mmR906; mmR912	GSFAPGGASRGHVIPR	15.8338
Q9QXA5	U6 snRNA-associated Sm-like protein LSm4 [Mus musculus]	Lsm4	mmR100; mmR107; mmR113	GRGMGGAGRGVFGGR	16.1457
Q8VIJ6	splicing factor, proline- and glutamine-rich [Mus musculus]	Sfpq	mmR25	GGGGGRGGLHDFR	16.2188
P49312	heterogeneous nuclear ribonucleoprotein A1 isoform b [Mus musculus]; heterogeneous nuclear ribonucleoprotein A1 isoform a [Mus musculus]	Hnrnpa1	mmR206	GRSGSGNFGGGRGGGFGGNDNFGR; SGSGNFGGGR; SGSGNFGGGRGGGFGGNDNFGR	16.6235
Q6A0A9	constitutive coactivator of PPAR-gamma-like protein 1 [Mus musculus]	FAM120A	dmR962; mmR965	GRGGRGPFPLQVVSVGGPAR	16.6418
Q6A0A9	constitutive coactivator of PPAR-gamma-like protein 1 [Mus musculus]	FAM120A	dmR965; mmR980	GRGGRGPFPLQVVSVGGPAR	16.6418
Q569Z6	thyroid hormone receptor-associated protein 3 [Mus musculus]	Thrap3	mmR101	GFYPWGQYNRGGYGNYR; GFYPWGQYNR	16.6628
Q9DC29	ATP-binding cassette sub-family B member 6, mitochondrial [Mus musculus]	Abcb6	mmR133	SQARQSLAMGVWMK	16.9127
Q7TMK9	heterogeneous nuclear ribonucleoprotein Q isoform 2 [Mus musculus]	Syncrip	mmR496; mmR498	GGYEDPYYGYEDFQVGARGR	16.9396
P09405	nucleolin [Mus musculus]	Ncl	mmR657	GEGGFGGRGGGR; GGGRGGFGGR; GRGGFGGR	16.9536
P61979	heterogeneous nuclear ribonucleoprotein K [Mus musculus]	Hnrnpk	mmR296	GPPPPPPGRGGR; RGPPPPPPGRGGR	16.9616
P60824	cold-inducible RNA-binding protein [Mus musculus]	Cirbp	mmR94; mmR105	GYRGGSAGGRGFFR	17.3904
O35071	kinesin-like protein KIF1C [Mus musculus]	Kif1c	mmR947; mmR957	QEQLRLQGLQGAGGRGGGLR	17.4117
Q61545	RNA-binding protein EWS [Mus musculus]	Ewsr1	mmR588	GGPGGMFRGGR	17.4499
Q60749	KH domain-containing, RNA-binding, signal transduction-associated protein 1 [Mus musculus]	Khdrbs1	mmR291; mmR302	GRGAAPPPPPVPR	17.5262
Q8K019	bcl-2-associated transcription factor 1 isoform 2 [Mus musculus]	Bclaf1	mmR793; mmR795	DYSGFAGVSRPR	17.906
Q6A0A9	constitutive coactivator of PPAR-gamma-like protein 1 [Mus musculus]	FAM120A	dmR962	GRGGRGPFPLQVVSVGGPAR	17.9709
Q7TSC1	protein PRRC2A isoform 1 [Mus musculus]	Prrc2a	mmR1175	GRGGGRPPPVCSGWSPPAK; RGRGGGRPPPVCSGWSPPAK	18.0009
Q8R326	paraspeckle component 1 [Mus musculus]	Pspc1	dmR507; mmR520	TGSETPQAPMSGVGPVSGGPGGFGRGSQGGNFEGPNKR	18.0753
Q9CX86	heterogeneous nuclear ribonucleoprotein A0 [Mus musculus]	Hnrnpa0	dmR197; mmR199	GGGRGRGGGGGGGGR	18.228
Q8BG05	heterogeneous nuclear ribonucleoprotein A3 isoform a [Mus musculus]	Hnrnpa3	mmR246; dmR257; mmR286	GGNFGGRGGYGGGGGGSRGSYGGGDGGYNGFGGDGGNYGGGPGYSSR	18.4597
Q8K4P0	WD repeat domain 33 isoform 1 [Mus musculus]	Wdr33	mmR1299	SSSLDGDHHDGYHRDEPFGGPPGSSSSSR	18.7364
P49312	heterogeneous nuclear ribonucleoprotein A1 isoform b [Mus musculus]; heterogeneous nuclear ribonucleoprotein A1 isoform a [Mus musculus]	Hnrnpa1	mmR206; mmR225	SGSGNFGGGRGGGFGGNDNFGRGGNFSGR	18.8246
Q8BVL3	sorting nexin-17 [Mus musculus]	Snx17	dmR442	LSAVSLR	18.8367
P49312	heterogeneous nuclear ribonucleoprotein A1 isoform b [Mus musculus]; heterogeneous nuclear ribonucleoprotein A1 isoform a [Mus musculus]	Hnrnpa1	mmR196; mmR206	GRSGSGNFGGGRGGGFGGNDNFGR	18.9173
Q8K2B3	succinate dehydrogenase [ubiquinone] flavoprotein subunit, mitochondrial precursor [Mus musculus]	Sdha	dmR507	LRFADGSIR	19.0191
Q3UHZ5	leiomodin-2 [Mus musculus]	Lmod2	mmR516; dmR522	MEDSSRPSTPQR	19.2196
P61979	heterogeneous nuclear ribonucleoprotein K [Mus musculus]	Hnrnpk	mmR299	RGPPPPPPGRGGR	19.2636
P09405	nucleolin [Mus musculus]	Ncl	dmR678; mmR684	GRGGFGGRGGFR	19.4722
Q60823	RAC-beta serine/threonine-protein kinase [Mus musculus]	Akt2	dmR15	NEVSVIKEGWLHKR	19.8599
Q3TJZ6	hypothetical protein LOC72722 [Mus musculus]	Fam98a	mmR374	GSYDHGGRGGGR	19.9116
Q80VD1	family with sequence similarity 98, member B [Mus musculus]	Fam98b	mmR404; dmR410	GGYGGRGGYGGRGYGDPYGGGGGGGGGYR	20.1549
Q9CY58	plasminogen activator inhibitor 1 RNA-binding protein isoform 1 [Mus musculus]	Serbp1	dmR363	KPANDITSQLEINFGDLGRPGRGGR	20.5199
Q6R891	neurabin-2 [Mus musculus]	Ppp1r9b	mmR14	TEPRGPGGPLRSASPHR	20.7451
P09405	nucleolin [Mus musculus]	Ncl	dmR667; mmR670	GGGRGGRGGFGGR	20.9017
Q8VEK3	heterogeneous nuclear ribonucleoprotein U [Mus musculus]	Hnrnpu	mmR737	GPVFPGRGGYSNR	21.5198
Q8BG05	heterogeneous nuclear ribonucleoprotein A3 isoform a [Mus musculus]; heterogeneous nuclear ribonucleoprotein A3 isoform c [Mus musculus]	Hnrnpa3	dmR239; mmR246	GGNFGGGGGNFGRGGNFGGRGGYGGGGGGSR; GGNFGGGGGNFGRGGNFGGR	21.6308
Q9Z1X4	interleukin enhancer-binding factor 3 isoform 1 [Mus musculus]	Ilf3	dmR642	FAAKPHNPGFGMGGPMHNEVPPPPNIRGR	22.0925
Q9CY58	plasminogen activator inhibitor 1 RNA-binding protein isoform 1 [Mus musculus]	Serbp1	mmR366; mmR369	KPANDITSQLEINFGDLGRPGRGGR	22.6816
Q9CY58	plasminogen activator inhibitor 1 RNA-binding protein isoform 1 [Mus musculus]	Serbp1	dmR369	KPANDITSQLEINFGDLGRPGRGGR	22.6816
P57716	nicastrin precursor [Mus musculus]	Ncstn	mmR5; mmR15	MATTRGGSGPDPGSR	22.7022
P35550	rRNA 2'-O-methyltransferase fibrillarin [Mus musculus]	Fbl	mmR15; mmR21	KPGFSPRGGGFGGRGGFGDR	22.7079
Q8K019	bcl-2-associated transcription factor 1 isoform 2 [Mus musculus]	Bclaf1	mmR94	YHRGGYRPVWNR	23.4006
Q8BG05	heterogeneous nuclear ribonucleoprotein A3 isoform a [Mus musculus]; heterogeneous nuclear ribonucleoprotein A3 isoform c [Mus musculus]	Hnrnpa3	dmR216	GRGGGSGNFMGRGGNFGGGGGNFGR	23.7137
D3YXK2	scaffold attachment factor B [Mus musculus]	Safb	mmR906	GSFAPGGASRGHVIPR	23.794
Q7TSC1	protein PRRC2A isoform 1 [Mus musculus]	Prrc2a	mmR1171	GRGGGRPPPVCSGWSPPAK	24.0722
Q9Z130	heterogeneous nuclear ribonucleoprotein D-like [Mus musculus]	Hnrnpdl	mmR213	GAAAGGRGGAR	24.3748
Q9CX86	heterogeneous nuclear ribonucleoprotein A0 [Mus musculus]	Hnrnpa0	mmR293	SNSGPYRGGYGGGYGGGSF	24.4072
P09405	nucleolin [Mus musculus]	Ncl	mmR684	GGFGGRGGFR	24.8883
Q80VD1	family with sequence similarity 98, member B [Mus musculus]	Fam98b	mmR404; mmR410	GGYGGRGGYGGRGYGDPYGGGGGGGGGYR	24.9072
Q569Z6	thyroid hormone receptor-associated protein 3 [Mus musculus]	Thrap3	mmR837; dmR841	GRGWGRGNYSGNNNNNSNNDFQK	24.9798
Q80VD1	family with sequence similarity 98, member B [Mus musculus]	Fam98b	mmR386	GGWGGGGGWGGGGGSGGGWGGSGGGGGGRGGFQGR	25.118
P61979	heterogeneous nuclear ribonucleoprotein K [Mus musculus]	Hnrnpk	mmR256	GRPVGFPMR; GRPVGFPMRGR	25.8438
Q9CY58	plasminogen activator inhibitor 1 RNA-binding protein isoform 1 [Mus musculus]	Serbp1	dmR177	GRGMGRGDGFDSR	26.5432
Q80VD1	family with sequence similarity 98, member B [Mus musculus]	Fam98b	mmR351; dmR386	GGGGGGRGGWGGGGGWGGGGGSGGGWGGSGGGGGGRGGFQGR	26.6794
Q8VEK3	heterogeneous nuclear ribonucleoprotein U [Mus musculus]	Hnrnpu	mmR691	GGFNMRGGNFR	26.7119
Q8VEK3	heterogeneous nuclear ribonucleoprotein U [Mus musculus]	Hnrnpu	dmR737; mmR743	GPVFPGRGGYSNR	26.7279
Q8VEK3	heterogeneous nuclear ribonucleoprotein U [Mus musculus]	Hnrnpu	mmR703	GGAPGNRGGYNR	26.8883
Q9CY58	plasminogen activator inhibitor 1 RNA-binding protein isoform 1 [Mus musculus]	Serbp1	dmR363; mmR366	KPANDITSQLEINFGDLGRPGRGGRGGR	27.0447
Q8K019	bcl-2-associated transcription factor 1 isoform 2 [Mus musculus]	Bclaf1	mmR90	YHRGGYRPVWNR	27.1995
Q8BG05	heterogeneous nuclear ribonucleoprotein A3 isoform a [Mus musculus]	Hnrnpa3	dmR246	GGNFGGGGGNFGRGGNFGGRGGYGGGGGGSR; GGNFGGGGGNFGRGGNFGGR; GGNFGGRGGYGGGGGGSRGSYGGGDGGYNGFGGDGGNYGGGPGYSSR	27.2414
Q8BG05	heterogeneous nuclear ribonucleoprotein A3 isoform a [Mus musculus]	Hnrnpa3	mmR239; dmR246; mmR257	GGNFGGGGGNFGRGGNFGGRGGYGGGGGGSR	27.3609
Q3TJZ6	hypothetical protein LOC72722 [Mus musculus]	Fam98a	mmR336	QDGPQQQAGGRGGGR; RQDGPQQQAGGRGGGR	27.8058
A2AIV2	protein virilizer homolog [Mus musculus]	Kiaa1429	mmR1623; mmR1625; mmR1633	GRGRGGFGQGIRPHDIFR	28.4201
P53996	cellular nucleic acid-binding protein isoform 1 [Mus musculus]	Cnbp	mmR32; dmR34	SRGRGGFTSDR	28.4316
Q569Z6	thyroid hormone receptor-associated protein 3 [Mus musculus]	Thrap3	mmR841	GWGRGNYSGNNNNNSNNDFQK	28.6192
O70133	ATP-dependent RNA helicase A [Mus musculus]	Dhx9	mmR1353	GSGGGYRGSGGFQR	28.7353
Q8BG05	heterogeneous nuclear ribonucleoprotein A3 isoform a [Mus musculus]	Hnrnpa3	mmR226; dmR239	GGGSGNFMGRGGNFGGGGGNFGRGGNFGGR	28.8304
P49312	heterogeneous nuclear ribonucleoprotein A1 isoform b [Mus musculus]; heterogeneous nuclear ribonucleoprotein A1 isoform a [Mus musculus]	Hnrnpa1	mmR225	GGGFGGNDNFGRGGNFSGR; GGNFSGRGGFGGSR	29.0719
Q8VEK3	heterogeneous nuclear ribonucleoprotein U [Mus musculus]	Hnrnpu	mmR685; mmR691	GRGGFNMRGGNFR	29.2365
Q8VEK3	heterogeneous nuclear ribonucleoprotein U [Mus musculus]	Hnrnpu	mmR685; dmR691	GRGGFNMRGGNFR	29.2876
Q61545	RNA-binding protein EWS [Mus musculus]	Ewsr1	mmR309	GGFDRGGMSR	29.5157
Q8BG05	heterogeneous nuclear ribonucleoprotein A3 isoform a [Mus musculus]	Hnrnpa3	mmR226; mmR239	GGGSGNFMGRGGNFGGGGGNFGRGGNFGGR; GGGSGNFMGRGGNFGGGGGNFGR	29.8156
A2AIV2	protein virilizer homolog [Mus musculus]	Kiaa1429	dmR1623; mmR1625	GRGRGGFGQGIRPHDIFR	30.1043
Q8BQ46	TATA-binding protein-associated factor 2N [Mus musculus]	Taf15	mmR395; mmR401	GRGYGGER	30.2819
Q6A0A9	constitutive coactivator of PPAR-gamma-like protein 1 [Mus musculus]	FAM120A	mmR962; mmR965	GRGGRGPFPLQVVSVGGPAR	30.3835
Q8VEK3	heterogeneous nuclear ribonucleoprotein U [Mus musculus]	Hnrnpu	mmR709; mmR715	RGNMPQRGGGGGSGGIGYPYPR	30.5668
Q9CY66	H/ACA ribonucleoprotein complex subunit 1 [Mus musculus]	Gar1	mmR211	GGRGGGGGFR	30.8186
Q6TXD4	dynamin-binding protein [Mus musculus]	Dnmbp	mmR981	KDLVLKYR	30.9652
Q569Z6	thyroid hormone receptor-associated protein 3 [Mus musculus]	Thrap3	mmR91	NRGFYPWGQYNR	31.7134
Q80VD1	family with sequence similarity 98, member B [Mus musculus]	Fam98b	mmR410	GGYGGRGYGDPYGGGGGGGGGYR	32.2902
Q8VHM5	heterogeneous nuclear ribonucleoprotein R [Mus musculus]	Hnrnpr	dmR499; mmR501	GGYEDPYYGYDDGYAVRGR	32.3082
Q8BG05	heterogeneous nuclear ribonucleoprotein A3 isoform a [Mus musculus]	Hnrnpa3	mmR226	GGGSGNFMGRGGNFGGGGGNFGR	33.5913
Q569Z6	thyroid hormone receptor-associated protein 3 [Mus musculus]	Thrap3	dmR837	GRGWGRGNYSGNNNNNSNNDFQK	33.7656
Q61545	RNA-binding protein EWS [Mus musculus]	Ewsr1	mmR304	GRGGFDR	34.3875
P09405	nucleolin [Mus musculus]	Ncl	mmR678; mmR684	GRGGFGGRGGFR	34.6339
Q569Z6	thyroid hormone receptor-associated protein 3 [Mus musculus]	Thrap3	dmR837; dmR841	GRGWGRGNYSGNNNNNSNNDFQK	34.6862
Q99M28	RNA-binding protein with serine-rich domain 1 isoform 1 [Mus musculus]	Rnps1	mmR265	MLPPPPMWRRSPPR	34.9712
Q8BG05	heterogeneous nuclear ribonucleoprotein A3 isoform a [Mus musculus]; PREDICTED: heterogeneous nuclear ribonucleoprotein A3-like isoform 16 [Mus musculus]	Hnrnpa3	mmR216	GRGGGSGNFMGR	35.7373
Q80VD1	family with sequence similarity 98, member B [Mus musculus]	Fam98b	dmR404	GGYGGRGGYGGRGYGDPYGGGGGGGGGYR	35.8394
P09405	nucleolin [Mus musculus]	Ncl	mmR678; mmR688	GRGGFGGRGGFR	36.9317
A2AIV2	protein virilizer homolog [Mus musculus]	Kiaa1429	mmR1623; mmR1625	GRGRGGFGQGIRPHDIFR	38.0714
A2AIV2	protein virilizer homolog [Mus musculus]	Kiaa1429	mmR1623; mmR1633	GRGRGGFGQGIRPHDIFR	38.0714
Q8BQ46	TATA-binding protein-associated factor 2N [Mus musculus]	Taf15	mmR413	GGDRGGYGGDR	38.0776
P49312	heterogeneous nuclear ribonucleoprotein A1 isoform b [Mus musculus]; heterogeneous nuclear ribonucleoprotein A1 isoform a [Mus musculus]	Hnrnpa1	mmR218; mmR225	GGGFGGNDNFGRGGNFSGR	38.3298
Q6A0A9	constitutive coactivator of PPAR-gamma-like protein 1 [Mus musculus]	FAM120A	dmR965	GRGGRGPFPLQVVSVGGPAR	39.8502
P49312	heterogeneous nuclear ribonucleoprotein A1 isoform b [Mus musculus]; heterogeneous nuclear ribonucleoprotein A1 isoform a [Mus musculus]	Hnrnpa1	dmR218	GGGFGGNDNFGRGGNFSGR	40.1663
Q61687	transcriptional regulator ATRX [Mus musculus]	Atrx	mmR931	HLRSRQSR	40.836
P56959	RNA-binding protein FUS [Mus musculus]	Fus	mmR473	GGYDRGGYR	41.9904
P61979	heterogeneous nuclear ribonucleoprotein K [Mus musculus]	Hnrnpk	mmR258	GRPVGFPMRGR	42.2862
Q8VDM6	heterogeneous nuclear ribonucleoprotein U-like protein 1 isoform 1 [Mus musculus]	Hnrnpul1	mmR620	GRGGGGGFQR	42.3053
Q9D706	RNA polymerase II-associated protein 3 [Mus musculus]	Rpap3	mmR57	QGGVAEENLPPIRNGNFR	42.942
Q8BG05	heterogeneous nuclear ribonucleoprotein A3 isoform a [Mus musculus]	Hnrnpa3	mmR226; dmR239; mmR246	GGGSGNFMGRGGNFGGGGGNFGRGGNFGGR	43.0465
P61979	heterogeneous nuclear ribonucleoprotein K [Mus musculus]	Hnrnpk	mmR256; mmR258	GRPVGFPMRGRGGFDR; GRPVGFPMRGR	44.1885
Q9CY58	plasminogen activator inhibitor 1 RNA-binding protein isoform 1 [Mus musculus]	Serbp1	mmR366	KPANDITSQLEINFGDLGRPGRGGR; KPANDITSQLEINFGDLGRPGR	45.1186
Q61545	RNA-binding protein EWS [Mus musculus]	Ewsr1	mmR321	GGGRGGLGAGER	47.4331
Q60749	KH domain-containing, RNA-binding, signal transduction-associated protein 1 [Mus musculus]	Khdrbs1	mmR291	GRGAAPPPPPVPR	48.3539
P56959	RNA-binding protein FUS [Mus musculus]	Fus	mmR400	GGYGGGGSGGGGRGGFPSGGGGGGGQQR; GGPMGRGGYGGGGSGGGGRGGFPSGGGGGGGQQR	48.4732
Q9CY58	plasminogen activator inhibitor 1 RNA-binding protein isoform 1 [Mus musculus]	Serbp1	mmR363	KPANDITSQLEINFGDLGRPGRGGR	50.158
Q9CY58	plasminogen activator inhibitor 1 RNA-binding protein isoform 1 [Mus musculus]	Serbp1	mmR369	KPANDITSQLEINFGDLGRPGRGGR	50.1653
Q8BG05	heterogeneous nuclear ribonucleoprotein A3 isoform a [Mus musculus]	Hnrnpa3	dmR246; mmR257	GGNFGGRGGYGGGGGGSRGSYGGGDGGYNGFGGDGGNYGGGPGYSSR	51.9322
P56959	RNA-binding protein FUS [Mus musculus]	Fus	dmR381; mmR387	GRGGPMGRGGYGGGGSGGGGR	52.5261
A2AIV2	protein virilizer homolog [Mus musculus]	Kiaa1429	mmR1774	GRGGLGPSWASTNSGSGGSR	52.8118
Q80VD1	family with sequence similarity 98, member B [Mus musculus]	Fam98b	dmR410	GGYGGRGGYGGRGYGDPYGGGGGGGGGYR	53.4128
Q60865	caprin-1 isoform a [Mus musculus]	Caprin1	mmR688	GRGGPPRPNR	53.589
Q8JZP9	GAS2-like protein 1 isoform beta [Mus musculus]	Gas2l1	dmR397; mmR402; mmR406	RPTAPRSQSR	53.7986
Q80VD1	family with sequence similarity 98, member B [Mus musculus]	Fam98b	mmR380	GGWGGGGGWGGGGGSGGGWGGSGGGGGGR; GGWGGGGGWGGGGGSGGGWGGSGGGGGGRGGFQGR	55.3015
Q8BG05	heterogeneous nuclear ribonucleoprotein A3 isoform a [Mus musculus]	Hnrnpa3	dmR216; mmR226	GRGGGSGNFMGR; GRGGGSGNFMGRGGNFGGGGGNFGR	55.6469
Q8BG05	heterogeneous nuclear ribonucleoprotein A3 isoform a [Mus musculus]	Hnrnpa3	mmR226; mmR239; dmR246	GGGSGNFMGRGGNFGGGGGNFGRGGNFGGR	55.9663
Q8BG05	heterogeneous nuclear ribonucleoprotein A3 isoform a [Mus musculus]	Hnrnpa3	mmR216; dmR226	GRGGGSGNFMGRGGNFGGGGGNFGR	56.4131
Q8BG05	heterogeneous nuclear ribonucleoprotein A3 isoform a [Mus musculus]	Hnrnpa3	dmR216; mmR226; mmR239	GRGGGSGNFMGRGGNFGGGGGNFGR	56.7739
Q8BG05	heterogeneous nuclear ribonucleoprotein A3 isoform a [Mus musculus]; PREDICTED: heterogeneous nuclear ribonucleoprotein A3-like isoform 16 [Mus musculus]; heterogeneous nuclear ribonucleoprotein A3 isoform c [Mus musculus]	Hnrnpa3	mmR246	GGNFGGGGGNFGRGGNFGGR; GGNFGGRGGYGGGGGGSR	57.4774
O70133	ATP-dependent RNA helicase A [Mus musculus]	Dhx9	mmR1372	RGYGGGYFGQGR; GYGGGYFGQGRGGGGGGGY; GYGGGYFGQGR; RGYGGGYFGQGRGGGGGGGY	57.9118
Q8BQ46	TATA-binding protein-associated factor 2N [Mus musculus]	Taf15	mmR468	GGYGGDRGGYGGDR	58.8793
Q8BG05	heterogeneous nuclear ribonucleoprotein A3 isoform a [Mus musculus]; heterogeneous nuclear ribonucleoprotein A3 isoform c [Mus musculus]	Hnrnpa3	mmR239	GRGGGSGNFMGRGGNFGGGGGNFGR; GGNFGGGGGNFGRGGNFGGR; GGNFGGGGGNFGR	60.2179
Q3UFM5	nucleolar MIF4G domain-containing protein 1 [Mus musculus]	Nom1	dmR339	LRNEEVIDVHK	62.2713
P56959	RNA-binding protein FUS [Mus musculus]	Fus	mmR219	GRGGGGGYNR	63.3756
Q8BG05	heterogeneous nuclear ribonucleoprotein A3 isoform a [Mus musculus]	Hnrnpa3	mmR216; mmR226; mmR239	GRGGGSGNFMGRGGNFGGGGGNFGR	63.6861
Q569Z6	thyroid hormone receptor-associated protein 3 [Mus musculus]	Thrap3	dmR837; mmR841	GRGWGRGNYSGNNNNNSNNDFQK	63.8507
Q8BG05	heterogeneous nuclear ribonucleoprotein A3 isoform a [Mus musculus]	Hnrnpa3	mmR226; mmR239; mmR246	GGGSGNFMGRGGNFGGGGGNFGRGGNFGGR	64.5156
Q8BG05	heterogeneous nuclear ribonucleoprotein A3 isoform a [Mus musculus]	Hnrnpa3	mmR239; mmR246	GGNFGGGGGNFGRGGNFGGRGGYGGGGGGSR; GGNFGGGGGNFGRGGNFGGR	69.6541
P49312	heterogeneous nuclear ribonucleoprotein A1 isoform b [Mus musculus]; heterogeneous nuclear ribonucleoprotein A1 isoform a [Mus musculus]	Hnrnpa1	mmR218	GGGFGGNDNFGRGGNFSGR; SGSGNFGGGRGGGFGGNDNFGR	72.363
Q8VEK3	heterogeneous nuclear ribonucleoprotein U [Mus musculus]	Hnrnpu	mmR685	GRGGFNMR	73.9333
Q8BG05	heterogeneous nuclear ribonucleoprotein A3 isoform a [Mus musculus]	Hnrnpa3	mmR226; mmR246	GGGSGNFMGRGGNFGGGGGNFGRGGNFGGR	76.736
P53996	cellular nucleic acid-binding protein isoform 1 [Mus musculus]	Cnbp	mmR25; mmR27	ECPTGGGRGR	81.4509
Q569Z6	thyroid hormone receptor-associated protein 3 [Mus musculus]	Thrap3	dmR841	GRGWGRGNYSGNNNNNSNNDFQK	85.3923
P56959	RNA-binding protein FUS [Mus musculus]	Fus	mmR381	GRGGPMGR	88.5354
Q569Z6	thyroid hormone receptor-associated protein 3 [Mus musculus]	Thrap3	mmR837; mmR841	GRGWGRGNYSGNNNNNSNNDFQK	94.7379
Q8BG05	heterogeneous nuclear ribonucleoprotein A3 isoform a [Mus musculus]	Hnrnpa3	dmR239; mmR257	GGNFGGGGGNFGRGGNFGGRGGYGGGGGGSR	98.3837
Q8BG05	heterogeneous nuclear ribonucleoprotein A3 isoform a [Mus musculus]	Hnrnpa3	mmR239; mmR246; mmR257	GGNFGGGGGNFGRGGNFGGRGGYGGGGGGSR	99.3848
Q8BG05	heterogeneous nuclear ribonucleoprotein A3 isoform a [Mus musculus]; heterogeneous nuclear ribonucleoprotein A3 isoform c [Mus musculus]	Hnrnpa3	mmR239; dmR246	GGNFGGGGGNFGRGGNFGGRGGYGGGGGGSR; GGNFGGGGGNFGRGGNFGGR	100.128
Q8BG05	heterogeneous nuclear ribonucleoprotein A3 isoform a [Mus musculus]	Hnrnpa3	mmR216; mmR226	GRGGGSGNFMGR; GRGGGSGNFMGRGGNFGGGGGNFGR	101.793
Q8BG05	heterogeneous nuclear ribonucleoprotein A3 isoform a [Mus musculus]	Hnrnpa3	mmR239; dmR257	GGNFGGGGGNFGRGGNFGGRGGYGGGGGGSR	103.981
Q8VEK3	heterogeneous nuclear ribonucleoprotein U [Mus musculus]	Hnrnpu	dmR685; mmR691	GRGGFNMRGGNFR	107.656
Q7TMK9	heterogeneous nuclear ribonucleoprotein Q isoform 2 [Mus musculus]	Syncrip	mmR520	GRAGYSQR	109.098
Q9EQK5	major vault protein [Mus musculus]	Mvp	mmR49; mmR56	QDNERVLFAPVRMVTVPPR	114.936
Q9CX86	heterogeneous nuclear ribonucleoprotein A0 [Mus musculus]	Hnrnpa0	dmR199	GGGRGRGGGGGGGGR	118.996
Q8BG05	heterogeneous nuclear ribonucleoprotein A3 isoform a [Mus musculus]	Hnrnpa3	dmR226	GRGGGSGNFMGRGGNFGGGGGNFGR	120.04
P62996	transformer-2 protein homolog beta [Mus musculus]	Tra2b	dmR238; dmR241; dmR251	DYYSRSYRGGGGGGGGWR	128.088
Q8VHM5	heterogeneous nuclear ribonucleoprotein R [Mus musculus]	Hnrnpr	dmR501	GGYEDPYYGYDDGYAVRGR	128.882

## Sheet: admR IAP
Accession	Protein Descriptions	Gene Symbol	Sites	Peptides	Ratio (Prmt1KD/ControlKD)
Q3UM18	large subunit GTPase 1 homolog [Mus musculus]	Lsg1	dmR14	APGGGSLGRVLIR	0.00477579
Q60865	caprin-1 isoform a [Mus musculus]	Caprin1	mmR163	TVLELQYVLDKLGDDDVR; TVLELQYVLDKLGDDDVRTDLK	0.0138443
Q6ZWQ0	nesprin-2 [Mus musculus]	Syne2	dmR1135	SRVTSDFASEQER	0.0171277
Q9CY58	plasminogen activator inhibitor 1 RNA-binding protein isoform 1 [Mus musculus]; plasminogen activator inhibitor 1 RNA-binding protein isoform 2 [Mus musculus]	Serbp1	mmR216	RGGSGSHNWGTVKDELTESPK	0.0205407
Q9JKB3	DNA-binding protein A long isoform [Mus musculus]	Ybx3	dmR166	GAEAANVTGPDGVPVEGSRYAADR	0.02062
Q99LH9	SH3 domain-binding protein 5-like [Mus musculus]	Sh3bp5l	dmR164	AVSMHNAAREMVFVAEQGVMADKNR	0.023455
Q9JKB3	DNA-binding protein A long isoform [Mus musculus]	Ybx3	dmR216	NYAGEEEEEGSGSSEGFEPPAADGQFSGARNQLR	0.0236628
Q61545	RNA-binding protein EWS [Mus musculus]	Ewsr1	dmR470	GMPPPLRGGPGGPGGPGGPMGR	0.0247465
Q9CXZ1	NADH dehydrogenase [ubiquinone] iron-sulfur protein 4, mitochondrial [Mus musculus]	Ndufs4	mmR29	RAMATAAVSVCRVPSR	0.0250615
Q3TLH4	protein PRRC2C [Mus musculus]	Prrc2c	mmR282	GRGPPPSWASEPERPSILSASELK	0.0265551
Q569Z6	thyroid hormone receptor-associated protein 3 [Mus musculus]	Thrap3	dmR66	NHPRVYQNR	0.0277903
Q61545	RNA-binding protein EWS [Mus musculus]	Ewsr1	dmR614	RGGPGGPPGPLMEQMGGR	0.0290839
Q9JKB3	DNA-binding protein A short isoform [Mus musculus]; DNA-binding protein A long isoform [Mus musculus]	Ybx3	dmR161	GAEAANVTGPDGVPVEGSRYAADR	0.0295057
Q5SV80	myosin-XIX [Mus musculus]	Myo19	mmR376	RDCLAKLIYAR	0.0320548
A6H619	PHD and RING finger domain-containing protein 1 [Mus musculus]	Phrf1	mmR1033	SSTRSGSR	0.0331492
Q62318	transcription intermediary factor 1-beta [Mus musculus]	Trim28	mmR428	IVAERPGTNSTGPGPMAPPR	0.0346975
Q8CCS6	polyadenylate-binding protein 2 [Mus musculus]	Pabpn1	mmR234	TSLALDESLFR; TSLALDESLFRGR	0.0366265
Q9JKB3	DNA-binding protein A long isoform [Mus musculus]	Ybx3	dmR212	NYAGEEEEEGSGSSEGFEPPAADGQFSGARNQLR	0.0432457
O88569	heterogeneous nuclear ribonucleoproteins A2/B1 isoform 2 [Mus musculus]; heterogeneous nuclear ribonucleoproteins A2/B1 isoform 1 [Mus musculus]	Hnrnpa2b1	mmR213	GGNFGFGDSRGGGGNFGPGPGSNFR	0.0479741
Q14AX6	cyclin-dependent kinase 12 isoform 1 [Mus musculus]	Cdk12	dmR1471	LQNYGELGPGTTGANSSGTTLQWGGPAQSYGKPYRGAAR	0.048769
P27790	major centromere autoantigen B [Mus musculus]	Cenpb	dmR284	ALDTRMAAESRR	0.050512
O35245	polycystin-2 [Mus musculus]	Pkd2	dmR143	GLGSYRGAAHLSGR	0.0508748
P48722	heat shock 70 kDa protein 4L [Mus musculus]	Hspa4l	mmR632	NAVEEYVYDFR	0.0513658
Q9CY58	plasminogen activator inhibitor 1 RNA-binding protein isoform 1 [Mus musculus]	Serbp1	dmR216	RGGSGSHNWGTVKDELTESPK	0.0518237
Q921M4	Golgin subfamily A member 2 isoform b [Mus musculus]	Golga2	mmR558	EQLAELQNGFVR	0.0525236
Q61696	heat shock 70 kDa protein 1B [Mus musculus]	Hspa1a	mmR469	FELSGIPPAPR	0.0530533
Q8CCS6	polyadenylate-binding protein 2 [Mus musculus]	Pabpn1	mmR236	TSLALDESLFRGR	0.0536828
Q9CY57	Friend of PRMT1 protein [Mus musculus]	Chtop	mmR149; mmR153	AVAPRMGLR	0.0556178
P30416	peptidyl-prolyl cis-trans isomerase FKBP4 [Mus musculus]	Fkbp4	mmR373	RGEAHLAVNDFDLAR; GEAHLAVNDFDLAR	0.0566783
Q8BG05	heterogeneous nuclear ribonucleoprotein A3 isoform a [Mus musculus]	Hnrnpa3	mmR52	KLFIGGLSFETTDDSLR; LFIGGLSFETTDDSLR	0.0580725
Q80X50	ubiquitin-associated protein 2-like isoform 1 [Mus musculus]	Ubap2l	dmR187; dmR190	RGGRFSAQGMGTFNPADYAEPANTDDNYGNSSGNTWNNTGHFEPDDGTR	0.0589718
Q61545	RNA-binding protein EWS [Mus musculus]	Ewsr1	mmR463; dmR470	EGRGMPPPLRGGPGGPGGPGGPMGR	0.0595478
Q99PP7	E3 ubiquitin-protein ligase TRIM33 isoform 1 [Mus musculus]	Trim33	dmR551; dmR571	HQQLQQMRLQQPPAPIPTTTATTQQHPR	0.0606002
O88569	heterogeneous nuclear ribonucleoproteins A2/B1 isoform 1 [Mus musculus]	Hnrnpa2b1	dmR213; mmR228	GGNFGFGDSRGGGGNFGPGPGSNFRGGSDGYGSGR	0.066358
Q9D219	B-cell CLL/lymphoma 9 protein [Mus musculus]	Bcl9	mmR1253; mmR1259	IIPSEKPSQTLQYFPRGEVPGR	0.0674816
Q61545	RNA-binding protein EWS [Mus musculus]	Ewsr1	dmR470; mmR485	GMPPPLRGGPGGPGGPGGPMGR	0.0690152
Q9JKB3	DNA-binding protein A long isoform [Mus musculus]	Ybx3	mmR212; mmR216	NYAGEEEEEGSGSSEGFEPPAADGQFSGARNQLR	0.0696235
P61082	NEDD8-conjugating enzyme Ubc12 isoform 1 [Mus musculus]	Ube2m	mmR169	SMRGGYIGSTYFER	0.0707037
O88569	heterogeneous nuclear ribonucleoproteins A2/B1 isoform 1 [Mus musculus]	Hnrnpa2b1	mmR228	GGGGNFGPGPGSNFRGGSDGYGSGR	0.0716031
Q6A037	NEDD4-binding protein 1 [Mus musculus]	N4bp1	mmR394	ENKRLQEDR	0.0720367
Q61545	RNA-binding protein EWS [Mus musculus]	Ewsr1	dmR463; mmR470	EGRGMPPPLRGGPGGPGGPGGPMGR	0.0773136
P70333	heterogeneous nuclear ribonucleoprotein H2 [Mus musculus]	Hnrnph2	mmR233	RGAYGGGYGGYDDYGGYNDGYGFGSDR	0.0798754
Q00PI9	heterogeneous nuclear ribonucleoprotein U-like protein 2 [Mus musculus]	Hnrnpul2	dmR682	AYGQQYWGQSGNRGGYR	0.0832906
F6ZDS4	nuclear pore complex-associated protein Tpr [Mus musculus]	Tpr	dmR2413; dmR2422	QRGISHAMGGRGGINR	0.0834049
Q8VEK3	heterogeneous nuclear ribonucleoprotein U [Mus musculus]	Hnrnpu	dmR709; dmR715; mmR730	RGNMPQRGGGGGSGGIGYPYPR	0.0876862
P61458	pterin-4-alpha-carbinolamine dehydratase [Mus musculus]	Pcbd1	mmR31	AVGWNEVEGR	0.0911867
Q7TQI3	ubiquitin thioesterase OTUB1 [Mus musculus]	Otub1	mmR86; dmR94	TRPDGNCFYR	0.0945824
P62996	transformer-2 protein homolog beta [Mus musculus]	Tra2b	dmR241	SYRGGGGGGGGWR	0.0947641
Q8BG05	heterogeneous nuclear ribonucleoprotein A3 isoform a [Mus musculus]	Hnrnpa3	mmR377	SSGSPYGGGYGSGGGSGGYGSRR	0.098
Q91WJ8	far upstream element-binding protein 1 [Mus musculus]	Fubp1	mmR357; mmR359	GRGRGQGNWNMGPPGGLQEFNFIVPTGK	0.0984965
P49312	heterogeneous nuclear ribonucleoprotein A1 isoform b [Mus musculus]	Hnrnpa1	dmR206; dmR218	SGSGNFGGGRGGGFGGNDNFGR	0.100537
P56959	RNA-binding protein FUS [Mus musculus]	Fus	dmR400	GGYGGGGSGGGGRGGFPSGGGGGGGQQR	0.101206
Q60749	KH domain-containing, RNA-binding, signal transduction-associated protein 1 [Mus musculus]	Khdrbs1	dmR304; dmR310; mmR315	GRGVGPPRGALVR	0.10475
O70585	dystrobrevin alpha isoform 1 [Mus musculus]	Dtnb	dmR495	DELEQRMSALQESR	0.10602
Q8K4P0	WD repeat domain 33 isoform 1 [Mus musculus]	Wdr33	mmR1139	DNFPGPDDFGPEEGFDASDEAARGR; GRDNFPGPDDFGPEEGFDASDEAARGR	0.107921
O35245	polycystin-2 [Mus musculus]	Pkd2	mmR137; dmR143	GRGLGSYRGAAHLSGR	0.113105
Q5SFM8	RNA-binding protein 27 [Mus musculus]	Rbm27	dmR961; dmR963	GRGRGSLNHMVVDHRPK	0.114351
Q8VDM6	heterogeneous nuclear ribonucleoprotein U-like protein 1 isoform 1 [Mus musculus]	Hnrnpul1	dmR639; dmR645; dmR659	GPPGGNRGGFQNRGGGGGSGGGGGNYR	0.11457
Q8K4P0	WD repeat domain 33 isoform 1 [Mus musculus]	Wdr33	mmR1137	DNFPGPDDFGPEEGFDASDEAARGR; DNFPGPDDFGPEEGFDASDEAAR	0.114962
Q60749	KH domain-containing, RNA-binding, signal transduction-associated protein 1 [Mus musculus]	Khdrbs1	mmR304; dmR310; dmR315	GRGVGPPRGALVR	0.116568
Q60668	heterogeneous nuclear ribonucleoprotein D0 isoform d [Mus musculus]; heterogeneous nuclear ribonucleoprotein D0 isoform a [Mus musculus]; heterogeneous nuclear ribonucleoprotein D0 isoform c [Mus musculus]	Hnrnpd	dmR272; mmR278	EQYQQQQQWGSRGGFAGR	0.116831
Q3TLH4	protein PRRC2C [Mus musculus]	Prrc2c	mmR2641	STTPTSSPFRATSTSPNSQSSK	0.123101
Q9CW03	structural maintenance of chromosomes protein 3 [Mus musculus]	Smc3	dmR132	NDVMNLLESAGFSR	0.123317
Q6URW6	myosin-14 [Mus musculus]	Myh14	mmR1856	LAQAEEQLEQESR	0.123553
Q00PI9	heterogeneous nuclear ribonucleoprotein U-like protein 2 [Mus musculus]	Hnrnpul2	mmR682; mmR686	AYGQQYWGQSGNRGGYR	0.124598
Q8BG05	heterogeneous nuclear ribonucleoprotein A3 isoform a [Mus musculus]	Hnrnpa3	mmR378	SSGSPYGGGYGSGGGSGGYGSRR	0.126163
O88569	heterogeneous nuclear ribonucleoproteins A2/B1 isoform 1 [Mus musculus]	Hnrnpa2b1	mmR203; mmR213	SGRGGNFGFGDSRGGGGNFGPGPGSNFR; SGRGGNFGFGDSR	0.134317
Q8K1J6	CCA tRNA nucleotidyltransferase 1, mitochondrial isoform b [Mus musculus]	Trnt1	mmR126	LHEENFEVTTLR	0.134772
Q8K4P0	WD repeat domain 33 isoform 1 [Mus musculus]	Wdr33	dmR1309	SGSNWGRGSNMNSGPPR	0.139233
P49312	heterogeneous nuclear ribonucleoprotein A1 isoform a [Mus musculus]	Hnrnpa1	dmR319	NQGGYGGSSSSSSYGSGRRF	0.140339
Q91WT8	RNA-binding protein 47 [Mus musculus]	Rbm47	dmR396; mmR407	TPGPRGSYLGGYSAGR	0.140475
Q99MD6	thioredoxin reductase 3 isoform 1 [Mus musculus]	Txnrd3	dmR34	LGAVRGGLMSSPPGR	0.147875
Q9CY57	Friend of PRMT1 protein [Mus musculus]	Chtop	mmR91; dmR98	LGRPIGALARGAIGGR	0.149547
Q9WTV7	E3 ubiquitin-protein ligase RLIM [Mus musculus]	Rlim	mmR357	SQAPNNTVTYESERGGFR	0.152698
P97855	ras GTPase-activating protein-binding protein 1 [Mus musculus]	G3bp1	mmR445; mmR464	GPPRGGMVQKPGFGVGRGITTPR	0.152707
O89086	putative RNA-binding protein 3 isoform 1 [Mus musculus]	Rbm3	mmR118; mmR128	YDSRPGGYGYGYGR	0.153714
Q9JKB3	DNA-binding protein A long isoform [Mus musculus]	Ybx3	mmR212	NYAGEEEEEGSGSSEGFEPPAADGQFSGAR	0.159915
Q60865	caprin-1 isoform a [Mus musculus]	Caprin1	dmR696	GGPPRPNRGMPQMNTQQVN	0.163806
P97855	ras GTPase-activating protein-binding protein 1 [Mus musculus]	G3bp1	mmR445; mmR458	GPPRGGMVQKPGFGVGR	0.167495
O35071	kinesin-like protein KIF1C [Mus musculus]	Kif1c	dmR957	LQGLQGAGGRGGGLR	0.170861
O35071	kinesin-like protein KIF1C [Mus musculus]	Kif1c	mmR957; mmR962	LQGLQGAGGRGGGLR	0.170876
Q8CHY6	transcriptional repressor p66 alpha isoform a [Mus musculus]	Gatad2a	dmR536	GSATAPRGVLHTFSQSPK	0.17621
Q8C0L8	conserved oligomeric Golgi complex subunit 5 [Mus musculus]	Cog5	mmR283	VLTQPSQSAVRGGPGR	0.179538
Q3TLH4	protein PRRC2C [Mus musculus]	Prrc2c	dmR282	GRGPPPSWASEPERPSILSASELK	0.186235
P61979	heterogeneous nuclear ribonucleoprotein K [Mus musculus]	Hnrnpk	mmR316	NLPLPPPPPPRGGDLMAYDR	0.18656
Q5SFM8	RNA-binding protein 27 [Mus musculus]	Rbm27	dmR963	GRGSLNHMVVDHRPK	0.188305
E9Q2I4	hypothetical protein LOC238317 [Mus musculus]	Elmsan1	dmR196	VQLEVGRPQAPLNSFHAAK	0.189676
F8VQ05	protein furry homolog-like [Mus musculus]	Fryl	mmR1342	DRELMVTSR	0.189986
Q61545	RNA-binding protein EWS [Mus musculus]	Ewsr1	dmR454	KPPMNSMRGGMPPR	0.190499
Q922R8	protein disulfide-isomerase A6 [Mus musculus]	Pdia6	mmR409	GSTAPVGGGSFPTITPR	0.191114
Q8R2K4	TAF6-like RNA polymerase II p300/CBP-associated factor-associated factor 65 kDa subunit 6L isoform 1 [Mus musculus]	Taf6l	dmR555	GAPHFRFIIAGR	0.193958
D3YXK2	scaffold attachment factor B [Mus musculus]	Safb	dmR890; dmR896	SMSGHSGPGHMMNRGGMSGRGSFAPGGASR	0.194564
Q9CY57	Friend of PRMT1 protein [Mus musculus]	Chtop	dmR98	LGRPIGALARGAIGGR	0.19871
Q8VEK3	heterogeneous nuclear ribonucleoprotein U [Mus musculus]	Hnrnpu	dmR709; dmR715	RGNMPQRGGGGGSGGIGYPYPR	0.202298
Q62384	zinc finger protein ZPR1 [Mus musculus]	Zpr1	mmR152	GALTTVEGLISR	0.21022
P31324	cAMP-dependent protein kinase type II-beta regulatory subunit [Mus musculus]	Prkar2b	mmR194	EGEHVIDQGDDGDNFYVIDR	0.211797
Q9WV02	RNA binding motif protein, X-linked [Mus musculus]	Rbmx	mmR125	GPPSRGGHMDDGGYSMNFTMSSSR	0.212608
Q8VDM6	heterogeneous nuclear ribonucleoprotein U-like protein 1 isoform 1 [Mus musculus]	Hnrnpul1	dmR645; dmR659	GGFQNRGGGGGSGGGGGNYRGGFNR	0.216699
Q8VIJ6	splicing factor, proline- and glutamine-rich [Mus musculus]	Sfpq	dmR19; dmR25	RGGGGGRGGLHDFR	0.221909
Q810A7	ATP-dependent RNA helicase DDX42 [Mus musculus]	Ddx42	mmR12	RGFGFGGFAISAGK	0.225676
Q9CX86	heterogeneous nuclear ribonucleoprotein A0 [Mus musculus]	Hnrnpa0	dmR293	SNSGPYRGGYGGGYGGGSF	0.226136
P97445	voltage-dependent P/Q-type calcium channel subunit alpha-1A [Mus musculus]	Cacna1a	mmR2354	RGAHDAYSESEDDWC	0.232572
O88569	heterogeneous nuclear ribonucleoproteins A2/B1 isoform 2 [Mus musculus]	Hnrnpa2b1	mmR203	SGRGGNFGFGDSR	0.241121
O70133	ATP-dependent RNA helicase A [Mus musculus]	Dhx9	dmR1361; dmR1372	RGYGGGYFGQGRGGGGGGGY	0.249688
Q9JKB3	DNA-binding protein A short isoform [Mus musculus]	Ybx3	mmR161	GAEAANVTGPDGVPVEGSR	0.249774
Q9JKB3	DNA-binding protein A long isoform [Mus musculus]	Ybx3	dmR227; dmR228	QRRFPPYHVGQTFDR	0.252617
Q9D219	B-cell CLL/lymphoma 9 protein [Mus musculus]	Bcl9	dmR619	GERFPNPQGLSEEMFQQQLAEK	0.255531
Q60865	caprin-1 isoform a [Mus musculus]	Caprin1	mmR693; mmR696	GGPPRPNRGMPQMNTQQVN	0.258717
Q60749	KH domain-containing, RNA-binding, signal transduction-associated protein 1 [Mus musculus]	Khdrbs1	dmR304; dmR310	GRGVGPPRGALVR	0.258751
Q60668	heterogeneous nuclear ribonucleoprotein D0 isoform a [Mus musculus]	Hnrnpd	dmR272; dmR278	EQYQQQQQWGSRGGFAGR	0.261919
P97855	ras GTPase-activating protein-binding protein 1 [Mus musculus]	G3bp1	mmR458	GGMVQKPGFGVGR; GGMVQKPGFGVGRGITTPR	0.271043
E9PY46	intraflagellar transport 140 [Mus musculus]	Ift140	mmR832; dmR835	VCLGNMGHARGARALR	0.271212
Q60865	caprin-1 isoform a [Mus musculus]	Caprin1	mmR665	DYSGYQRDGYQQNFK	0.273561
B2RT41	proline/serine-rich coiled-coil 2 [Mus musculus]	Zfc3h1	dmR61; dmR88	RPPPPARGGGSGGGGGGSSSSSSSSQQQLRNFSR	0.276999
Q8VIJ6	splicing factor, proline- and glutamine-rich [Mus musculus]	Sfpq	mmR25; mmR32	GGGGGRGGLHDFRSPPPGMGLNQNR	0.277415
Q9D2D7	zinc finger protein 687 [Mus musculus]	Znf687	dmR1061	HGLPLGTQSSGRGGSLAR	0.286303
Q60749	KH domain-containing, RNA-binding, signal transduction-associated protein 1 [Mus musculus]	Khdrbs1	dmR331; mmR340	GATVTRGVPPPPTVR	0.297298
P29341	polyadenylate-binding protein 1 [Mus musculus]	Pabpc1	mmR481; dmR493	VMSTQRVANTSTQTMGPRPAAAAAAATPAVR	0.303912
O35071	kinesin-like protein KIF1C [Mus musculus]	Kif1c	mmR947; dmR957	QEQLRLQGLQGAGGRGGGLR	0.313116
Q8BR92	paralemmin-2 [Mus musculus]	Palm2	mmR10	AEAELHKER	0.324763
Q569Z6	thyroid hormone receptor-associated protein 3 [Mus musculus]	Thrap3	dmR91; dmR108	NRGFYPWGQYNRGGYGNYR	0.339331
Q569Z6	thyroid hormone receptor-associated protein 3 [Mus musculus]	Thrap3	dmR91; dmR101	NRGFYPWGQYNRGGYGNYR	0.339331
Q00PI9	heterogeneous nuclear ribonucleoprotein U-like protein 2 [Mus musculus]	Hnrnpul2	dmR686	AYGQQYWGQSGNRGGYR	0.33983
Q8BQ46	TATA-binding protein-associated factor 2N [Mus musculus]	Taf15	dmR324	RPEFMRGGGSGGGR	0.34088
Q6IRU2	tropomyosin alpha-4 chain [Mus musculus]	Tpm4	mmR27	IQALQQQADDAEDR	0.355994
Q61768	kinesin-1 heavy chain [Mus musculus]	Kif5b	mmR956	GGGSFVQNNQPVGLRGGGGK	0.356618
Q61545	RNA-binding protein EWS [Mus musculus]	Ewsr1	mmR470	GMPPPLRGGPGGPGGPGGPMGR	0.363793
Q8BQ89	LIX1-like protein [Mus musculus]	Lix1l	dmR18; mmR22	LQPGVGVGGRGTLR	0.364883
D3YXK2	scaffold attachment factor B [Mus musculus]	Safb	dmR890; dmR896; mmR906	SMSGHSGPGHMMNRGGMSGRGSFAPGGASR	0.36695
Q7TSC1	protein PRRC2C [Mus musculus]	Prrc2a	mmR55	RMPPPANLPSLK	0.37172
Q569Z6	thyroid hormone receptor-associated protein 3 [Mus musculus]	Thrap3	dmR837; dmR841	GRGWGRGNYSGNNNNNSNNDFQK	0.375985
P49312	heterogeneous nuclear ribonucleoprotein A1 isoform b [Mus musculus]	Hnrnpa1	dmR206; mmR218	SGSGNFGGGRGGGFGGNDNFGR	0.392132
Q60865	caprin-1 isoform a [Mus musculus]	Caprin1	mmR631	GPANGFRGGYDGYRPSFSNTPNSGYSQSQFTAPR	0.402688
P49312	heterogeneous nuclear ribonucleoprotein A1 isoform b [Mus musculus]; heterogeneous nuclear ribonucleoprotein A1 isoform a [Mus musculus]	Hnrnpa1	dmR206	SGSGNFGGGRGGGFGGNDNFGR	0.403142
Q99MD6	thioredoxin reductase 3 isoform 1 [Mus musculus]	Txnrd3	mmR29; mmR34	RLGAVRGGLMSSPPGR	0.407079
P14602	heat shock protein beta-1 [Mus musculus]	Hspb1	mmR38	LFDQAFGVPR	0.416299
Q6PDM2	serine/arginine-rich splicing factor 1 isoform 1 [Mus musculus]	Srsf1	mmR97	GTGRGGGGGGGGGAPR	0.451624
G3X9Z4	pre-mRNA cleavage complex II protein Pcf11 [Mus musculus]	Pcf11	dmR1092	FDGVPQRFDGPQHQQASR	0.451902
E9Q4N7	AT rich interactive domain 1B (Swi1 like) [Mus musculus]	Arid1b	mmR509; mmR517	RPQLYGMGTHPHSQPQQSSPYPGGSYGPPGAQRYPLGMQGR	0.452013
E9Q4N7	AT rich interactive domain 1B (Swi1 like) [Mus musculus]	Arid1b	dmR509	RPQLYGMGTHPHSQPQQSSPYPGGSYGPPGAQRYPLGMQGR	0.452013
E9Q4N7	AT rich interactive domain 1B (Swi1 like) [Mus musculus]	Arid1b	dmR517	RPQLYGMGTHPHSQPQQSSPYPGGSYGPPGAQRYPLGMQGR	0.452013
Q61687	transcriptional regulator ATRX [Mus musculus]	Atrx	dmR2457	GMYQSVAGGMQPPPLQRAPPPTVR	0.45872
A2AIV2	protein virilizer homolog [Mus musculus]	Kiaa1429	dmR1774; dmR1792	GRGGLGPSWASTNSGSGGSRGK	0.473545
Q8K4P0	WD repeat domain 33 isoform 1 [Mus musculus]	Wdr33	dmR1309; mmR1319	SGSNWGRGSNMNSGPPR	0.476099
Q6PDL0	cytoplasmic dynein 1 light intermediate chain 2 [Mus musculus]	Dync1li2	mmR397	TQGRGGPASVPSASPGTSVK	0.490827
O35071	kinesin-like protein KIF1C [Mus musculus]	Kif1c	dmR947; dmR957	QEQLRLQGLQGAGGRGGGLR	0.499668
Q60865	caprin-1 isoform a [Mus musculus]	Caprin1	mmR638	GPANGFRGGYDGYRPSFSNTPNSGYSQSQFTAPR; GGYDGYRPSFSNTPNSGYSQSQFTAPR	0.50582
Q61687	transcriptional regulator ATRX [Mus musculus]	Atrx	dmR2464	GMYQSVAGGMQPPPLQRAPPPTVR	0.512279
O88569	heterogeneous nuclear ribonucleoproteins A2/B1 isoform 1 [Mus musculus]	Hnrnpa2b1	mmR266	GFGDGYNGYGGGPGGGNFGGSPGYGGGR	0.52181
Q8VEK3	heterogeneous nuclear ribonucleoprotein U [Mus musculus]	Hnrnpu	dmR737; dmR743	GPVFPGRGGYSNR	0.541753
Q9DBR1	5'-3' exoribonuclease 2 [Mus musculus]	Xrn2	mmR922	MIQNQNAAFQPNQYQMLGGPGGYPPRR	0.546215
Q9D011	TTD non-photosensitive 1 protein homolog [Mus musculus]	Mplkip	dmR58; dmR67; dmR76	ARPYGSSQSPRHGGNFSGARFGSPSPGGYPGSYSR	0.559929
P29341	polyadenylate-binding protein 1 [Mus musculus]	Pabpc1	dmR493	VANTSTQTMGPRPAAAAAAATPAVR	0.572945
Q8BWS5	G protein-regulated inducer of neurite outgrowth 3 [Mus musculus]	Gprin3	dmR735; dmR748	GRQHGVLQSMLQNFR	0.585441
Q8BG05	heterogeneous nuclear ribonucleoprotein A3 isoform a [Mus musculus]	Hnrnpa3	mmR355	GGSFGGRSSGSPYGGGYGSGGGSGGYGSR	0.587789
Q9CY57	Friend of PRMT1 protein [Mus musculus]	Chtop	dmR129	TLLRGGMSLR	0.598854
P97855	ras GTPase-activating protein-binding protein 1 [Mus musculus]	G3bp1	mmR445; dmR458	GPPRGGMVQKPGFGVGRGITTPR	0.602393
O89086	putative RNA-binding protein 3 isoform 1 [Mus musculus]	Rbm3	mmR128	YDSRPGGYGYGYGR	0.627896
Q9DBR1	5'-3' exoribonuclease 2 [Mus musculus]	Xrn2	dmR947	KYPLPPPSGRYSWN; YPLPPPSGRYSWN	0.628115
P97855	ras GTPase-activating protein-binding protein 1 [Mus musculus]	G3bp1	mmR445; mmR458; mmR464	GPPRGGMVQKPGFGVGRGITTPR	0.630493
O54916	ralBP1-associated Eps domain-containing protein 1 isoform 1 [Mus musculus]	Reps1	dmR566	SSSLDMNR	0.631999
Q8R3P2	protein deltex-2 [Mus musculus]	Dtx2	dmR215	YRHSMTNLPAYPAPQAPHR	0.633462
Q8K4P0	WD repeat domain 33 isoform 1 [Mus musculus]	Wdr33	mmR1028	EFEGRGGPLPQEEK; LREFEGRGGPLPQEEK	0.63385
Q8VDM6	heterogeneous nuclear ribonucleoprotein U-like protein 1 isoform 1 [Mus musculus]	Hnrnpul1	mmR645; dmR659	GGFQNRGGGGGSGGGGGNYRGGFNR	0.640687
Q60668	heterogeneous nuclear ribonucleoprotein D0 isoform a [Mus musculus]; heterogeneous nuclear ribonucleoprotein D0 isoform c [Mus musculus]	Hnrnpd	mmR272; dmR278	EQYQQQQQWGSRGGFAGR	0.64358
Q3TLH4	protein PRRC2C [Mus musculus]	Prrc2c	mmR1159	DRDWFPDQGYR	0.649632
E9QAP7	transcription initiation factor TFIID subunit 4 [Mus musculus]	Taf4	dmR382	TPAATTGAIRATLTPTVLAPR	0.662378
Q8BU11	TOX high mobility group box family member 4 [Mus musculus]	Tox4	dmR479	VRINLQQQPPPLQSK	0.665985
E9Q4N7	AT rich interactive domain 1B (Swi1 like) [Mus musculus]	Arid1b	mmR477; mmR509; mmR517	RPQLYGMGTHPHSQPQQSSPYPGGSYGPPGAQRYPLGMQGR	0.687169
P29341	polyadenylate-binding protein 1 [Mus musculus]	Pabpc1	dmR493; mmR506	VANTSTQTMGPRPAAAAAAATPAVR	0.698738
Q91WJ8	far upstream element-binding protein 1 [Mus musculus]	Fubp1	dmR357; mmR359	GRGRGQGNWNMGPPGGLQEFNFIVPTGK	0.706258
Q8CI61	BAG family molecular chaperone regulator 4 [Mus musculus]	Bag4	mmR54	GRGGAPAETTWPGEGAGGDGYYPSGGAWAEASR	0.709811
P49312	heterogeneous nuclear ribonucleoprotein A1 isoform b [Mus musculus]	Hnrnpa1	mmR284	GGNFGGRSSGPYGGGGQYFAKPR	0.713951
Q7TSC1	protein PRRC2A isoform 1 [Mus musculus]	Prrc2a	dmR2040; dmR2048	VLPSPARPFAPSLGRAELHPVELKPFQDYR	0.718004
Q14B71	cell division cycle-associated protein 2 [Mus musculus]	Cdca2	dmR135	EPHFEGSPRLYR	0.726547
O70492	sorting nexin-3 [Mus musculus]	Snx3	mmR43	LITKPQNLNDAYGPPSNFLEIDVSNPQTVGVGRGR	0.744647
O09000	nuclear receptor coactivator 3 [Mus musculus]	Ncoa3	dmR1178; dmR1184; mmR1195	QLRMQLQQRLQGQQFLNQSR	0.758176
Q8BG05	heterogeneous nuclear ribonucleoprotein A3 isoform a [Mus musculus]	Hnrnpa3	dmR239	GGNFGGGGGNFGRGGNFGGRGGYGGGGGGSR	0.760663
Q8C796	REST corepressor 2 [Mus musculus]	Rcor2	dmR479; dmR498	FLQPRLAPNQPPPPLIRPALAASR	0.772297
Q91W92	cdc42 effector protein 1 [Mus musculus]	Cdc42ep1	mmR53	HTMHVGRGGDVFGDTSFLSNHGGR	0.783078
Q80XS6	protein Smaug homolog 2 [Mus musculus]	Samd4b	dmR608	MGLLSPSGIGGVSPRHALTSPSLGGQGR	0.7841
Q99PP7	E3 ubiquitin-protein ligase TRIM33 isoform 1 [Mus musculus]	Trim33	dmR571; dmR593	LQQPPAPIPTTTATTQQHPRQAAPQMLQQQPPRLISVQTMQR	0.794405
Q8VIJ6	splicing factor, proline- and glutamine-rich [Mus musculus]	Sfpq	mmR673; mmR685	FGQGGAGPVGGQGPRGMGPGTPAGYGR	0.795907
Q9Z1Y4	thyroid receptor-interacting protein 6 [Mus musculus]	Trip6	mmR242	SHREPGPGVPEGPSGVHIPAGGGRGGGHEPQGPLGQPPEEELER	0.796997
Q8C796	REST corepressor 2 [Mus musculus]	Rcor2	dmR491	LAPNQPPPPLIRPALAASR	0.79749
A2BH40	AT-rich interactive domain-containing protein 1A [Mus musculus]	Arid1a	dmR431	MRPQPYGGTNPYSQQQGPPSGPQQGHGYPGQPYGSQTPQRYPMTMQGR	0.798072
Q8R326	paraspeckle component 1 [Mus musculus]	Pspc1	mmR507	TGSETPQAPMSGVGPVSGGPGGFGRGSQGGNFEGPNKR; TGSETPQAPMSGVGPVSGGPGGFGRGSQGGNFEGPNK	0.799547
Q8VIJ6	splicing factor, proline- and glutamine-rich [Mus musculus]	Sfpq	dmR673	FGQGGAGPVGGQGPRGMGPGTPAGYGR	0.800319
Q3TLH4	PREDICTED: protein BAT2-like 2-like [Mus musculus]	Prrc2c	dmR2775	AEVLQSTQRFFSEQQQNK	0.80037
Q8VIJ6	splicing factor, proline- and glutamine-rich [Mus musculus]	Sfpq	dmR685	FGQGGAGPVGGQGPRGMGPGTPAGYGR	0.800949
Q61545	RNA-binding protein EWS [Mus musculus]	Ewsr1	dmR614; mmR631	RGGPGGPPGPLMEQMGGR	0.806067
Q9Z1S0	mitotic checkpoint serine/threonine-protein kinase BUB1 beta [Mus musculus]	Bub1b	mmR249	APGQSRGFLNAVPQPVHGNR	0.810366
Q61026	nuclear receptor coactivator 2 isoform a [Mus musculus]	Ncoa2	dmR1173; dmR1177; dmR1190	MQPRPGLRPTGIVQNQPNQLRLQLQHR	0.81357
Q8C796	REST corepressor 2 [Mus musculus]	Rcor2	dmR479; mmR491; mmR498	FLQPRLAPNQPPPPLIRPALAASR	0.81785
Q61687	transcriptional regulator ATRX [Mus musculus]	Atrx	mmR2457; dmR2464	GMYQSVAGGMQPPPLQRAPPPTVR	0.818257
O88291	zinc finger protein 326 [Mus musculus]	Znf326	dmR175	GRGTPAYPESTFGSR	0.821078
Q9Z138	tyrosine-protein kinase transmembrane receptor ROR2 precursor [Mus musculus]	Ror2	dmR785	SWGNLSNYNSSAQTSGASNTTQTSSLSTSPVSNVSNARYMAPK	0.821801
Q8CGF7	transcription elongation regulator 1 [Mus musculus]	Tcerg1	dmR28	MAQQQALRFR	0.827748
Q8CCS6	polyadenylate-binding protein 2 [Mus musculus]	Pabpn1	dmR275; dmR283; dmR285	SRFYSGFNSRPR	0.837369
Q8CGF7	transcription elongation regulator 1 [Mus musculus]	Tcerg1	dmR28; dmR30	MAQQQALRFRGPAPPPNAVMR	0.838505
Q8K4P0	WD repeat domain 33 isoform 1 [Mus musculus]	Wdr33	mmR1023	LREFEGRGGPLPQEEK	0.838657
Q8CCS6	polyadenylate-binding protein 2 [Mus musculus]	Pabpn1	dmR255; dmR259	TNRPGISTTDRGFPR	0.841814
Q08775	runt-related transcription factor 2 isoform type II [Mus musculus]	Runx2	dmR353	VGVPPQNPRPSLNSAPSPFNPQGQSQITDPR	0.845171
Q9QYS9	protein quaking isoform 3 [Mus musculus]	Qki	mmR242	IITGPAPVLPPAALR	0.847129
Q9WUU8	TNFAIP3-interacting protein 1 isoform 1 [Mus musculus]	Tnip1	dmR584	DWSQIRYPPPPVPMEHPPPHPNSR	0.848315
F6ZDS4	nuclear pore complex-associated protein Tpr [Mus musculus]	Tpr	mmR2174	RQSVGRGLQLTPGIGGMQQHFFDDEDR	0.849725
Q5PRE5	hypothetical protein LOC212127 [Mus musculus]	Proser1	dmR613; mmR624	GPAHPGTPVRGTLGLSGALGR	0.850763
A2AIV2	protein virilizer homolog [Mus musculus]	Kiaa1429	dmR1772; dmR1774	ASRGRGGLGPSWASTNSGSGGSR	0.851313
Q80W00	serine/threonine-protein phosphatase 1 regulatory subunit 10 isoform 2 [Mus musculus]	Ppp1r10	mmR665; mmR674	GMQHFPPGPGGPMPGPHGGPGGPVGPRLLGPPPPSR	0.853312
Q8BRH4	histone-lysine N-methyltransferase MLL3 [Mus musculus]	Kmt2c	dmR4132	VNPSLEYRQHLLLR	0.857604
Q8BI84	melanoma inhibitory activity protein 3 precursor [Mus musculus]	Mia3	dmR1881	EFFIPGTRLPPPTHGPQEYPPPPPAVR	0.858772
Q3U5F4	yrdC domain-containing protein, mitochondrial precursor [Mus musculus]	Yrdc	mmR29	AAVAAGMGLSDGPASSGRGCR	0.861306
Q3U5F4	yrdC domain-containing protein, mitochondrial precursor [Mus musculus]	Yrdc	mmR32	AAVAAGMGLSDGPASSGRGCR	0.86527
Q8C9B9	death-inducer obliterator 1 isoform 3 [Mus musculus]	Dido1	mmR1858	GLSPSYLGGPRGGAPAQFEDR	0.865426
Q80W00	serine/threonine-protein phosphatase 1 regulatory subunit 10 isoform 2 [Mus musculus]	Ppp1r10	dmR665	GMQHFPPGPGGPMPGPHGGPGGPVGPRLLGPPPPSR	0.866577
E9PZM7	splicing factor, arginine/serine-rich 2, interacting protein [Mus musculus]	Scaf11	mmR1168	SGWTSASSWAVRK	0.868706
Q7TSC1	protein PRRC2A isoform 1 [Mus musculus]	Prrc2a	dmR2090	TPPSGRPFSGLNSRLK	0.870876
O35126	atrophin-1 [Mus musculus]	Atn1	dmR987; dmR997	ERLALAAGPALRPDMSYAER	0.873168
G3X9Z4	pre-mRNA cleavage complex II protein Pcf11 [Mus musculus]	Pcf11	dmR1073; mmR1085	TGQPGPQRFDGPPGQQVQPR	0.874397
B2RQG2	PHD finger protein 3 [Mus musculus]	Phf3	dmR1861	MMGPLSQASRYMGPQNFYQVK	0.875081
P56959	RNA-binding protein FUS [Mus musculus]	Fus	dmR387; dmR400	GGPMGRGGYGGGGSGGGGRGGFPSGGGGGGGQQR	0.877183
Q8BRH4	histone-lysine N-methyltransferase MLL3 [Mus musculus]	Kmt2c	dmR2447	SPVIPPLGPRYAVFPK	0.888787
Q60838	segment polarity protein dishevelled homolog DVL-2 [Mus musculus]	Dvl2	dmR231	FSSSTEQSSASRLLK	0.891162
E9QAM5	PPAR gamma-DNA-binding domain interacting protein1 [Mus musculus]	Helz2	mmR2381	LVSELRWPIPGPR	0.893401
Q99PP7	E3 ubiquitin-protein ligase TRIM33 isoform 1 [Mus musculus]	Trim33	dmR620	IPGIPRHSAPQYSMMQPHLQR	0.898504
Q6NXI6	regulation of nuclear pre-mRNA domain-containing protein 2 [Mus musculus]	Rprd2	dmR1462; dmR1468	RPFFPPRY	0.900797
Q08775	runt-related transcription factor 2 isoform type II [Mus musculus]	Runx2	dmR344; dmR353	IPHPSMRVGVPPQNPRPSLNSAPSPFNPQGQSQITDPR	0.902225
F6ZDS4	nuclear pore complex-associated protein Tpr [Mus musculus]	Tpr	mmR2179	QSVGRGLQLTPGIGGMQQHFFDDEDR; RQSVGRGLQLTPGIGGMQQHFFDDEDR	0.904719
Q6PGA0	REST corepressor 3 [Mus musculus]	Rcor3	dmR401; dmR421	FIQPRPTLNQPPPPLIRPANSMPPR	0.905648
Q8JZP9	GAS2-like protein 1 isoform beta [Mus musculus]	Gas2l1	mmR630	SSLAGPEPSLTWAR	0.914384
Q7TSC1	protein PRRC2A isoform 1 [Mus musculus]	Prrc2a	dmR2082; dmR2090	TPPSGRPFSGLNSRLK	0.915351
Q9DBR1	5'-3' exoribonuclease 2 [Mus musculus]	Xrn2	dmR880	GPPPLFQQHRFER	0.91693
Q8BIQ5	cleavage stimulation factor subunit 2 [Mus musculus]	Cstf2	dmR471; mmR478	GMDTRGPVPGPRGPMPSGIQGPNPMNMGAVVPQGSR	0.917672
Q3U0V1	far upstream element-binding protein 2 [Mus musculus]	Khsrp	dmR414; mmR416	GRGRGQGNWGPPGGEMTFSIPTHK	0.927177
Q8BIH0	histone deacetylase complex subunit SAP130 [Mus musculus]	Sap130	dmR206	SNAPGPPLHIGASHLPRGAAAAAVMSSSK	0.929297
Q9JIY2	E3 ubiquitin-protein ligase Hakai [Mus musculus]	Cbll1	dmR465; dmR485; dmR487	GPPPPPRMQGPPSQTPLPGPHHPDQTRYRPYYQ	0.931313
Q8K4P0	WD repeat domain 33 isoform 1 [Mus musculus]	Wdr33	dmR16	FFHMPRFQHQAPR	0.934022
O09000	nuclear receptor coactivator 3 [Mus musculus]	Ncoa3	dmR1195	LQGQQFLNQSRQALEMK	0.937383
Q6P4S6	serine/threonine-protein kinase SIK3 [Mus musculus]	Sik3	dmR976	HSLTGHSDIRLPPAEFAQLIK	0.938775
P63325	40S ribosomal protein S10 [Mus musculus]	Rps10	mmR153	KAEAGAGSATEFQFR	0.94029
E9Q4N7	AT rich interactive domain 1B (Swi1 like) [Mus musculus]	Arid1b	dmR477; dmR509	RPQLYGMGTHPHSQPQQSSPYPGGSYGPPGAQRYPLGMQGR	0.943165
Q6NXI6	regulation of nuclear pre-mRNA domain-containing protein 2 [Mus musculus]	Rprd2	dmR1438	EAFLGRDPFHSLK	0.943545
P83882	60S ribosomal protein L36a [Mus musculus]	Rpl36a	mmR57	QSGYGGQTKPIFR	0.947235
Q9D032	single-stranded DNA-binding protein 3 isoform a [Mus musculus]	Ssbp3	dmR202	QQGHPNMGGSMQRMNPPR	0.948284
Q8VI33	adenylate kinase isoenzyme 6 isoform 1 [Mus musculus]	Taf9	dmR128	YCLTAPNYRLK	0.949858
Q7TSC1	protein PRRC2A isoform 1 [Mus musculus]	Prrc2a	mmR2082; dmR2090	TPPSGRPFSGLNSRLK	0.949879
Q64152	transcription factor BTF3 isoform 1 [Mus musculus]	Btf3	mmR19	ARGGWPGAEATPSLPLGGSR	0.950288
Q9D011	TTD non-photosensitive 1 protein homolog [Mus musculus]	Mplkip	dmR76	HGGNFSGARFGSPSPGGYPGSYSR	0.954623
Q8BWW4	la-related protein 4 isoform 2 [Mus musculus]	Larp4	mmR440	EAPILQMEQNGDFGRGR	0.961103
Q8BWW4	la-related protein 4 isoform 2 [Mus musculus]	Larp4	mmR438	EAPILQMEQNGDFGRGR	0.961103
O09000	nuclear receptor coactivator 3 [Mus musculus]	Ncoa3	dmR1178; dmR1184	QLRMQLQQRLQGQQFLNQSR	0.961936
Q9CQB2	hypothetical protein LOC68241 [Mus musculus]	Fam195a	dmR35; dmR70	CRQPVPPTALPAHLQPSAQTQGPWPLASSGPRLVFNR	0.964809
Q9CQB2	hypothetical protein LOC68241 [Mus musculus]	Fam195a	dmR35; dmR65	CRQPVPPTALPAHLQPSAQTQGPWPLASSGPRLVFNR	0.964809
Q6PEV3	WAS/WASL-interacting protein family member 2 [Mus musculus]	Wipf2	dmR37	NRGALLQDICK	0.969306
Q61191	host cell factor 1 [Mus musculus]	Hcfc1	dmR855	TVPMGGVRLVTPVTVSAVKPAVTTLVVK	0.977096
P08113	endoplasmin [Mus musculus]	Hsp90b1	dmR345	TVWDWELMNDIKPIWQRPSK	0.979431
Q6PHQ9	polyadenylate-binding protein 4 isoform 1 [Mus musculus]	Pabpc4	dmR459; dmR463	QSGPRPALRHLAPTGNAPASR	0.981391
Q8R311	cutaneous T-cell lymphoma-associated antigen 5 homolog isoform 1 [Mus musculus]	Ctage5	dmR733; dmR742	TVYAPRGFPPYLPPRAGFFPPPPHPESR	0.983212
O09000	nuclear receptor coactivator 3 [Mus musculus]	Ncoa3	dmR1184	MQLQQRLQGQQFLNQSR	0.988333
Q8CHY6	transcriptional repressor p66 alpha isoform a [Mus musculus]	Gatad2a	mmR221	IPGSIIPPPLVRGGQQVSAK	0.988542
P70365	nuclear receptor coactivator 1 [Mus musculus]	Ncoa1	dmR1137	QIIQQQRAMLMR	0.988819
Q99MU3	double-stranded RNA-specific adenosine deaminase isoform 3 [Mus musculus]	Adar	dmR30; mmR42	WRYPQPQGPESYPR	0.990121
Q8C9B9	death-inducer obliterator 1 isoform 3 [Mus musculus]	Dido1	dmR1993; dmR2004	FAGQRASAPLPYGGPRGPAPFPEK	0.994786
Q99MU3	double-stranded RNA-specific adenosine deaminase isoform 3 [Mus musculus]	Adar	dmR30	WRYPQPQGPESYPR	0.996681
Q8BZ32	putative Polycomb group protein ASXL2 [Mus musculus]	Asxl2	dmR594	ARFPISITSPYR	1.00067
Q9CQF3	cleavage and polyadenylation specificity factor subunit 5 [Mus musculus]	Nudt21	mmR15	SQTGWPRGVNQFGNK	1.00182
O55201	transcription elongation factor SPT5 [Mus musculus]	Supt5h	mmR690	ISSPMHPSAEGQHGGFGSPGGMSR	1.00414
Q67FY2	B-cell CLL/lymphoma 9-like protein [Mus musculus]	Bcl9l	mmR983; dmR991	SPQVLSSSLGVRSPTGSPSRLK	1.00431
Q67FY2	B-cell CLL/lymphoma 9-like protein [Mus musculus]	Bcl9l	dmR677	VREELLRHQLLEK; EELLRHQLLEK	1.00454
Q60668	heterogeneous nuclear ribonucleoprotein D0 isoform a [Mus musculus]	Hnrnpd	mmR278	EQYQQQQQWGSRGGFAGR	1.00691
Q6NXI6	regulation of nuclear pre-mRNA domain-containing protein 2 [Mus musculus]	Rprd2	dmR1468	RPFFPPRY	1.00805
Q99PP7	E3 ubiquitin-protein ligase TRIM33 isoform 1 [Mus musculus]	Trim33	dmR614; dmR620	LAQNAARIPGIPRHSAPQYSMMQPHLQR	1.00838
Q9EST3	eukaryotic translation initiation factor 4E transporter isoform a [Mus musculus]	Eif4enif1	dmR774	SSCSTPLSQTSRYTK	1.00903
Q9WU42	nuclear receptor corepressor 2 [Mus musculus]	Ncor2	dmR1538	EPTPRLQEGSLLSSK	1.00962
Q9DBR1	5'-3' exoribonuclease 2 [Mus musculus]	Xrn2	dmR851	GSGTSVYTNTALPPANYQGNNYRPLLR	1.0123
Q9DBR1	5'-3' exoribonuclease 2 [Mus musculus]	Xrn2	mmR847; mmR851	GSGTSVYTNTALPPANYQGNNYRPLLR	1.01243
Q9DBR1	5'-3' exoribonuclease 2 [Mus musculus]	Xrn2	dmR847	GSGTSVYTNTALPPANYQGNNYRPLLR	1.01246
O70305	ataxin-2 [Mus musculus]	Atxn2	mmR609	VSAGRGSMSSGLEFVSHNPPSEAAAPPVAR	1.0146
P27048	small nuclear ribonucleoprotein-associated protein B [Mus musculus]	Snrpb	dmR108; dmR112	VPLAGAAGGPGIGRAAGRGIPAGVPMPQAPAGLAGPVR	1.01655
A2A654	bromodomain PHD finger transcription factor [Mus musculus]	Bptf	mmR2156	VLGIIPSTTGPSQQTFTSFQPR	1.01764
Q6PDK2	histone-lysine N-methyltransferase MLL2 [Mus musculus]	Kmt2d	dmR4255	SGPAPQSGQGPPGAGVMPTVGQLRAQLQGVLAK	1.0199
O09000	nuclear receptor coactivator 3 [Mus musculus]	Ncoa3	dmR1184; dmR1195	MQLQQRLQGQQFLNQSRQALEMK	1.03221
Q67FY2	B-cell CLL/lymphoma 9-like protein [Mus musculus]	Bcl9l	mmR672; dmR677	VREELLRHQLLEK	1.03473
D3YXK2	scaffold attachment factor B [Mus musculus]	Safb	dmR890; mmR896	SMSGHSGPGHMMNRGGMSGRGSFAPGGASR	1.03583
Q8K1I7	WAS/WASL-interacting protein family member 1 [Mus musculus]	Wipf1	dmR33	TEQAGRNALLSDISK	1.036
Q99PP7	E3 ubiquitin-protein ligase TRIM33 isoform 1 [Mus musculus]	Trim33	mmR584; mmR593	QAAPQMLQQQPPRLISVQTMQR	1.03624
Q60668	heterogeneous nuclear ribonucleoprotein D0 isoform d [Mus musculus]; heterogeneous nuclear ribonucleoprotein D0 isoform a [Mus musculus]	Hnrnpd	mmR272	EQYQQQQQWGSRGGFAGR	1.03867
D3Z3N4	heterogeneous nuclear ribonucleoprotein H3 [Mus musculus]	Hnrnph3	mmR323	MGMGNSYSGGYGAPDGLGGYGRGGGGSGGYYGQGGMSGGGWR; MGMGNSYSGGYGAPDGLGGYGR	1.04118
Q99MD6	thioredoxin reductase 3 isoform 1 [Mus musculus]	Txnrd3	mmR34	LGAVRGGLMSSPPGR	1.04126
Q6PHQ9	polyadenylate-binding protein 4 isoform 1 [Mus musculus]	Pabpc4	dmR525; dmR534	LAMDFGGAGAAQQGLTDSCQSGGVPTAVPNLAPRAAVAAAAPRAVAPYK; LAMDFGGAGAAQQGLTDSCQSGGVPTAVPNLAPRAAVAAAAPR	1.0425
Q3U0V1	far upstream element-binding protein 2 [Mus musculus]	Khsrp	mmR412	SGPPGPPGAPGMPPGGR	1.04344
Q8R311	cutaneous T-cell lymphoma-associated antigen 5 homolog isoform 1 [Mus musculus]	Ctage5	dmR714	DYFPPRDFPGPPLPPFPGR	1.04395
O35691	pinin [Mus musculus]	Pnn	mmR54; mmR56	LLALSGPGGGRGR	1.0479
Q9Z1Y4	thyroid receptor-interacting protein 6 [Mus musculus]	Trip6	dmR25	SLPRGALGPPTAHGATLQPHPR	1.05081
Q8CCS6	polyadenylate-binding protein 2 [Mus musculus]	Pabpn1	dmR255; mmR259	TNRPGISTTDRGFPR	1.05153
Q9ERU9	E3 SUMO-protein ligase RanBP2 [Mus musculus]	Ranbp2	dmR1015	SNFVQPMQGEVIRPPLTTPAHTTQPTPFK	1.0587
Q80YV2	nuclear-interacting partner of ALK [Mus musculus]	Zc3hc1	mmR33	SPEGTPQKVRELIDEGIVPEEGGTEPK	1.06251
Q9WUU9	80 kDa MCM3-associated protein [Mus musculus]	Mcm3ap	dmR32	SPFRFGQPSLFGQNSTPSK	1.06435
E9PWH2	caspase recruitment domain family, member 6 [Mus musculus]	Card6	dmR778	YLQPWRFYSR	1.07026
Q8CGF7	transcription elongation regulator 1 [Mus musculus]	Tcerg1	dmR20; dmR28	FNPGELRMAQQQALR	1.07219
A2AGH6	mediator of RNA polymerase II transcription subunit 12 [Mus musculus]	Med12	dmR1901	TSVYRQQQPTVPQGQR	1.07296
Q8R089	probable fibrosin-1 [Mus musculus]	Fbrs	mmR376; mmR379	CAGFPEPTWLAGPPRLARPPR	1.07428
Q61687	transcriptional regulator ATRX [Mus musculus]	Atrx	dmR2457; dmR2464	GMYQSVAGGMQPPPLQRAPPPTVRSK	1.07639
Q8CGF7	transcription elongation regulator 1 [Mus musculus]	Tcerg1	dmR28; dmR30; dmR41	MAQQQALRFRGPAPPPNAVMR	1.07783
Q8BTI8	serine/arginine repetitive matrix protein 2 [Mus musculus]	Srrm2	mmR2295	TPQAPTPANLVVGPR	1.0787
Q9JL19	nuclear receptor coactivator 6 isoform 1 [Mus musculus]	Ncoa6	dmR1050	SIRLPVSQNVHPPR	1.07967
A2AJK6	chromodomain-helicase-DNA-binding protein 7 [Mus musculus]	Chd7	dmR289	FSPNPPQQGAVRPQTLNFSSR	1.08002
P11087	collagen alpha-1(I) chain precursor [Mus musculus]	Col1a1	dmR1073	GETGPAGPAGPIGPAGAR	1.0815
A2AJK6	chromodomain-helicase-DNA-binding protein 7 [Mus musculus]	Chd7	dmR280	FSPNPPQQGAVRPQTLNFSSR	1.08196
Q9Z1Y4	thyroid receptor-interacting protein 6 [Mus musculus]	Trip6	dmR25; mmR43	SLPRGALGPPTAHGATLQPHPR	1.08469
Q9DBR1	5'-3' exoribonuclease 2 [Mus musculus]	Xrn2	dmR847; dmR851	GSGTSVYTNTALPPANYQGNNYRPLLR	1.08529
A2ABV5	mediator of RNA polymerase II transcription subunit 14 isoform b [Mus musculus]	Med14	dmR1128	AGNWPGSPQVSGPSPATRLPGMSPANPSLHSPVPDVSHSPR	1.08967
Q99PP7	E3 ubiquitin-protein ligase TRIM33 isoform 1 [Mus musculus]	Trim33	dmR531	TPGQINLAQLRLQHMQQQVYAQK	1.0944
A2BH40	AT-rich interactive domain-containing protein 1A [Mus musculus]	Arid1a	mmR431	MRPQPYGGTNPYSQQQGPPSGPQQGHGYPGQPYGSQTPQRYPMTMQGR	1.09501
Q61026	nuclear receptor coactivator 2 isoform a [Mus musculus]	Ncoa2	dmR880	MSQSTFNNPRPGQLGR	1.09584
Q61026	nuclear receptor coactivator 2 isoform a [Mus musculus]	Ncoa2	dmR864; dmR874	AALRMSQSTFNNPRPGQLGR	1.09717
Q8K4P0	WD repeat domain 33 isoform 1 [Mus musculus]	Wdr33	dmR909	APLLGDGPRAPFNQEGQSTGPPPLIPGLGQQGAQGR	1.10609
Q8CIE2	zinc finger MIZ domain-containing protein 2 isoform 1 [Mus musculus]	Zmiz2	dmR245; dmR262	AAGMTPLYAGQRLPQHGYPGPPQGQPLPRQGIK	1.10784
Q6DID3	protein SCAF8 [Mus musculus]	Scaf8	dmR1071	ENLVRPSLDHLGR	1.12338
Q8CCS6	polyadenylate-binding protein 2 [Mus musculus]	Pabpn1	mmR255; mmR259	TNRPGISTTDRGFPR	1.14047
P63017	heat shock cognate 71 kDa protein [Mus musculus]	Hspa8	mmR469	FELTGIPPAPR	1.1419
Q922X9	protein arginine N-methyltransferase 7 [Mus musculus]	Prmt7	mmR32	ANPTTGSLEWLEEDEHYDYHQEIAR	1.14261
Q8CCS6	polyadenylate-binding protein 2 [Mus musculus]	Pabpn1	dmR255	TNRPGISTTDRGFPR	1.14304
Q9CQB2	hypothetical protein LOC68241 [Mus musculus]	Fam195a	dmR35; mmR65; mmR70	CRQPVPPTALPAHLQPSAQTQGPWPLASSGPRLVFNR	1.14339
Q8CCS6	polyadenylate-binding protein 2 [Mus musculus]	Pabpn1	dmR259	TNRPGISTTDRGFPR	1.14503
Q6Y7W8	PERQ amino acid-rich with GYF domain-containing protein 2 isoform a [Mus musculus]	Gigyf2	mmR154	SFDEVEGVFGRGGGR	1.14969
Q9Z103	activity-dependent neuroprotector homeobox protein [Mus musculus]	Adnp	dmR68	SVGQSYGVGQSVRLGLGGNAPVSIPQQSQSVK	1.15217
Q9JK92	heat shock protein beta-8 [Mus musculus]	Hspb8	dmR78	GPPATARFGVPAEGR	1.1522
Q6Y7W8	PERQ amino acid-rich with GYF domain-containing protein 2 isoform b [Mus musculus]; PERQ amino acid-rich with GYF domain-containing protein 2 isoform a [Mus musculus]	Gigyf2	mmR150	SFDEVEGVFGRGGGR; SFDEVEGVFGR	1.15443
Q60865	caprin-1 isoform a [Mus musculus]	Caprin1	dmR631	GPANGFRGGYDGYRPSFSNTPNSGYSQSQFTAPR	1.15877
Q60865	caprin-1 isoform a [Mus musculus]	Caprin1	dmR638	GPANGFRGGYDGYRPSFSNTPNSGYSQSQFTAPR; GGYDGYRPSFSNTPNSGYSQSQFTAPR	1.15877
Q8VIJ6	splicing factor, proline- and glutamine-rich [Mus musculus]	Sfpq	mmR673	FGQGGAGPVGGQGPRGMGPGTPAGYGR; FGQGGAGPVGGQGPR	1.16093
Q3U0V1	far upstream element-binding protein 2 [Mus musculus]	Khsrp	mmR414; mmR416	GRGRGQGNWGPPGGEMTFSIPTHK	1.1616
Q6PGA0	REST corepressor 3 [Mus musculus]	Rcor3	dmR401; dmR413	FIQPRPTLNQPPPPLIRPANSMPPR	1.16802
E9Q4N7	AT rich interactive domain 1B (Swi1 like) [Mus musculus]	Arid1b	dmR358	AAAGAAAAAGGFQRFAGQNQHPSGATPTLNQLLTSPSPMMR	1.17175
Q67FY2	B-cell CLL/lymphoma 9-like protein [Mus musculus]	Bcl9l	dmR983; dmR991	SPQVLSSSLGVRSPTGSPSRLK	1.1736
Q9JKB3	DNA-binding protein A long isoform [Mus musculus]	Ybx3	mmR228	RFPPYHVGQTFDR	1.17413
Q99PP7	E3 ubiquitin-protein ligase TRIM33 isoform 1 [Mus musculus]	Trim33	mmR531	TPGQINLAQLR	1.17673
Q8BTJ4	ectonucleotide pyrophosphatase/phosphodiesterase family member 4 precursor [Mus musculus]	Enpp4	mmR439; dmR443	SRASTSRPFSR	1.18706
Q60668	heterogeneous nuclear ribonucleoprotein D0 isoform d [Mus musculus]; heterogeneous nuclear ribonucleoprotein D0 isoform a [Mus musculus]	Hnrnpd	dmR272	EQYQQQQQWGSRGGFAGR	1.19277
F6ZDS4	nuclear pore complex-associated protein Tpr [Mus musculus]	Tpr	mmR2231	TDGFAEAIHSPQVAGVPR	1.19335
P58854	gamma-tubulin complex component 3 [Mus musculus]	Tubgcp3	dmR200	QQLGPRLAWTLTGNQPSSQTPTSK	1.19366
Q80W00	serine/threonine-protein phosphatase 1 regulatory subunit 10 isoform 2 [Mus musculus]	Ppp1r10	dmR707; mmR710	GRGGRGGNEPPPPPPFR	1.19981
Q61466	SWI/SNF-related matrix-associated actin-dependent regulator of chromatin subfamily D member 1 [Mus musculus]	Smarcd1	dmR88	MTPQGPSMGPPGYGGNPSVRPGLAQSGMDQSR	1.21029
Q61466	SWI/SNF-related matrix-associated actin-dependent regulator of chromatin subfamily D member 1 [Mus musculus]	Smarcd1	mmR88; mmR100	MTPQGPSMGPPGYGGNPSVRPGLAQSGMDQSR	1.21357
Q6PDK2	histone-lysine N-methyltransferase MLL2 [Mus musculus]	Kmt2d	dmR3725	QLQLQQQRMQLAQK	1.21544
Q8BMB3	eukaryotic translation initiation factor 4E type 2 isoform 2 [Mus musculus]	Eif4e2	mmR241	LLFQNLWKPR	1.21868
Q8BH74	nuclear pore complex protein Nup107 [Mus musculus]	Nup107	dmR60	TPSSFRQPFVTPSSR	1.21986
Q8VEK3	heterogeneous nuclear ribonucleoprotein U [Mus musculus]	Hnrnpu	mmR709	RGNMPQRGGGGGSGGIGYPYPR	1.22881
Q9DAA6	exosome complex component CSL4 isoform 1 [Mus musculus]	Exosc1	dmR6	APPVRYCIPGER	1.23407
P47809	dual specificity mitogen-activated protein kinase kinase 4 [Mus musculus]	Map2k4	mmR56	STARFTLNPNTTGVQNPHIER	1.23801
Q3U0V1	far upstream element-binding protein 2 [Mus musculus]	Khsrp	mmR416	GRGQGNWGPPGGEMTFSIPTHK	1.26482
Q8BTI8	serine/arginine repetitive matrix protein 2 [Mus musculus]	Srrm2	dmR2345	MAPALSGANLTSPRVPLSAYDR	1.26815
Q8BTI8	serine/arginine repetitive matrix protein 2 [Mus musculus]	Srrm2	mmR2337; mmR2345	MAPALSGANLTSPRVPLSAYDR	1.27338
Q9QX47	protein SON [Mus musculus]	Son	dmR938	LGHDAYRLGQDPYR	1.2824
Q3U182	CREB-regulated transcription coactivator 2 [Mus musculus]	Crtc2	dmR161	GQLFRLPSALNR	1.30818
Q61545	RNA-binding protein EWS [Mus musculus]	Ewsr1	mmR614	RGGPGGPPGPLMEQMGGR	1.30912
Q8BTI8	serine/arginine repetitive matrix protein 2 [Mus musculus]	Srrm2	dmR2337	MAPALSGANLTSPRVPLSAYDR	1.3132
Q80TZ9	arginine-glutamic acid dipeptide repeats protein [Mus musculus]	Rere	dmR1370; dmR1379	ERLALAGPQLRPEMSYPDR	1.31629
Q3U0V1	far upstream element-binding protein 2 [Mus musculus]	Khsrp	mmR412; mmR414	SGPPGPPGAPGMPPGGRGR	1.33647
Q8BFW7	lipoma-preferred partner homolog isoform 1 [Mus musculus]	Lpp	mmR250	SAQPSPHYMAGPSSGQIYGPGPR	1.33805
Q8BFW7	lipoma-preferred partner homolog isoform 1 [Mus musculus]	Lpp	dmR219	SATKPQPAPQAAPIPVTPIGTLKPQPQPVPASYTTASTSSRPTFNVQVK	1.33823
Q8C9B9	death-inducer obliterator 1 isoform 3 [Mus musculus]	Dido1	mmR1848	GLSPSYLGGPRGGAPAQFEDR	1.33844
Q7TSC1	protein PRRC2A isoform 1 [Mus musculus]	Prrc2a	mmR2063	AELHPVELKPFQDYRK	1.35036
Q9JL19	nuclear receptor coactivator 6 isoform 1 [Mus musculus]	Ncoa6	dmR1099	QRMPMSVNTPMGSNSR	1.36516
Q8VIJ6	splicing factor, proline- and glutamine-rich [Mus musculus]	Sfpq	mmR685	FGQGGAGPVGGQGPRGMGPGTPAGYGR	1.37776
Q80TH2	protein LAP2 isoform 2 [Mus musculus]	Erbin	mmR1007; mmR1010	QNPQIDPVSFPPQRLPR	1.38709
Q8CIE2	zinc finger MIZ domain-containing protein 2 isoform 1 [Mus musculus]	Zmiz2	dmR262	LPQHGYPGPPQGQPLPRQGIK	1.38962
Q5I1X5	relA-associated inhibitor [Mus musculus]	Ppp1r13l	dmR399	AVLPGSPIFSRAPPPK	1.39051
A0A087WQ44	PREDICTED: LOW QUALITY PROTEIN: helicase SRCAP [Mus musculus]	Srcap	dmR1383	TPIPTPTLVRPLLK	1.39337
O70133	ATP-dependent RNA helicase A [Mus musculus]	Dhx9	mmR1361; dmR1372	RGYGGGYFGQGRGGGGGGGY	1.42134
P59759	MKL/myocardin-like protein 2 isoform 3 [Mus musculus]	Mkl2	dmR798	VFTNSAPNTVLQYQRQPGPTNQQPFVSK	1.42559
Q61602	transcriptional activator GLI3 [Mus musculus]	Gli3	dmR1023	VQRFSSLNSFNPPNLPPSVEK	1.433
Q8BRB7	histone acetyltransferase MYST4 [Mus musculus]	Kat6b	dmR1711	NMAASNIGISHSQRLQTQIASK	1.46408
Q8CBY0	gatC-like protein [Mus musculus]	Gatc	dmR41	VQAAGLGTQAPRLVPQGSGR	1.47768
Q9D011	TTD non-photosensitive 1 protein homolog [Mus musculus]	Mplkip	mmR58; dmR67; dmR76	ARPYGSSQSPRHGGNFSGARFGSPSPGGYPGSYSR	1.48221
Q03347	runt-related transcription factor 1 isoform 1 [Mus musculus]	Runx1	dmR223	VSPHHPAPTPNPRASLNHSTAFNPQPQSQMQDAR	1.48349
Q9D011	TTD non-photosensitive 1 protein homolog [Mus musculus]	Mplkip	dmR58; dmR67; mmR76	ARPYGSSQSPRHGGNFSGARFGSPSPGGYPGSYSR	1.48954
Q3TJD7	PDZ and LIM domain protein 7 isoform b [Mus musculus]	Pdlim7	dmR103	ALTPPADPPRYTFAPSASLNK	1.49555
A2AIV2	protein virilizer homolog [Mus musculus]	Kiaa1429	dmR1623; mmR1625	GRGRGGFGQGIRPHDIFR	1.49696
Q80W00	serine/threonine-protein phosphatase 1 regulatory subunit 10 isoform 2 [Mus musculus]	Ppp1r10	mmR693	GGPMRGGPGPAPGPYHR	1.50731
A2BH40	AT-rich interactive domain-containing protein 1A [Mus musculus]	Arid1a	mmR1277	AAGPGLGSVAMGPR	1.54212
Q80YR5	scaffold attachment factor B2 [Mus musculus]	Safb2	mmR939	GLAGGPGHGHVAAGRGGMAGQGSFAHGGHSQGYIVPSGR	1.54345
Q9Z138	tyrosine-protein kinase transmembrane receptor ROR2 precursor [Mus musculus]	Ror2	mmR785	SWGNLSNYNSSAQTSGASNTTQTSSLSTSPVSNVSNARYMAPK	1.55865
Q9QX47	protein SON [Mus musculus]	Son	dmR931	LGHDPYRLGHDAYR	1.57201
Q9WTQ5	A-kinase anchor protein 12 [Mus musculus]	Akap12	mmR1270; dmR1279	TADLTRDSEVMEVAR	1.57222
P26040	ezrin [Mus musculus]	Ezr	dmR293; dmR294	ILQLCMGNHELYMRR	1.60942
Q9QX47	protein SON [Mus musculus]	Son	dmR945	LGQDPYRLGHDPYR	1.64749
P49312	heterogeneous nuclear ribonucleoprotein A1 isoform b [Mus musculus]	Hnrnpa1	dmR218	GGGFGGNDNFGRGGNFSGR	1.65546
Q9R210	transcription factor EB isoform a [Mus musculus]	Tfeb	dmR8	IGLRMQLMR	1.68506
P61979	heterogeneous nuclear ribonucleoprotein K [Mus musculus]	Hnrnpk	mmR256	GRPVGFPMRGR	1.70548
Q80W00	serine/threonine-protein phosphatase 1 regulatory subunit 10 isoform 2 [Mus musculus]	Ppp1r10	mmR737	SGGGPPNGRGGPGGGGMVGGGGHRPHEGPGGSMGSGHR	1.70773
A2AWL7	MAX gene-associated protein isoform 1 [Mus musculus]	Mga	dmR1793	NPGSMVGIRLPAPCK	1.72076
Q6ZQF0	DNA topoisomerase 2-binding protein 1 [Mus musculus]	Topbp1	dmR812	GQDPTFPPVRQPLTK	1.72363
Q80XC3	USP6 N-terminal-like protein isoform a [Mus musculus]	Usp6nl	dmR657	HVPTAHSGFVSTQISPRPQINPSR	1.74074
Q80XC3	USP6 N-terminal-like protein isoform a [Mus musculus]	Usp6nl	dmR650	HVPTAHSGFVSTQISPRPQINPSR	1.74074
Q3U7U3	F-box only protein 7 [Mus musculus]	Fbxo7	dmR519	SADSRLPFL	1.7517
Q9D0E1	heterogeneous nuclear ribonucleoprotein M isoform a [Mus musculus]	Hnrnpm	mmR495	MGAGMGFGLER	1.79537
Q02384	son of sevenless homolog 2 [Mus musculus]	Sos2	dmR1322	ELSHPPLYRLPLLENAETPQ	1.80105
Q64092	transcription factor E3 isoform a [Mus musculus]	Tfe3	dmR187	VQTHLENPTRYHLQQAR	1.8028
Q9QXA5	U6 snRNA-associated Sm-like protein LSm4 [Mus musculus]	Lsm4	dmR100; mmR107; mmR113	GRGMGGAGRGVFGGR	1.81086
Q8K4P0	WD repeat domain 33 isoform 1 [Mus musculus]	Wdr33	mmR1309	SGSNWGRGSNMNSGPPR	1.84298
P49312	heterogeneous nuclear ribonucleoprotein A1 isoform b [Mus musculus]; heterogeneous nuclear ribonucleoprotein A1 isoform a [Mus musculus]	Hnrnpa1	mmR218; mmR225	GGGFGGNDNFGRGGNFSGR	1.93147
Q9WU56	tRNA pseudouridine synthase A, mitochondrial isoform 1 [Mus musculus]	Pus1	mmR137	TIEDDLVSALVQAGCIPENHGTDMRKMSFQR	1.93415
Q3TJD7	PDZ and LIM domain protein 7 isoform b [Mus musculus]	Pdlim7	dmR137	QNGQLLRQPVPDASK	1.94155
Q8CAY6	acetyl-Coenzyme A acetyltransferase 3 [Mus musculus]	Acat2	mmR210	AGHFDKEIVPVLVSSR	1.94498
Q60865	caprin-1 isoform a [Mus musculus]	Caprin1	dmR665	DYSGYQRDGYQQNFK	1.96441
Q80TV8	CLIP-associating protein 1 isoform 1 [Mus musculus]	Clasp1	mmR742; dmR751; mmR755	IPRPSMSQGCSRDTSR	1.97917
O88569	heterogeneous nuclear ribonucleoproteins A2/B1 isoform 1 [Mus musculus]	Hnrnpa2b1	mmR238; mmR266	GGSDGYGSGRGFGDGYNGYGGGPGGGNFGGSPGYGGGR	2.0124
Q00PI9	heterogeneous nuclear ribonucleoprotein U-like protein 2 [Mus musculus]	Hnrnpul2	mmR686	AYGQQYWGQSGNRGGYR	2.28667
Q60668	heterogeneous nuclear ribonucleoprotein D0 isoform d [Mus musculus]; heterogeneous nuclear ribonucleoprotein D0 isoform a [Mus musculus]	Hnrnpd	dmR278	EQYQQQQQWGSRGGFAGR	2.32167
Q61545	RNA-binding protein EWS [Mus musculus]	Ewsr1	dmR463; dmR470	EGRGMPPPLRGGPGGPGGPGGPMGR	2.35293
Q8VIJ6	splicing factor, proline- and glutamine-rich [Mus musculus]	Sfpq	dmR7; dmR9	FRSRGGGGGGFHR	2.38994
Q60668	heterogeneous nuclear ribonucleoprotein D0 isoform a [Mus musculus]	Hnrnpd	mmR272; mmR278	EQYQQQQQWGSRGGFAGR	2.40218
Q5PRE5	hypothetical protein LOC212127 [Mus musculus]	Proser1	dmR613	GPAHPGTPVRGTLGLSGALGR	2.41663
P70333	heterogeneous nuclear ribonucleoprotein H2 [Mus musculus]	Hnrnph2	mmR259	GAYGGGYGGYDDYGGYNDGYGFGSDRFGR	2.43228
A2AIV2	protein virilizer homolog [Mus musculus]	Kiaa1429	dmR1774	GRGGLGPSWASTNSGSGGSR	2.43303
E9PYK3	poly (ADP-ribose) polymerase family, member 4 [Mus musculus]	Parp4	dmR1298	TAVAQSPATAQSLNFHLPLSVRPQLK	2.43897
Q8BZ32	putative Polycomb group protein ASXL2 [Mus musculus]	Asxl2	dmR594; dmR604	ARFPISITSPYRTGAR	2.45691
Q8BG05	heterogeneous nuclear ribonucleoprotein A3 isoform a [Mus musculus]	Hnrnpa3	mmR286	GSYGGGDGGYNGFGGDGGNYGGGPGYSSR	2.50931
O88569	heterogeneous nuclear ribonucleoproteins A2/B1 isoform 2 [Mus musculus]	Hnrnpa2b1	dmR213	SGRGGNFGFGDSRGGGGNFGPGPGSNFR	2.52521
Q61545	RNA-binding protein EWS [Mus musculus]	Ewsr1	mmR580	GGLMDRGGPGGMFR	2.56163
Q61466	SWI/SNF-related matrix-associated actin-dependent regulator of chromatin subfamily D member 1 [Mus musculus]	Smarcd1	dmR100	MTPQGPSMGPPGYGGNPSVRPGLAQSGMDQSR	2.56345
Q9D7N9	adipocyte plasma membrane-associated protein [Mus musculus]	Apmap	dmR342	RMIFKMFSQETVMK	2.58508
Q9WUU9	80 kDa MCM3-associated protein [Mus musculus]	Mcm3ap	mmR458	VQRVFTR	2.64607
P29341	polyadenylate-binding protein 1 [Mus musculus]	Pabpc1	mmR493; mmR506	VANTSTQTMGPRPAAAAAAATPAVR	2.66317
Q569Z6	thyroid hormone receptor-associated protein 3 [Mus musculus]	Thrap3	mmR841	GWGRGNYSGNNNNNSNNDFQK	2.68597
Q8BPI1	protein kintoun [Mus musculus]	Dnaaf2	mmR160	FREMLDATALEAVEQQFGVR	2.72355
Q9CY57	Friend of PRMT1 protein [Mus musculus]	Chtop	dmR98; mmR104	LGRPIGALARGAIGGR	2.76156
Q8VEK3	heterogeneous nuclear ribonucleoprotein U [Mus musculus]	Hnrnpu	dmR715	GNMPQRGGGGGSGGIGYPYPR	2.86463
Q61545	RNA-binding protein EWS [Mus musculus]	Ewsr1	mmR493; mmR499; mmR502	GGDRGGFPPRGPR	3.07755
Q8K4P0	WD repeat domain 33 isoform 1 [Mus musculus]	Wdr33	dmR1302; mmR1309	GARSGSNWGRGSNMNSGPPR	3.242
P61979	heterogeneous nuclear ribonucleoprotein K [Mus musculus]	Hnrnpk	dmR256	GRPVGFPMRGR	3.32009
Q7TSC1	protein PRRC2A isoform 1 [Mus musculus]	Prrc2a	mmR1171	GRGGGRPPPVCSGWSPPAK	3.39381
Q8VEK3	heterogeneous nuclear ribonucleoprotein U [Mus musculus]	Hnrnpu	mmR709; mmR715	RGNMPQRGGGGGSGGIGYPYPR	3.55586
Q80VD1	family with sequence similarity 98, member B [Mus musculus]	Fam98b	dmR351; mmR380; mmR386	GGGGGGRGGWGGGGGWGGGGGSGGGWGGSGGGGGGRGGFQGR	3.81012
Q60865	caprin-1 isoform a [Mus musculus]	Caprin1	dmR617	GARGLMNGYR	3.91278
Q8VEK3	heterogeneous nuclear ribonucleoprotein U [Mus musculus]	Hnrnpu	mmR709; dmR715	RGNMPQRGGGGGSGGIGYPYPR	4.01774
Q8CBY0	gatC-like protein [Mus musculus]	Gatc	dmR9; dmR11	AASVRFRAPLDAGR	4.08738
O88569	heterogeneous nuclear ribonucleoproteins A2/B1 isoform 1 [Mus musculus]	Hnrnpa2b1	mmR238	GGSDGYGSGRGFGDGYNGYGGGPGGGNFGGSPGYGGGR	4.08919
Q8VEK3	heterogeneous nuclear ribonucleoprotein U [Mus musculus]	Hnrnpu	dmR709; mmR715	RGNMPQRGGGGGSGGIGYPYPR	4.15645
Q61545	RNA-binding protein EWS [Mus musculus]	Ewsr1	mmR454	KKPPMNSMRGGMPPR	4.3976
Q8BG05	heterogeneous nuclear ribonucleoprotein A3 isoform a [Mus musculus]	Hnrnpa3	dmR216; dmR226	GRGGGSGNFMGRGGNFGGGGGNFGR	4.66219
Q4VGL6	roquin [Mus musculus]	Rc3h1	dmR739	DPPYSRLPPPQPHPSLDELHR	4.71512
O88587	catechol O-methyltransferase [Mus musculus]	Comt	dmR128	LLPPGARLLTMEINPDYAAITQQMLDFAGLQDK	4.86313
Q9CY58	plasminogen activator inhibitor 1 RNA-binding protein isoform 1 [Mus musculus]	Serbp1	mmR363; mmR366	KPANDITSQLEINFGDLGRPGRGGR	4.97415
Q9D773	39S ribosomal protein L2, mitochondrial precursor [Mus musculus]	Mrpl2	dmR23	SLSLASAAITAR	5.32571
Q80VD1	family with sequence similarity 98, member B [Mus musculus]	Fam98b	dmR410	GGYGGRGGYGGRGYGDPYGGGGGGGGGYR; GGYGGRGYGDPYGGGGGGGGGYR	5.32777
Q8BG05	heterogeneous nuclear ribonucleoprotein A3 isoform a [Mus musculus]	Hnrnpa3	dmR216	GRGGGSGNFMGRGGNFGGGGGNFGR	5.5573
Q9Z1A1	protein TFG [Mus musculus]	Tfg	mmR382	NRPPFGQGYAQPGPGYR	5.64109
Q80UY2	E3 ubiquitin-protein ligase KCMF1 [Mus musculus]	Kcmf1	mmR159; mmR165	MFHPGRGLGGPR	5.7593
P49312	heterogeneous nuclear ribonucleoprotein A1 isoform b [Mus musculus]	Hnrnpa1	mmR196; mmR206	GRSGSGNFGGGRGGGFGGNDNFGR	5.75969
Q6A0A9	constitutive coactivator of PPAR-gamma-like protein 1 [Mus musculus]	FAM120A	mmR962; mmR965	GRGGRGPFPLQVVSVGGPAR	5.98243
E9PZM7	splicing factor, arginine/serine-rich 2, interacting protein [Mus musculus]	Scaf11	mmR1096	NFGPGWMSSR	6.14874
P56959	RNA-binding protein FUS [Mus musculus]	Fus	mmR387; mmR400	GGPMGRGGYGGGGSGGGGRGGFPSGGGGGGGQQR	6.18036
Q9CY57	Friend of PRMT1 protein [Mus musculus]	Chtop	mmR129	TLLRGGMSLR	6.21968
Q8BG05	heterogeneous nuclear ribonucleoprotein A3 isoform a [Mus musculus]	Hnrnpa3	mmR239; mmR246	GGNFGGGGGNFGRGGNFGGRGGYGGGGGGSR; GGNFGGGGGNFGRGGNFGGR	6.27038
Q8VEK3	heterogeneous nuclear ribonucleoprotein U [Mus musculus]	Hnrnpu	dmR737; mmR743	GPVFPGRGGYSNR	6.33895
Q9DBR4	amyloid beta A4 precursor protein-binding family B member 2 [Mus musculus]	Apbb2	mmR733	VRPPPPPADSVTR	6.45403
Q80UY2	E3 ubiquitin-protein ligase KCMF1 [Mus musculus]	Kcmf1	mmR159	MFHPGRGLGGPR	6.55293
Q8VEK3	heterogeneous nuclear ribonucleoprotein U [Mus musculus]	Hnrnpu	mmR685; dmR691	GRGGFNMRGGNFR	6.6644
Q8VHM5	heterogeneous nuclear ribonucleoprotein R [Mus musculus]	Hnrnpr	dmR525; mmR531	GRAGYSQRGAPLGPPR	6.881
Q61545	RNA-binding protein EWS [Mus musculus]	Ewsr1	dmR493; dmR502	GGDRGGFPPRGPR	6.90599
P50544	very long-chain specific acyl-CoA dehydrogenase, mitochondrial precursor [Mus musculus]	Acadvl	dmR588	ASRSLSEGYPTAQHEK	6.98957
P61979	heterogeneous nuclear ribonucleoprotein K [Mus musculus]	Hnrnpk	mmR256; mmR258	GRPVGFPMRGR	7.13521
Q00PI9	heterogeneous nuclear ribonucleoprotein U-like protein 2 [Mus musculus]	Hnrnpul2	mmR682	AYGQQYWGQSGNRGGYR	7.43852
Q8BG05	heterogeneous nuclear ribonucleoprotein A3 isoform a [Mus musculus]	Hnrnpa3	dmR216; mmR226; mmR239	GRGGGSGNFMGRGGNFGGGGGNFGR	7.70233
P09405	nucleolin [Mus musculus]	Ncl	dmR678; dmR684	GRGGFGGRGGFR	7.72802
E9Q414	apolipoprotein B precursor [Mus musculus]	Apob	mmR960	TEVIPPLVENR	7.88236
Q8BG05	heterogeneous nuclear ribonucleoprotein A3 isoform a [Mus musculus]	Hnrnpa3	mmR239; dmR246; mmR257	GGNFGGGGGNFGRGGNFGGRGGYGGGGGGSR	7.89155
Q80VD1	family with sequence similarity 98, member B [Mus musculus]	Fam98b	mmR404; dmR410	GGYGGRGGYGGRGYGDPYGGGGGGGGGYR	7.9479
Q8VEK3	heterogeneous nuclear ribonucleoprotein U [Mus musculus]	Hnrnpu	dmR709	RGNMPQRGGGGGSGGIGYPYPR	8.19254
Q8VEK3	heterogeneous nuclear ribonucleoprotein U [Mus musculus]	Hnrnpu	dmR691	GGFNMRGGNFR	8.2292
Q9CPQ5	centromere protein Q [Mus musculus]	Cenpq	mmR8	MKMSGKAR	8.56999
Q9Z1J2	serine/threonine-protein kinase Nek4 [Mus musculus]	Nek4	mmR764	EARLQEHMGDK	8.84482
P49312	heterogeneous nuclear ribonucleoprotein A1 isoform b [Mus musculus]; heterogeneous nuclear ribonucleoprotein A1 isoform a [Mus musculus]	Hnrnpa1	mmR206; mmR218	SGSGNFGGGRGGGFGGNDNFGR; SGSGNFGGGRGGGFGGNDNFGRGGNFSGR	9.15824
Q8BG05	heterogeneous nuclear ribonucleoprotein A3 isoform a [Mus musculus]	Hnrnpa3	dmR216; dmR226; mmR239	GRGGGSGNFMGRGGNFGGGGGNFGR	9.40665
Q8VHM5	heterogeneous nuclear ribonucleoprotein R [Mus musculus]	Hnrnpr	mmR501	GGYEDPYYGYDDGYAVRGR	9.59855
Q8VEK3	heterogeneous nuclear ribonucleoprotein U [Mus musculus]	Hnrnpu	dmR685; mmR691	GRGGFNMRGGNFR	9.69553
Q8VEK3	heterogeneous nuclear ribonucleoprotein U [Mus musculus]	Hnrnpu	mmR685; mmR691	GRGGFNMRGGNFR	9.71857
Q640M1	U3 small nucleolar RNA-associated protein 14 homolog A [Mus musculus]	Utp14a	mmR320	AIMAKYDLEAR	10.5086
P09405	nucleolin [Mus musculus]	Ncl	mmR691	GGRGGGGDFKPQGK	10.6514
A2AIV2	protein virilizer homolog [Mus musculus]	Kiaa1429	mmR1623; mmR1625	GRGRGGFGQGIRPHDIFR	10.8266
Q8VHM5	heterogeneous nuclear ribonucleoprotein R [Mus musculus]	Hnrnpr	dmR531	AGYSQRGAPLGPPR	11.0402
Q569Z6	thyroid hormone receptor-associated protein 3 [Mus musculus]	Thrap3	dmR837	GRGWGRGNYSGNNNNNSNNDFQK	11.7189
P56959	RNA-binding protein FUS [Mus musculus]	Fus	dmR387; mmR400	GGPMGRGGYGGGGSGGGGRGGFPSGGGGGGGQQR	11.9604
P49312	heterogeneous nuclear ribonucleoprotein A1 isoform b [Mus musculus]	Hnrnpa1	mmR206; mmR225	SGSGNFGGGRGGGFGGNDNFGRGGNFSGR	12.374
Q60749	KH domain-containing, RNA-binding, signal transduction-associated protein 1 [Mus musculus]	Khdrbs1	mmR291	GRGAAPPPPPVPR	12.6683
Q8BMC4	pumilio domain-containing protein C14orf21 homolog [Mus musculus]	Nop9	mmR12; dmR13; dmR20	ARRQFSGAGR	12.9232
Q8BG05	heterogeneous nuclear ribonucleoprotein A3 isoform a [Mus musculus]	Hnrnpa3	mmR226; mmR239	GGGSGNFMGRGGNFGGGGGNFGRGGNFGGR; GGGSGNFMGRGGNFGGGGGNFGR	14.0201
P09405	nucleolin [Mus musculus]	Ncl	mmR678; mmR688	GRGGFGGRGGFR	14.0991
Q80VD1	family with sequence similarity 98, member B [Mus musculus]	Fam98b	mmR404; mmR410	GGYGGRGGYGGRGYGDPYGGGGGGGGGYR	14.378
Q61464	zinc finger protein 638 isoform 1 [Mus musculus]	Znf638	dmR54; dmR68	GIPHRFPGHGSYQNMGPQRMNVQVTQHR	14.6827
Q8VEK3	heterogeneous nuclear ribonucleoprotein U [Mus musculus]	Hnrnpu	mmR737; mmR743	GPVFPGRGGYSNR	14.6894
Q80VD1	family with sequence similarity 98, member B [Mus musculus]	Fam98b	mmR380	GGWGGGGGWGGGGGSGGGWGGSGGGGGGRGGFQGR	15.0092
E9PWR4	disco-interacting protein 2 homolog C [Mus musculus]	Dip2c	dmR4; dmR16; mmR18	MADRSLEGMALPLEVRAR	15.13
Q8BG05	heterogeneous nuclear ribonucleoprotein A3 isoform a [Mus musculus]	Hnrnpa3	mmR216; dmR226	GRGGGSGNFMGRGGNFGGGGGNFGR	16.2748
Q569Z6	thyroid hormone receptor-associated protein 3 [Mus musculus]	Thrap3	mmR101	GFYPWGQYNRGGYGNYR	16.6486
Q9Z1A1	protein TFG [Mus musculus]	Tfg	dmR382	NRPPFGQGYAQPGPGYR	17.546
Q8VEK3	heterogeneous nuclear ribonucleoprotein U [Mus musculus]	Hnrnpu	mmR715	GNMPQRGGGGGSGGIGYPYPR; RGNMPQRGGGGGSGGIGYPYPR	17.9732
P70227	inositol 1,4,5-trisphosphate receptor type 3 [Mus musculus]	Itpr3	mmR2470; mmR2480	ACDTLLMCIVTVMNHGLRNGGGVGDILR	18.6763
P61979	heterogeneous nuclear ribonucleoprotein K [Mus musculus]	Hnrnpk	mmR296; mmR299	RGPPPPPPGRGGR	18.7555
Q8BG05	heterogeneous nuclear ribonucleoprotein A3 isoform a [Mus musculus]	Hnrnpa3	mmR216; mmR226	GRGGGSGNFMGRGGNFGGGGGNFGR	19.4302
Q8BG05	heterogeneous nuclear ribonucleoprotein A3 isoform a [Mus musculus]	Hnrnpa3	dmR216; mmR226	GRGGGSGNFMGRGGNFGGGGGNFGR	19.4345
P49312	heterogeneous nuclear ribonucleoprotein A1 isoform b [Mus musculus]; heterogeneous nuclear ribonucleoprotein A1 isoform a [Mus musculus]	Hnrnpa1	mmR206	SGSGNFGGGRGGGFGGNDNFGR	20.1544
P61979	heterogeneous nuclear ribonucleoprotein K [Mus musculus]	Hnrnpk	dmR299	RGPPPPPPGRGGR	20.8518
Q8VHM5	heterogeneous nuclear ribonucleoprotein R [Mus musculus]	Hnrnpr	dmR499; mmR501	GGYEDPYYGYDDGYAVRGR	21.159
P49312	heterogeneous nuclear ribonucleoprotein A1 isoform b [Mus musculus]; heterogeneous nuclear ribonucleoprotein A1 isoform a [Mus musculus]	Hnrnpa1	mmR218	GGGFGGNDNFGRGGNFSGR; SGSGNFGGGRGGGFGGNDNFGR	21.6711
Q8BG05	heterogeneous nuclear ribonucleoprotein A3 isoform a [Mus musculus]	Hnrnpa3	mmR226	GGGSGNFMGRGGNFGGGGGNFGR	23.4287
O70133	ATP-dependent RNA helicase A [Mus musculus]	Dhx9	mmR1372	GYGGGYFGQGRGGGGGGGY; RGYGGGYFGQGRGGGGGGGY	24.6634
P56959	RNA-binding protein FUS [Mus musculus]	Fus	mmR219	GRGGGGGYNR	24.7397
Q8BG05	heterogeneous nuclear ribonucleoprotein A3 isoform a [Mus musculus]	Hnrnpa3	mmR216; mmR226; mmR239	GRGGGSGNFMGRGGNFGGGGGNFGR	24.7943
Q9CY58	plasminogen activator inhibitor 1 RNA-binding protein isoform 3 [Mus musculus]	Serbp1	mmR369	KPANDITSQLEINFGDLGRPGRGGR	25.264
Q9CY58	plasminogen activator inhibitor 1 RNA-binding protein isoform 1 [Mus musculus]; plasminogen activator inhibitor 1 RNA-binding protein isoform 3 [Mus musculus]	Serbp1	mmR363	KPANDITSQLEINFGDLGRPGRGGR; KPANDITSQLEINFGDLGRPGR	25.6335
Q9CY58	plasminogen activator inhibitor 1 RNA-binding protein isoform 1 [Mus musculus]; plasminogen activator inhibitor 1 RNA-binding protein isoform 3 [Mus musculus]	Serbp1	mmR366	KPANDITSQLEINFGDLGRPGRGGR	26.1102
A2AIV2	protein virilizer homolog [Mus musculus]	Kiaa1429	mmR1774	GRGGLGPSWASTNSGSGGSR	26.1564
Q80VD1	family with sequence similarity 98, member B [Mus musculus]	Fam98b	mmR410	GGYGGRGYGDPYGGGGGGGGGYR	27.2483
Q7TMK9	heterogeneous nuclear ribonucleoprotein Q isoform 2 [Mus musculus]; heterogeneous nuclear ribonucleoprotein Q isoform 1 [Mus musculus]	Syncrip	mmR496	GGYEDPYYGYEDFQVGAR	27.2864
Q9CX86	heterogeneous nuclear ribonucleoprotein A0 [Mus musculus]	Hnrnpa0	mmR293	SNSGPYRGGYGGGYGGGSF	27.5522
Q8VEK3	heterogeneous nuclear ribonucleoprotein U [Mus musculus]	Hnrnpu	mmR691	GGFNMRGGNFR	28.1037
Q569Z6	thyroid hormone receptor-associated protein 3 [Mus musculus]	Thrap3	mmR837; mmR841	GRGWGRGNYSGNNNNNSNNDFQK	32.4311
Q8VHM5	heterogeneous nuclear ribonucleoprotein R [Mus musculus]	Hnrnpr	mmR499	GGYEDPYYGYDDGYAVR; GGYEDPYYGYDDGYAVRGR	34.527
Q6ZPY2	protein SMG5 [Mus musculus]	Smg5	mmR183; dmR199	CLVYLGDLSRYQNELAGVDTELLAER	38.1679
Q6ZPZ3	zinc finger CCCH domain-containing protein 4 [Mus musculus]	Zc3h4	dmR268; mmR270	GRGRGSMGEHPEDEEDLYEEEIEYGESEEPMGDDDYDDYSK	38.8436
Q569Z6	thyroid hormone receptor-associated protein 3 [Mus musculus]	Thrap3	dmR837; mmR841	GRGWGRGNYSGNNNNNSNNDFQK	44.734
Q8VHM5	heterogeneous nuclear ribonucleoprotein R [Mus musculus]	Hnrnpr	mmR499; mmR501	GGYEDPYYGYDDGYAVRGR	45.9407
P49312	heterogeneous nuclear ribonucleoprotein A1 isoform b [Mus musculus]; heterogeneous nuclear ribonucleoprotein A1 isoform a [Mus musculus]	Hnrnpa1	mmR225	GGGFGGNDNFGRGGNFSGR; GGNFSGRGGFGGSR	51.6493
Q8BG05	heterogeneous nuclear ribonucleoprotein A3 isoform a [Mus musculus]	Hnrnpa3	mmR239; dmR257	GGNFGGGGGNFGRGGNFGGRGGYGGGGGGSR	52.2611
Q8VEK3	heterogeneous nuclear ribonucleoprotein U [Mus musculus]	Hnrnpu	dmR685; dmR691	GRGGFNMRGGNFR	54.3388
P56959	RNA-binding protein FUS [Mus musculus]	Fus	mmR400	GGYGGGGSGGGGRGGFPSGGGGGGGQQR	55.4314
Q8VEK3	heterogeneous nuclear ribonucleoprotein U [Mus musculus]	Hnrnpu	dmR737	GPVFPGRGGYSNR	65.2569
Q8BG05	heterogeneous nuclear ribonucleoprotein A3 isoform a [Mus musculus]	Hnrnpa3	mmR239; dmR246	GGNFGGGGGNFGRGGNFGGRGGYGGGGGGSR	75.0081
Q8VHM5	heterogeneous nuclear ribonucleoprotein R [Mus musculus]	Hnrnpr	dmR501	GGYEDPYYGYDDGYAVRGR	84.0462
Q8BG05	heterogeneous nuclear ribonucleoprotein A3 isoform a [Mus musculus]	Hnrnpa3	dmR239; mmR246	GGNFGGGGGNFGRGGNFGGRGGYGGGGGGSR; GGNFGGGGGNFGRGGNFGGR	93.275
Q8VEK3	heterogeneous nuclear ribonucleoprotein U [Mus musculus]	Hnrnpu	mmR737	GPVFPGRGGYSNR	97.861
Q8BG05	heterogeneous nuclear ribonucleoprotein A3 isoform a [Mus musculus]	Hnrnpa3	mmR239	GGNFGGGGGNFGRGGNFGGR	123.736
Q8BG05	heterogeneous nuclear ribonucleoprotein A3 isoform a [Mus musculus]	Hnrnpa3	mmR246	GGNFGGGGGNFGRGGNFGGR; GGNFGGRGGYGGGGGGSR	295.237

## Sheet: sdmR IAP
Accession	Protein Descriptions	Gene Symbol	Sites	Peptides	Ratio (Prmt1KD/ControlKD)
Q0P678	zinc finger CCCH domain-containing protein 18 isoform b [Mus musculus]	Zc3h18	mmR868; dmR870	MGSPKPERQR	0.00605411
Q61545	RNA-binding protein EWS [Mus musculus]	Ewsr1	mmR463; dmR470	EGRGMPPPLRGGPGGPGGPGGPMGR	0.00946411
Q60668	heterogeneous nuclear ribonucleoprotein D0 isoform a [Mus musculus]	Hnrnpd	mmR272; dmR278	EQYQQQQQWGSRGGFAGR	0.0100966
O35737	heterogeneous nuclear ribonucleoprotein H [Mus musculus]	Hnrnph1	dmR233	RGAYGGGYGGYDDYNGYNDGYGFGSDRFGR; RGAYGGGYGGYDDYNGYNDGYGFGSDR	0.0109398
Q8BG26	RUN and SH3 domain-containing protein 1 isoform 2 [Mus musculus]	Rusc1	dmR380; dmR392; dmR401	AQPPPVPPRDPPAGWALVPPRPPPPPVPPR	0.0119522
Q61545	RNA-binding protein EWS [Mus musculus]	Ewsr1	dmR463; dmR470	EGRGMPPPLRGGPGGPGGPGGPMGR	0.0149975
P26638	seryl-tRNA synthetase, cytoplasmic isoform 1 [Mus musculus]	Sars	dmR157	EIGNLLHPSVPISNDEDADNKVER	0.0199119
O35737	heterogeneous nuclear ribonucleoprotein H [Mus musculus]	Hnrnph1	mmR233	RGAYGGGYGGYDDYNGYNDGYGFGSDR; RGAYGGGYGGYDDYNGYNDGYGFGSDRFGR	0.0201465
Q8K4P0	WD repeat domain 33 isoform 1 [Mus musculus]	Wdr33	mmR1028	LREFEGRGGPLPQEEK	0.0257222
Q6PIX5	inactive rhomboid protein 1 [Mus musculus]	Rhbdf1	dmR14	MSEARRDSTSSLQR	0.0271046
Q9JJA9	general receptor for phosphoinositides 1-associated scaffold protein [Mus musculus]	Grasp	mmR24	EEATAAPDPAGR	0.0280445
Q9JLV5	cullin-3 [Mus musculus]	Cul3	dmR171	QTLLDMIAR	0.0307996
Q60668	heterogeneous nuclear ribonucleoprotein D0 isoform a [Mus musculus]; heterogeneous nuclear ribonucleoprotein D0 isoform c [Mus musculus]	Hnrnpd	dmR272	EQYQQQQQWGSRGGFAGR	0.0337044
Q9JKB3	DNA-binding protein A long isoform [Mus musculus]	Ybx3	mmR212; mmR216	NYAGEEEEEGSGSSEGFEPPAADGQFSGARNQLR	0.0343143
Q9JKB3	DNA-binding protein A long isoform [Mus musculus]	Ybx3	dmR216	NYAGEEEEEGSGSSEGFEPPAADGQFSGARNQLR	0.0343143
E9PYH6	SET domain containing 1A [Mus musculus]	Setd1a	dmR1540	QLEGGDTQGTNRVLSER	0.0388426
A2A6A1	G patch domain containing 8 [Mus musculus]	Gpatch8	mmR83; dmR97; mmR98	YDVMGMGRMEMELDYAEDATERR	0.039208
P42932	T-complex protein 1 subunit theta [Mus musculus]	Cct8	mmR155	NLRDVDEVSSLLR	0.0399795
A2AKB9	DDB1- and CUL4-associated factor 10 [Mus musculus]	Dcaf10	dmR390; mmR394	HMSRASQREGVSPR	0.041503
Q60865	caprin-1 isoform a [Mus musculus]	Caprin1	mmR163	LKTVLELQYVLDKLGDDDVR; TVLELQYVLDKLGDDDVR; TVLELQYVLDKLGDDDVRTDLK	0.0428821
Q3U0V1	far upstream element-binding protein 2 [Mus musculus]	Khsrp	mmR412; dmR414	SGPPGPPGAPGMPPGGRGRGR	0.0434304
Q3TLH4	protein PRRC2C [Mus musculus]	Prrc2c	mmR1150	DRDWFPDQGYR	0.0462299
P27790	major centromere autoantigen B [Mus musculus]	Cenpb	dmR284	ALDTRMAAESRR	0.0481587
O88569	heterogeneous nuclear ribonucleoproteins A2/B1 isoform 2 [Mus musculus]; heterogeneous nuclear ribonucleoproteins A2/B1 isoform 1 [Mus musculus]	Hnrnpa2b1	mmR213	GGNFGFGDSRGGGGNFGPGPGSNFR	0.0519561
P61458	pterin-4-alpha-carbinolamine dehydratase [Mus musculus]	Pcbd1	mmR31	AVGWNEVEGR	0.0541694
Q8BGW1	alpha-ketoglutarate-dependent dioxygenase FTO [Mus musculus]	Fto	mmR416	KMESMTNAVLR	0.0544511
P10126	elongation factor 1-alpha 1 [Mus musculus]	Eef1a1	dmR166	MDSTEPPYSQKRYEEIVK	0.0547
Q9JKB3	DNA-binding protein A long isoform [Mus musculus]	Ybx3	dmR212	NYAGEEEEEGSGSSEGFEPPAADGQFSGARNQLR	0.0578937
Q8C7E9	cleavage stimulation factor subunit 2 tau variant [Mus musculus]	Cstf2t	mmR13	SSLAVRDPAMDR	0.0585897
Q61696	heat shock 70 kDa protein 1B [Mus musculus]	Hspa1a	mmR469	FELSGIPPAPR	0.0625988
Q9QXV1	chromobox protein homolog 8 [Mus musculus]	Cbx8	dmR295; dmR303; mmR309	HSSGTPASVGSLYRDMGAQGGRPSLIAR	0.0704402
P70333	heterogeneous nuclear ribonucleoprotein H2 [Mus musculus]	Hnrnph2	dmR233	RGAYGGGYGGYDDYGGYNDGYGFGSDR	0.0777369
Q00PI9	heterogeneous nuclear ribonucleoprotein U-like protein 2 [Mus musculus]	Hnrnpul2	mmR682; mmR686	AYGQQYWGQSGNRGGYR	0.0810726
P70333	heterogeneous nuclear ribonucleoprotein H2 [Mus musculus]	Hnrnph2	mmR233	RGAYGGGYGGYDDYGGYNDGYGFGSDR	0.0814197
Q5SV80	myosin-XIX [Mus musculus]	Myo19	mmR376	RDCLAKLIYAR	0.084617
F8VQB6	myosin X [Mus musculus]	Myo10	dmR737; mmR738	RREEEIDR	0.0849561
P14115	60S ribosomal protein L27a [Mus musculus]	Rpl27a	mmR32	KHPGGRGNAGGMHHHR	0.0876535
Q61545	RNA-binding protein EWS [Mus musculus]	Ewsr1	dmR463; mmR470	EGRGMPPPLRGGPGGPGGPGGPMGR	0.0925669
Q8C804	spindle and centriole-associated protein 1 [Mus musculus]	Spice1	dmR560; dmR565	RTVQTRPAPR	0.0933751
Q9CY58	plasminogen activator inhibitor 1 RNA-binding protein isoform 1 [Mus musculus]	Serbp1	dmR216	RGGSGSHNWGTVKDELTESPK	0.0958648
Q8K4P0	WD repeat domain 33 isoform 1 [Mus musculus]	Wdr33	dmR16	FFHMPRFQHQAPR	0.096742
P52734	FYVE, RhoGEF and PH domain-containing protein 1 [Mus musculus]	Fgd1	mmR442	RMEEWDR	0.0986626
Q61545	RNA-binding protein EWS [Mus musculus]	Ewsr1	dmR463; dmR470; mmR485	EGRGMPPPLRGGPGGPGGPGGPMGR	0.0991927
Q60749	KH domain-containing, RNA-binding, signal transduction-associated protein 1 [Mus musculus]	Khdrbs1	dmR304; dmR310; dmR315	GRGVGPPRGALVR	0.0999034
Q9CY58	plasminogen activator inhibitor 1 RNA-binding protein isoform 1 [Mus musculus]	Serbp1	mmR216	RGGSGSHNWGTVKDELTESPK	0.109975
P98083	SHC-transforming protein 1 isoform a [Mus musculus]	Shc1	mmR120	DSGLLPLLQDMNKLSGGGGR	0.110659
O88291	zinc finger protein 326 [Mus musculus]	Znf326	mmR173	ENYSSYSSFSSPHMKPAPVGSR	0.111229
Q61545	RNA-binding protein EWS [Mus musculus]	Ewsr1	dmR614	RGGPGGPPGPLMEQMGGR	0.11346
Q61545	RNA-binding protein EWS [Mus musculus]	Ewsr1	dmR470	GMPPPLRGGPGGPGGPGGPMGR	0.116735
O88569	heterogeneous nuclear ribonucleoproteins A2/B1 isoform 2 [Mus musculus]	Hnrnpa2b1	mmR228	GGGGNFGPGPGSNFRGGSDGYGSGR	0.117617
Q62384	zinc finger protein ZPR1 [Mus musculus]	Zpr1	mmR152	GALTTVEGLISR	0.121463
Q8CHH9	septin-8 [Mus musculus]	Sept8	dmR149	SLFDYHDTRIHVCLYFITPTGHSLK	0.123957
Q8CAY6	acetyl-Coenzyme A acetyltransferase 3 [Mus musculus]	Acat2	mmR210	AGHFDKEIVPVLVSSR	0.125369
P48722	heat shock 70 kDa protein 4L [Mus musculus]	Hspa4l	mmR632	NAVEEYVYDFR	0.125674
Q9JIY2	E3 ubiquitin-protein ligase Hakai [Mus musculus]	Cbll1	dmR219	ASLENVHPPIAPPPTDIPDR	0.125798
E9PZB3	PREDICTED: 60S ribosomal protein L11-like [Mus musculus]	Gm5093	mmR13	ENPLREPR	0.126784
Q8K1J6	CCA tRNA nucleotidyltransferase 1, mitochondrial isoform b [Mus musculus]	Trnt1	mmR126	LHEENFEVTTLR	0.132345
O70305	ataxin-2 [Mus musculus]	Atxn2	dmR36; dmR39	RGGRGGAVAYPSAGPPPR	0.135439
Q8VEK3	heterogeneous nuclear ribonucleoprotein U [Mus musculus]	Hnrnpu	dmR709; dmR715; mmR730	RGNMPQRGGGGGSGGIGYPYPR	0.138543
Q8CCS6	polyadenylate-binding protein 2 [Mus musculus]	Pabpn1	mmR234	TSLALDESLFRGR	0.141135
Q3U1J4	DNA damage-binding protein 1 [Mus musculus]	Ddb1	mmR753	IEVQDSSGGTTALRPSASTQALSSSVSSSK	0.143624
Q8C6G8	WD repeat-containing protein 26 [Mus musculus]	Wdr26	mmR490	VRGYNFEDLTDR	0.144115
Q99MD6	thioredoxin reductase 3 isoform 1 [Mus musculus]	Txnrd3	dmR34	LGAVRGGLMSSPPGR	0.148565
Q8CBY8	dynactin subunit 4 [Mus musculus]	Dctn4	mmR402	DAAAEYDELAEPQDFQDDPDIVAFRK	0.150312
Q61466	SWI/SNF-related matrix-associated actin-dependent regulator of chromatin subfamily D member 1 [Mus musculus]	Smarcd1	dmR88	MTPQGPSMGPPGYGGNPSVRPGLAQSGMDQSR	0.152344
Q8VEK3	heterogeneous nuclear ribonucleoprotein U [Mus musculus]	Hnrnpu	dmR709; dmR715	RGNMPQRGGGGGSGGIGYPYPR	0.153178
Q9CYC5	kinetochore-associated protein DSN1 homolog [Mus musculus]	Dsn1	dmR334	SMDQLDSSPARK	0.155527
O54786	DNA fragmentation factor subunit alpha isoform a [Mus musculus]	Dffa	dmR322; mmR325	RSPLPGEPQRPKR	0.160394
A2AIV2	protein virilizer homolog [Mus musculus]	Kiaa1429	dmR396	LTELLDLYQEDR	0.164069
Q99LI2	chloride channel CLIC-like protein 1 isoform 2 precursor [Mus musculus]	Clcc1	mmR388; dmR401	GLDYRLHGGAGDADFSYRGPAGSIEQGPYDK	0.174352
O88569	heterogeneous nuclear ribonucleoproteins A2/B1 isoform 1 [Mus musculus]	Hnrnpa2b1	dmR213	SGRGGNFGFGDSRGGGGNFGPGPGSNFR	0.177327
Q9CQM9	glutaredoxin-3 [Mus musculus]	Glrx3	mmR101	NSQKVDRLDGAHAPELTK	0.177474
P63163	small nuclear ribonucleoprotein-associated protein N [Mus musculus]	Snrpn	dmR236	GPPPPGMRPPRP	0.182345
P97855	ras GTPase-activating protein-binding protein 1 [Mus musculus]	G3bp1	mmR445; mmR458	GPPRGGMVQKPGFGVGR	0.184844
P48722	heat shock 70 kDa protein 4L [Mus musculus]	Hspa4l	mmR405	EFSITDLVPYSVTLR	0.185244
Q9QXZ0	microtubule-actin cross-linking factor 1 isoform 2 [Mus musculus]	Macf1	mmR252	VQVQSNRENLEQAFEVAER	0.185898
Q64700	retinoblastoma-like protein 2 [Mus musculus]	Rbl2	mmR882	IWTCFEFSIIQCTELMMDR	0.187977
Q9CY57	Friend of PRMT1 protein [Mus musculus]	Chtop	dmR98	LGRPIGALARGAIGGR	0.199274
Q9D1E6	tubulin-folding cofactor B [Mus musculus]	Tbcb	mmR196	RGTVMYVGLTDFKPGYWVGVR	0.199659
Q61033	lamina-associated polypeptide 2 isoform alpha [Mus musculus]	Tmpo	dmR85	GPPDFSSDEEREPTPVLGSGASVGR	0.20323
Q9R020	zinc finger Ran-binding domain-containing protein 2 [Mus musculus]	Zranb2	dmR224; dmR226; mmR228	SSSPSSSRSRSR	0.203957
E9Q309	centrosome-associated protein 350 [Mus musculus]	Cep350	mmR2410	DSQSHRDRSQLTR	0.20782
Q60749	KH domain-containing, RNA-binding, signal transduction-associated protein 1 [Mus musculus]	Khdrbs1	dmR304; mmR310; dmR315	GRGVGPPRGALVR	0.217536
Q9DCL9	multifunctional protein ADE2 [Mus musculus]	Paics	mmR255	NFEWVADR	0.218176
Q61545	RNA-binding protein EWS [Mus musculus]	Ewsr1	dmR614; mmR631	RGGPGGPPGPLMEQMGGR	0.219485
Q9CX86	heterogeneous nuclear ribonucleoprotein A0 [Mus musculus]	Hnrnpa0	dmR293	SNSGPYRGGYGGGYGGGSF	0.222986
Q61545	RNA-binding protein EWS [Mus musculus]	Ewsr1	dmR470; mmR485	GMPPPLRGGPGGPGGPGGPMGR	0.2303
Q9WVA4	transgelin-2 [Mus musculus]	Tagln2	mmR182	NVIGLQMGTNRGASQAGMTGYGMPR	0.233623
Q60749	KH domain-containing, RNA-binding, signal transduction-associated protein 1 [Mus musculus]	Khdrbs1	dmR304; dmR310; mmR315	GRGVGPPRGALVR	0.262169
P63325	40S ribosomal protein S10 [Mus musculus]	Rps10	mmR153	AEAGAGSATEFQFR	0.293343
P97855	ras GTPase-activating protein-binding protein 1 [Mus musculus]	G3bp1	mmR458	GGMVQKPGFGVGRGITTPR	0.298171
Q569Z6	thyroid hormone receptor-associated protein 3 [Mus musculus]	Thrap3	dmR91; dmR108	NRGFYPWGQYNRGGYGNYR	0.314504
Q569Z6	thyroid hormone receptor-associated protein 3 [Mus musculus]	Thrap3	dmR91; dmR101	NRGFYPWGQYNRGGYGNYR	0.314624
Q569Z6	thyroid hormone receptor-associated protein 3 [Mus musculus]	Thrap3	dmR91; mmR101; mmR108	NRGFYPWGQYNRGGYGNYR	0.316588
O88569	heterogeneous nuclear ribonucleoproteins A2/B1 isoform 1 [Mus musculus]	Hnrnpa2b1	dmR203; mmR213	SGRGGNFGFGDSRGGGGNFGPGPGSNFR	0.318189
Q8CIM1	leucine-rich repeat-containing protein 45 [Mus musculus]	Lrrc45	dmR6; mmR10	MEEFRRSYNR	0.347003
P29341	polyadenylate-binding protein 1 [Mus musculus]	Pabpc1	dmR493	VANTSTQTMGPRPAAAAAAATPAVR	0.360639
Q8CCS6	polyadenylate-binding protein 2 [Mus musculus]	Pabpn1	dmR255; dmR259	TNRPGISTTDRGFPR	0.374247
Q60865	caprin-1 isoform a [Mus musculus]	Caprin1	mmR631	GPANGFRGGYDGYRPSFSNTPNSGYSQSQFTAPR	0.393227
Q8JZP9	GAS2-like protein 1 isoform beta [Mus musculus]	Gas2l1	mmR630; mmR632	SSLAGPEPSLTWARGR	0.395541
Q60865	caprin-1 isoform a [Mus musculus]	Caprin1	dmR631	GPANGFRGGYDGYRPSFSNTPNSGYSQSQFTAPR	0.396345
P49312	heterogeneous nuclear ribonucleoprotein A1 isoform a [Mus musculus]	Hnrnpa1	mmR218	GGGFGGNDNFGRGGNFSGR	0.397697
Q9CY57	Friend of PRMT1 protein [Mus musculus]	Chtop	dmR98; mmR104	LGRPIGALARGAIGGR	0.39792
Q61545	RNA-binding protein EWS [Mus musculus]	Ewsr1	mmR470	GMPPPLRGGPGGPGGPGGPMGR	0.408848
O70133	ATP-dependent RNA helicase A [Mus musculus]	Dhx9	dmR1361; dmR1372	RGYGGGYFGQGRGGGGGGGY	0.426167
P70227	inositol 1,4,5-trisphosphate receptor type 3 [Mus musculus]	Itpr3	mmR2470; dmR2480	ACDTLLMCIVTVMNHGLRNGGGVGDILR	0.429146
Q60749	KH domain-containing, RNA-binding, signal transduction-associated protein 1 [Mus musculus]	Khdrbs1	dmR304; dmR315	GRGVGPPRGALVR	0.431569
Q60749	KH domain-containing, RNA-binding, signal transduction-associated protein 1 [Mus musculus]	Khdrbs1	dmR304; mmR310; mmR315	GRGVGPPRGALVR	0.432819
Q8K4B0	metastasis-associated protein MTA1 [Mus musculus]	Mta1	dmR189	YQADITDLLKEGEEDGRDQSK	0.438601
E9Q4K7	kinesin-like protein KIF13B [Mus musculus]	Kif13b	dmR1376; dmR1377	LSRRSISSPSMNR	0.44691
Q60749	KH domain-containing, RNA-binding, signal transduction-associated protein 1 [Mus musculus]	Khdrbs1	dmR304; dmR310	GRGVGPPRGALVR	0.448038
Q80VD1	family with sequence similarity 98, member B [Mus musculus]	Fam98b	mmR404; mmR410	GGYGGRGGYGGRGYGDPYGGGGGGGGGYR	0.450638
Q8BG05	heterogeneous nuclear ribonucleoprotein A3 isoform a [Mus musculus]	Hnrnpa3	mmR52	KLFIGGLSFETTDDSLR; LFIGGLSFETTDDSLR	0.456643
O70166	stathmin-3 [Mus musculus]	Stmn3	mmR155	EAHLAALRER	0.460375
P19096	fatty acid synthase [Mus musculus]	Fasn	mmR606	EAVLAAYWR	0.470698
Q8C796	REST corepressor 2 [Mus musculus]	Rcor2	dmR479; dmR491	FLQPRLAPNQPPPPLIRPALAASR	0.483687
Q99020	heterogeneous nuclear ribonucleoprotein A/B isoform 2 [Mus musculus]	Hnrnpab	dmR253	EVYQQQQYGSGGRGNR	0.505704
F6ZDS4	nuclear pore complex-associated protein Tpr [Mus musculus]	Tpr	dmR2179	RQSVGRGLQLTPGIGGMQQHFFDDEDR	0.506502
Q8C079	hypothetical protein LOC229707 [Mus musculus]	Strip1	mmR461	SKFIGYTLGSDTNTVVGLPRPIHESIK	0.536396
Q9JIX8	apoptotic chromatin condensation inducer in the nucleus isoform 2 [Mus musculus]	Acin1	mmR29; mmR38	GVDYGSGRGQSGPFEGR	0.544277
Q8R326	paraspeckle component 1 [Mus musculus]	Pspc1	mmR507	TGSETPQAPMSGVGPVSGGPGGFGR; TGSETPQAPMSGVGPVSGGPGGFGRGSQGGNFEGPNKR; TGSETPQAPMSGVGPVSGGPGGFGRGSQGGNFEGPNK	0.554845
Q6PDL0	cytoplasmic dynein 1 light intermediate chain 2 [Mus musculus]	Dync1li2	dmR397	TQGRGGPASVPSASPGTSVK	0.558927
Q8CI61	BAG family molecular chaperone regulator 4 [Mus musculus]	Bag4	dmR54	GRGGAPAETTWPGEGAGGDGYYPSGGAWAEASR	0.570902
Q91W92	cdc42 effector protein 1 [Mus musculus]	Cdc42ep1	dmR53	HTMHVGRGGDVFGDTSFLSNHGGR	0.578915
Q91YD9	neural Wiskott-Aldrich syndrome protein isoform 1 [Mus musculus]	Wasl	dmR304	GRGAPPPPPSR	0.580686
Q80XI3	eukaryotic translation initiation factor 4 gamma 3 [Mus musculus]	Eif4g3	dmR687	QTPGGRGVPLLNVGPR	0.581324
Q6Y7W8	PERQ amino acid-rich with GYF domain-containing protein 2 isoform a [Mus musculus]	Gigyf2	dmR154	SFDEVEGVFGRGGGR	0.583264
O89086	putative RNA-binding protein 3 isoform 1 [Mus musculus]	Rbm3	mmR128	YDSRPGGYGYGYGR	0.586016
Q9CY57	Friend of PRMT1 protein [Mus musculus]	Chtop	dmR129	TLLRGGMSLR	0.586804
Q8R326	paraspeckle component 1 [Mus musculus]	Pspc1	dmR507	TGSETPQAPMSGVGPVSGGPGGFGRGSQGGNFEGPNKR; TGSETPQAPMSGVGPVSGGPGGFGRGSQGGNFEGPNK	0.597924
Q8VIJ6	splicing factor, proline- and glutamine-rich [Mus musculus]	Sfpq	dmR687	GMGPGTPAGYGRGR	0.606911
Q8VIJ6	splicing factor, proline- and glutamine-rich [Mus musculus]	Sfpq	dmR685	GMGPGTPAGYGRGR; FGQGGAGPVGGQGPRGMGPGTPAGYGR	0.606911
Q8R326	paraspeckle component 1 [Mus musculus]	Pspc1	dmR520	TGSETPQAPMSGVGPVSGGPGGFGRGSQGGNFEGPNKR	0.611413
Q3U5F4	yrdC domain-containing protein, mitochondrial precursor [Mus musculus]	Yrdc	dmR32	AAVAAGMGLSDGPASSGRGCR	0.615509
Q3U5F4	yrdC domain-containing protein, mitochondrial precursor [Mus musculus]	Yrdc	dmR29	AAVAAGMGLSDGPASSGRGCR	0.615515
Q3U5F4	yrdC domain-containing protein, mitochondrial precursor [Mus musculus]	Yrdc	mmR29; mmR32	AAVAAGMGLSDGPASSGRGCR	0.616197
Q6PDL0	cytoplasmic dynein 1 light intermediate chain 2 [Mus musculus]	Dync1li2	mmR397	TQGRGGPASVPSASPGTSVK	0.620125
Q3TLH4	protein PRRC2C [Mus musculus]	Prrc2c	dmR280; dmR282	SLRGRGPPPSWASEPERPSILSASELK	0.624787
Q5NC05	transcription termination factor 2 [Mus musculus]	Ttf2	mmR369	GSLQHSDQSVQRQMPAASGVSK	0.642506
P97855	ras GTPase-activating protein-binding protein 1 [Mus musculus]	G3bp1	mmR445; dmR464	GPPRGGMVQKPGFGVGRGITTPR	0.653147
P97855	ras GTPase-activating protein-binding protein 1 [Mus musculus]	G3bp1	mmR445; dmR458	GPPRGGMVQKPGFGVGRGITTPR	0.653147
O88291	zinc finger protein 326 [Mus musculus]	Znf326	dmR200	SYDAFGGPSTGR	0.664514
A2RSX7	tRNA wybutosine-synthesizing protein 5 isoform 1 [Mus musculus]	Tyw5	mmR5	AEQRLPVPR	0.67342
P59222	scavenger receptor class F member 2 precursor [Mus musculus]	Scarf2	dmR721	GRGLGLSEPTDAGGPPR	0.691379
Q8BFW7	lipoma-preferred partner homolog isoform 1 [Mus musculus]	Lpp	dmR219	SATKPQPAPQAAPIPVTPIGTLKPQPQPVPASYTTASTSSRPTFNVQVK	0.69287
O70305	ataxin-2 [Mus musculus]	Atxn2	dmR609	VSAGRGSMSSGLEFVSHNPPSEAAAPPVAR	0.700265
Q99MU3	double-stranded RNA-specific adenosine deaminase isoform 3 [Mus musculus]	Adar	dmR30	WRYPQPQGPESYPR	0.707897
Q9JIX8	apoptotic chromatin condensation inducer in the nucleus isoform 2 [Mus musculus]	Acin1	dmR29	GVDYGSGRGQSGPFEGR	0.707919
Q8VBX6	multiple PDZ domain protein [Mus musculus]	Mpdz	dmR1158	SLGISIVGGRGMGSR	0.712
Q3TLH4	protein PRRC2C [Mus musculus]	Prrc2c	dmR282	GRGPPPSWASEPERPSILSASELK	0.716141
Q8K4P0	WD repeat domain 33 isoform 1 [Mus musculus]	Wdr33	mmR1139	DNFPGPDDFGPEEGFDASDEAARGR	0.732724
P97379	ras GTPase-activating protein-binding protein 2 isoform a [Mus musculus]	G3bp2	dmR468	LGSGRGTGQMEGR	0.746869
D3Z3N4	heterogeneous nuclear ribonucleoprotein H3 [Mus musculus]	Hnrnph3	dmR323	MGMGNSYSGGYGAPDGLGGYGRGGGGSGGYYGQGGMSGGGWR	0.74844
Q3TLH4	protein PRRC2C [Mus musculus]	Prrc2c	mmR282	GRGPPPSWASEPERPSILSASELK	0.755982
Q3U5F4	yrdC domain-containing protein, mitochondrial precursor [Mus musculus]	Yrdc	dmR29; mmR32	AAVAAGMGLSDGPASSGRGCR	0.759517
Q3U5F4	yrdC domain-containing protein, mitochondrial precursor [Mus musculus]	Yrdc	mmR29; dmR32	AAVAAGMGLSDGPASSGRGCR	0.761805
Q80XS6	protein Smaug homolog 2 [Mus musculus]	Samd4b	dmR595	MGLLSPSGIGGVSPRHALTSPSLGGQGR	0.764943
Q91WJ8	far upstream element-binding protein 1 [Mus musculus]	Fubp1	mmR317	IQNDAGVRIQFKPDDGTTPDR; IQFKPDDGTTPDR	0.77579
A2BH40	AT-rich interactive domain-containing protein 1A [Mus musculus]	Arid1a	dmR431	MRPQPYGGTNPYSQQQGPPSGPQQGHGYPGQPYGSQTPQRYPMTMQGR	0.775962
A2BH40	AT-rich interactive domain-containing protein 1A [Mus musculus]	Arid1a	dmR439	MRPQPYGGTNPYSQQQGPPSGPQQGHGYPGQPYGSQTPQRYPMTMQGR	0.775962
Q8VIJ6	splicing factor, proline- and glutamine-rich [Mus musculus]	Sfpq	mmR25; mmR32	GGGGGRGGLHDFRSPPPGMGLNQNR	0.777267
B1AVB3	sex comb on midleg-like protein 2 [Mus musculus]	Scml2	dmR333	GRGFTQPLEDEARPGR	0.777483
Q9QXA5	U6 snRNA-associated Sm-like protein LSm4 [Mus musculus]	Lsm4	dmR100; dmR107; dmR113	GRGMGGAGRGVFGGR	0.778157
P57716	nicastrin precursor [Mus musculus]	Ncstn	dmR5	ATTRGGSGPDPGSR	0.786524
Q6ZWR6	nesprin-1 isoform 3 [Mus musculus]	Syne1	dmR8737; mmR8745	SDPRPERVGRAFLFR	0.787502
Q6Y7W8	PERQ amino acid-rich with GYF domain-containing protein 2 isoform b [Mus musculus]; PERQ amino acid-rich with GYF domain-containing protein 2 isoform a [Mus musculus]	Gigyf2	mmR150; mmR154	SFDEVEGVFGRGGGR	0.789755
Q3TLH4	protein PRRC2C [Mus musculus]	Prrc2c	mmR280; mmR282	SLRGRGPPPSWASEPERPSILSASELK	0.79214
Q8VIJ6	splicing factor, proline- and glutamine-rich [Mus musculus]	Sfpq	mmR673; mmR685	FGQGGAGPVGGQGPRGMGPGTPAGYGR	0.795864
Q3U182	CREB-regulated transcription coactivator 2 [Mus musculus]	Crtc2	dmR161	GQLFRLPSALNR	0.800735
Q61545	RNA-binding protein EWS [Mus musculus]	Ewsr1	dmR463	EGRGMPPPLR	0.802378
P31324	cAMP-dependent protein kinase type II-beta regulatory subunit [Mus musculus]	Prkar2b	mmR194	LVKEGEHVIDQGDDGDNFYVIDR; EGEHVIDQGDDGDNFYVIDR	0.824782
Q8VE88	hypothetical protein LOC67726 isoform 2 [Mus musculus]	Fam114a2	mmR321	EITDLFAQLHVSSRPEK	0.824866
P63163	small nuclear ribonucleoprotein-associated protein N [Mus musculus]	Snrpn	dmR108; dmR112	VPLAGAAGGPGVGRAAGRGVPAGVPIPQAPAGLAGPVR	0.829275
Q8C796	REST corepressor 2 [Mus musculus]	Rcor2	dmR479; dmR498	FLQPRLAPNQPPPPLIRPALAASR	0.834657
Q8C796	REST corepressor 2 [Mus musculus]	Rcor2	dmR479; mmR491; mmR498	FLQPRLAPNQPPPPLIRPALAASR	0.834657
Q8BI84	melanoma inhibitory activity protein 3 precursor [Mus musculus]	Mia3	dmR1881	EFFIPGTRLPPPTHGPQEYPPPPPAVR	0.834888
Q9CWS1	E3 ubiquitin-protein ligase RNF135 [Mus musculus]	Rnf135	mmR263	TLSYNLEVSNNSR	0.83779
P83882	60S ribosomal protein L36a [Mus musculus]	Rpl36a	mmR57	QSGYGGQTKPIFR	0.852857
E9Q0F0	keratin Kb40 [Mus musculus]	Krt78	mmR691; mmR703	GSGGQVTVPGREYGGQVTVPRGECGGQVTVPGR	0.853235
Q8BRH4	histone-lysine N-methyltransferase MLL3 [Mus musculus]	Kmt2c	dmR2447	SPVIPPLGPRYAVFPK	0.864943
Q6A0A2	la-related protein 4B [Mus musculus]	Larp4b	dmR497	VEPSSLESSPGLGRGR	0.868098
P61406	telomerase-binding protein EST1A [Mus musculus]	Smg6	dmR405	GRGILILPAHTALSVSSSGSPESTPLGPR	0.870485
E9PZM7	splicing factor, arginine/serine-rich 2, interacting protein [Mus musculus]	Scaf11	mmR1168	SGWTSASSWAVRK	0.880654
Q3TLH4	protein PRRC2C [Mus musculus]	Prrc2c	mmR1159	DRDWFPDQGYR	0.883432
Q8R311	cutaneous T-cell lymphoma-associated antigen 5 homolog isoform 1 [Mus musculus]	Ctage5	dmR714	DYFPPRDFPGPPLPPFPGR	0.888002
P06537	glucocorticoid receptor [Mus musculus]	Nr3c1	dmR24	GRGSVMDLYK	0.889756
Q80X95	ras-related GTP-binding protein A [Mus musculus]	Rraga	dmR34; dmR37; mmR38	SIIFANYIARDTRR	0.892851
Q6Y7W8	PERQ amino acid-rich with GYF domain-containing protein 2 isoform b [Mus musculus]; PERQ amino acid-rich with GYF domain-containing protein 2 isoform a [Mus musculus]	Gigyf2	dmR150	SFDEVEGVFGRGGGR	0.893059
P27048	small nuclear ribonucleoprotein-associated protein B [Mus musculus]	Snrpb	dmR108; mmR112	VPLAGAAGGPGIGRAAGRGIPAGVPMPQAPAGLAGPVR	0.893651
Q8BG05	heterogeneous nuclear ribonucleoprotein A3 isoform a [Mus musculus]	Hnrnpa3	dmR52	LFIGGLSFETTDDSLR	0.894595
Q9CY58	plasminogen activator inhibitor 1 RNA-binding protein isoform 1 [Mus musculus]	Serbp1	mmR366	KPANDITSQLEINFGDLGRPGRGGR	0.898876
O35071	kinesin-like protein KIF1C [Mus musculus]	Kif1c	dmR947; dmR957	QEQLRLQGLQGAGGRGGGLR	0.900211
P27048	small nuclear ribonucleoprotein-associated protein B [Mus musculus]	Snrpb	dmR147; dmR172; dmR181	GVGGPSQQVMTPQGRGTVAAAAAAATASIAGAPTQYPPGRGGPPPPMGR	0.90281
Q6A0A2	la-related protein 4B [Mus musculus]	Larp4b	mmR495; mmR497	VEPSSLESSPGLGRGR	0.905457
Q8R311	cutaneous T-cell lymphoma-associated antigen 5 homolog isoform 1 [Mus musculus]	Ctage5	dmR733; dmR742	TVYAPRGFPPYLPPRAGFFPPPPHPESR	0.906617
Q3U0V1	far upstream element-binding protein 2 [Mus musculus]	Khsrp	dmR412; dmR414; mmR416	SGPPGPPGAPGMPPGGRGRGR	0.907696
Q60749	KH domain-containing, RNA-binding, signal transduction-associated protein 1 [Mus musculus]	Khdrbs1	dmR291; dmR302	GRGAAPPPPPVPR	0.91612
P29341	polyadenylate-binding protein 1 [Mus musculus]	Pabpc1	mmR481; dmR493	VMSTQRVANTSTQTMGPRPAAAAAAATPAVR	0.920591
Q91WT8	RNA-binding protein 47 [Mus musculus]	Rbm47	dmR412	GSYLGGYSAGRGIYSR	0.922445
P62320	small nuclear ribonucleoprotein Sm D3 [Mus musculus]	Snrpd3	dmR114; dmR118	GRGMGRGNIFQK	0.929908
Q8K4P0	WD repeat domain 33 isoform 1 [Mus musculus]	Wdr33	dmR1256	GRGGPGPSQR	0.93042
Q9D011	TTD non-photosensitive 1 protein homolog [Mus musculus]	Mplkip	dmR76	HGGNFSGARFGSPSPGGYPGSYSR	0.937544
Q8BZ32	putative Polycomb group protein ASXL2 [Mus musculus]	Asxl2	dmR594	ARFPISITSPYR	0.944139
Q9Z1A1	protein TFG [Mus musculus]	Tfg	mmR382	NRPPFGQGYAQPGPGYR	0.964168
P27048	small nuclear ribonucleoprotein-associated protein B [Mus musculus]	Snrpb	dmR108; dmR112	VPLAGAAGGPGIGRAAGRGIPAGVPMPQAPAGLAGPVR; VPLAGAAGGPGIGRAAGR	0.976805
P27048	small nuclear ribonucleoprotein-associated protein B [Mus musculus]	Snrpb	mmR108; dmR112	VPLAGAAGGPGIGRAAGRGIPAGVPMPQAPAGLAGPVR	0.976902
A2AJK6	chromodomain-helicase-DNA-binding protein 7 [Mus musculus]	Chd7	dmR280	FSPNPPQQGAVRPQTLNFSSR	0.987026
Q9Z1A1	protein TFG [Mus musculus]	Tfg	dmR382	NRPPFGQGYAQPGPGYR	0.988589
G3X9M3	HMG box domain containing 3 isoform 1 [Mus musculus]	Hmgxb3	dmR496	AILPAPTSVGRGSGVGLPR	0.990886
P63325	40S ribosomal protein S10 [Mus musculus]	Rps10	dmR158; dmR160	GGFGRGRGQPPQ	0.99298
Q9WUU8	TNFAIP3-interacting protein 1 isoform 1 [Mus musculus]	Tnip1	dmR584	DWSQIRYPPPPVPMEHPPPHPNSR	0.994217
O55201	transcription elongation factor SPT5 [Mus musculus]	Supt5h	mmR690	ISSPMHPSAEGQHGGFGSPGGMSR	1.00175
Q3U0V1	far upstream element-binding protein 2 [Mus musculus]	Khsrp	dmR414; dmR416	SGPPGPPGAPGMPPGGRGRGR; GRGRGQGNWGPPGGEMTFSIPTHK	1.00634
E9Q8I7	nuclear transcription factor, X-box binding-like 1 [Mus musculus]	Nfxl1	mmR63; mmR66	GSGGAVSSGPGPGGAAALAPAGRGQR	1.0157
E9Q8I7	nuclear transcription factor, X-box binding-like 1 [Mus musculus]	Nfxl1	dmR63	GSGGAVSSGPGPGGAAALAPAGRGQR	1.01886
E9Q8I7	nuclear transcription factor, X-box binding-like 1 [Mus musculus]	Nfxl1	dmR66	GSGGAVSSGPGPGGAAALAPAGRGQR	1.01933
Q6PHQ9	polyadenylate-binding protein 4 isoform 1 [Mus musculus]	Pabpc4	dmR525; dmR534	LAMDFGGAGAAQQGLTDSCQSGGVPTAVPNLAPRAAVAAAAPRAVAPYK; LAMDFGGAGAAQQGLTDSCQSGGVPTAVPNLAPRAAVAAAAPR	1.02668
Q8BMB3	eukaryotic translation initiation factor 4E type 2 isoform 2 [Mus musculus]	Eif4e2	mmR241	LLFQNLWKPR	1.02975
Q99PP7	E3 ubiquitin-protein ligase TRIM33 isoform 1 [Mus musculus]	Trim33	dmR614; dmR620	LAQNAARIPGIPRHSAPQYSMMQPHLQR	1.0321
O09000	nuclear receptor coactivator 3 [Mus musculus]	Ncoa3	dmR1178; dmR1184	QLRMQLQQRLQGQQFLNQSR	1.03588
Q8K1I7	WAS/WASL-interacting protein family member 1 [Mus musculus]	Wipf1	dmR33	TEQAGRNALLSDISK	1.04243
Q3UJB0	splicing factor 3b, subunit 2 [Mus musculus]	Sf3b2	dmR485	NSVPVPRHWCFK	1.04269
Q6A0A9	constitutive coactivator of PPAR-gamma-like protein 1 [Mus musculus]	FAM120A	dmR882; dmR884	HFGPVPPSQGRGRGFAGVCGFGGHYGETVATGPYR	1.04573
E9Q4N7	AT rich interactive domain 1B (Swi1 like) [Mus musculus]	Arid1b	dmR477; mmR509; mmR517	RPQLYGMGTHPHSQPQQSSPYPGGSYGPPGAQRYPLGMQGR	1.04776
A2AGH6	mediator of RNA polymerase II transcription subunit 12 [Mus musculus]	Med12	dmR1901	TSVYRQQQPTVPQGQR	1.05365
P27048	small nuclear ribonucleoprotein-associated protein B [Mus musculus]	Snrpb	dmR112	AAGRGIPAGVPMPQAPAGLAGPVR	1.05618
Q8K4P0	WD repeat domain 33 isoform 1 [Mus musculus]	Wdr33	dmR909	APLLGDGPRAPFNQEGQSTGPPPLIPGLGQQGAQGR	1.05859
Q6Y7W8	PERQ amino acid-rich with GYF domain-containing protein 2 isoform a [Mus musculus]	Gigyf2	mmR150	SFDEVEGVFGRGGGR; SFDEVEGVFGR	1.06371
Q3U0V1	far upstream element-binding protein 2 [Mus musculus]	Khsrp	dmR412; dmR414	SGPPGPPGAPGMPPGGRGRGR	1.0649
Q3U0V1	far upstream element-binding protein 2 [Mus musculus]	Khsrp	dmR412; mmR414; mmR416	SGPPGPPGAPGMPPGGRGRGR	1.06516
P61979	heterogeneous nuclear ribonucleoprotein K [Mus musculus]	Hnrnpk	dmR268; dmR277; dmR278	MPPGRGGRPMPPSRR	1.06535
Q9ERU9	E3 SUMO-protein ligase RanBP2 [Mus musculus]	Ranbp2	dmR1015	SNFVQPMQGEVIRPPLTTPAHTTQPTPFK	1.06845
Q3U0V1	far upstream element-binding protein 2 [Mus musculus]	Khsrp	mmR412	SGPPGPPGAPGMPPGGR	1.07927
Q3U0V1	far upstream element-binding protein 2 [Mus musculus]	Khsrp	dmR414; mmR416	GRGRGQGNWGPPGGEMTFSIPTHK	1.08202
Q60668	heterogeneous nuclear ribonucleoprotein D0 isoform a [Mus musculus]	Hnrnpd	mmR272	EQYQQQQQWGSRGGFAGR	1.08492
Q61081	hsp90 co-chaperone Cdc37 [Mus musculus]	Cdc37	mmR107	SWEQKLEDMR	1.08957
P47809	dual specificity mitogen-activated protein kinase kinase 4 [Mus musculus]	Map2k4	mmR56	STARFTLNPNTTGVQNPHIER	1.10709
Q91WJ8	far upstream element-binding protein 1 [Mus musculus]	Fubp1	dmR357; dmR359	GRGRGQGNWNMGPPGGLQEFNFIVPTGK	1.10752
Q3U0V1	far upstream element-binding protein 2 [Mus musculus]	Khsrp	mmR412; dmR416	SGPPGPPGAPGMPPGGRGRGR	1.11901
Q60953	protein PML isoform 2 [Mus musculus]	Pml	dmR669	AVSLEAGLR	1.12098
Q8CCS6	polyadenylate-binding protein 2 [Mus musculus]	Pabpn1	dmR255	TNRPGISTTDRGFPR	1.12751
Q3U0V1	far upstream element-binding protein 2 [Mus musculus]	Khsrp	dmR412; mmR414	SGPPGPPGAPGMPPGGRGRGR; SGPPGPPGAPGMPPGGRGR	1.14577
Q91WD1	DNA-directed RNA polymerase III subunit RPC4 [Mus musculus]	Polr3d	mmR97; mmR99	GRGRPEVIQSHSIFEQGPAEMMK	1.16063
Q80W00	serine/threonine-protein phosphatase 1 regulatory subunit 10 isoform 2 [Mus musculus]	Ppp1r10	dmR737	SGGGPPNGRGGPGGGGMVGGGGHRPHEGPGGSMGSGHR	1.16868
Q91WD1	DNA-directed RNA polymerase III subunit RPC4 [Mus musculus]	Polr3d	dmR99	GRGRPEVIQSHSIFEQGPAEMMK	1.17348
Q80W00	serine/threonine-protein phosphatase 1 regulatory subunit 10 isoform 2 [Mus musculus]	Ppp1r10	mmR737; mmR752	SGGGPPNGRGGPGGGGMVGGGGHRPHEGPGGSMGSGHR	1.17483
A2AIV2	protein virilizer homolog [Mus musculus]	Kiaa1429	dmR1774; dmR1792	GRGGLGPSWASTNSGSGGSRGK	1.19507
A2AGH6	mediator of RNA polymerase II transcription subunit 12 [Mus musculus]	Med12	dmR1901; mmR1912; mmR1914	TSVYRQQQPTVPQGQRLR	1.1968
A2AIV2	protein virilizer homolog [Mus musculus]	Kiaa1429	dmR1772; dmR1774	ASRGRGGLGPSWASTNSGSGGSR	1.19922
Q3U0V1	far upstream element-binding protein 2 [Mus musculus]	Khsrp	mmR412; mmR414	SGPPGPPGAPGMPPGGRGR	1.19978
O88569	heterogeneous nuclear ribonucleoproteins A2/B1 isoform 2 [Mus musculus]	Hnrnpa2b1	dmR203	SGRGGNFGFGDSR	1.20485
P63017	heat shock cognate 71 kDa protein [Mus musculus]	Hspa8	mmR469	FELTGIPPAPR	1.21856
D3Z3N4	heterogeneous nuclear ribonucleoprotein H3 [Mus musculus]	Hnrnph3	mmR323	MGMGNSYSGGYGAPDGLGGYGR	1.21883
Q6PDK2	histone-lysine N-methyltransferase MLL2 [Mus musculus]	Kmt2d	dmR3725	QLQLQQQRMQLAQK	1.21967
Q922X9	protein arginine N-methyltransferase 7 [Mus musculus]	Prmt7	mmR32	ANPTTGSLEWLEEDEHYDYHQEIAR	1.22044
Q3U0V1	far upstream element-binding protein 2 [Mus musculus]	Khsrp	dmR416	GRGQGNWGPPGGEMTFSIPTHK	1.24447
Q9Z103	activity-dependent neuroprotector homeobox protein [Mus musculus]	Adnp	dmR68	SVGQSYGVGQSVRLGLGGNAPVSIPQQSQSVK	1.2513
O88291	zinc finger protein 326 [Mus musculus]	Znf326	dmR175	GRGTPAYPESTFGSR	1.2603
Q8BTI8	serine/arginine repetitive matrix protein 2 [Mus musculus]	Srrm2	mmR2337; mmR2345	MAPALSGANLTSPRVPLSAYDR	1.2683
Q8BTI8	serine/arginine repetitive matrix protein 2 [Mus musculus]	Srrm2	dmR2337	MAPALSGANLTSPRVPLSAYDR	1.30402
Q8BTI8	serine/arginine repetitive matrix protein 2 [Mus musculus]	Srrm2	dmR2345	MAPALSGANLTSPRVPLSAYDR	1.30596
Q3U0V1	far upstream element-binding protein 2 [Mus musculus]	Khsrp	mmR414; dmR416	GRGRGQGNWGPPGGEMTFSIPTHK	1.32143
Q91WT8	RNA-binding protein 47 [Mus musculus]	Rbm47	dmR407	GSYLGGYSAGRGIYSR	1.32812
Q8VIJ6	splicing factor, proline- and glutamine-rich [Mus musculus]	Sfpq	mmR685; mmR687	GMGPGTPAGYGRGR	1.33304
O88291	zinc finger protein 326 [Mus musculus]	Znf326	dmR200; dmR202	SYDAFGGPSTGRGR	1.34226
P30416	peptidyl-prolyl cis-trans isomerase FKBP4 [Mus musculus]	Fkbp4	mmR373	RGEAHLAVNDFDLAR; GEAHLAVNDFDLAR	1.34509
Q8VIJ6	splicing factor, proline- and glutamine-rich [Mus musculus]	Sfpq	mmR673	FGQGGAGPVGGQGPRGMGPGTPAGYGR	1.34512
Q9D011	TTD non-photosensitive 1 protein homolog [Mus musculus]	Mplkip	dmR125; dmR127	SPAGSQHQFGYSPGQQQTYPQGSPRTSTPFGSGRGR	1.34916
Q9QXA5	U6 snRNA-associated Sm-like protein LSm4 [Mus musculus]	Lsm4	dmR100; dmR107	GRGMGGAGRGVFGGR	1.34918
Q6A0A9	constitutive coactivator of PPAR-gamma-like protein 1 [Mus musculus]	FAM120A	dmR882; mmR884	HFGPVPPSQGRGRGFAGVCGFGGHYGETVATGPYR; HFGPVPPSQGRGR	1.41687
Q9R210	transcription factor EB isoform a [Mus musculus]	Tfeb	dmR8	IGLRMQLMR	1.42532
P27048	small nuclear ribonucleoprotein-associated protein N [Mus musculus]; small nuclear ribonucleoprotein-associated protein B [Mus musculus]	Snrpb	dmR147	GVGGPSQQVMTPQGR; GVGGPSQQVMTPQGRGTVAAAAAAATASIAGAPTQYPPGR	1.45179
Q8VIJ6	splicing factor, proline- and glutamine-rich [Mus musculus]	Sfpq	mmR685	FGQGGAGPVGGQGPRGMGPGTPAGYGR	1.48019
P29341	polyadenylate-binding protein 1 [Mus musculus]	Pabpc1	mmR493; mmR506	VANTSTQTMGPRPAAAAAAATPAVR	1.52582
Q8BU11	TOX high mobility group box family member 4 [Mus musculus]	Tox4	dmR479	VRINLQQQPPPLQSK	1.58287
P27048	small nuclear ribonucleoprotein-associated protein B [Mus musculus]	Snrpb	mmR108	VPLAGAAGGPGIGR	1.58358
Q8BRH4	histone-lysine N-methyltransferase MLL3 [Mus musculus]	Kmt2c	dmR3199	QYEEWLQETQQLLQMQQKYLEEQIGAHRK	1.5943
Q80W00	serine/threonine-protein phosphatase 1 regulatory subunit 10 isoform 2 [Mus musculus]	Ppp1r10	dmR707; dmR710	GRGGRGGNEPPPPPPFR	1.65152
Q99MD6	thioredoxin reductase 3 isoform 1 [Mus musculus]	Txnrd3	mmR34	LGAVRGGLMSSPPGR	1.67756
Q91WJ8	far upstream element-binding protein 1 [Mus musculus]	Fubp1	dmR357; mmR359	GRGRGQGNWNMGPPGGLQEFNFIVPTGK	1.67882
Q91WJ8	far upstream element-binding protein 1 [Mus musculus]	Fubp1	mmR357; dmR359	GRGRGQGNWNMGPPGGLQEFNFIVPTGK	1.6817
O88291	zinc finger protein 326 [Mus musculus]	Znf326	dmR173; mmR175	ENYSSYSSFSSPHMKPAPVGSRGRGTPAYPESTFGSR	1.69049
Q5RJ54	zinc finger protein 187 [Mus musculus]	Zscan26	dmR138; dmR149; mmR150	SRPTVLVGEPAPRR	1.69845
Q8VEK3	heterogeneous nuclear ribonucleoprotein U [Mus musculus]	Hnrnpu	dmR709	RGNMPQRGGGGGSGGIGYPYPR	1.71345
O88291	zinc finger protein 326 [Mus musculus]	Znf326	dmR200; mmR202	SYDAFGGPSTGRGR	1.75444
Q3U7U3	F-box only protein 7 [Mus musculus]	Fbxo7	dmR519	SADSRLPFL	1.78894
Q6A0A9	constitutive coactivator of PPAR-gamma-like protein 1 [Mus musculus]	FAM120A	dmR884	GRGFAGVCGFGGHYGETVATGPYR	1.86124
Q9D011	TTD non-photosensitive 1 protein homolog [Mus musculus]	Mplkip	dmR116; mmR125; mmR127	SPAGSQHQFGYSPGQQQTYPQGSPRTSTPFGSGRGR	1.88409
Q8K4P0	WD repeat domain 33 isoform 1 [Mus musculus]	Wdr33	dmR1309	SGSNWGRGSNMNSGPPR	1.92786
Q03347	runt-related transcription factor 1 isoform 1 [Mus musculus]	Runx1	dmR223	VSPHHPAPTPNPRASLNHSTAFNPQPQSQMQDAR	2.01624
Q91WD1	DNA-directed RNA polymerase III subunit RPC4 [Mus musculus]	Polr3d	dmR95; mmR97; mmR99	EGHGRGRGRPEVIQSHSIFEQGPAEMMK	2.02794
Q3U3R4	lipase maturation factor 1 [Mus musculus]	Lmf1	mmR2	RPDSLVMAAPEGSLR	2.03669
Q80VD1	family with sequence similarity 98, member B [Mus musculus]	Fam98b	dmR404; mmR410	GGYGGRGGYGGRGYGDPYGGGGGGGGGYR	2.31709
Q9QXA5	U6 snRNA-associated Sm-like protein LSm4 [Mus musculus]	Lsm4	dmR100; mmR107; dmR113	GRGMGGAGRGVFGGR	2.38505
Q2WF71	leucine-rich repeat and fibronectin type III domain-containing protein 1 isoform 2 [Mus musculus]	Lrfn1	mmR446; mmR452	WPAQRPVPGIR	2.3877
Q9QXA5	U6 snRNA-associated Sm-like protein LSm4 [Mus musculus]	Lsm4	dmR100; dmR107; mmR113	GRGMGGAGRGVFGGR	2.448
Q8VEK3	heterogeneous nuclear ribonucleoprotein U [Mus musculus]	Hnrnpu	mmR715	GNMPQRGGGGGSGGIGYPYPR	2.80203
P53996	cellular nucleic acid-binding protein isoform 1 [Mus musculus]	Cnbp	mmR25; dmR27; mmR30	ECPTGGGRGRGMR	2.89949
O88291	zinc finger protein 326 [Mus musculus]	Znf326	dmR200; dmR202; mmR204	SYDAFGGPSTGRGRGR	2.94604
P50446	keratin, type II cytoskeletal 6A [Mus musculus]	Krt6a	dmR358	YEELQVTAGR	2.97691
Q7TSC1	protein PRRC2A isoform 1 [Mus musculus]	Prrc2a	mmR1171; mmR1175	GRGGGRPPPVCSGWSPPAK	3.00489
Q7TSC1	protein PRRC2A isoform 1 [Mus musculus]	Prrc2a	dmR1171	GRGGGRPPPVCSGWSPPAK	3.00489
O88569	heterogeneous nuclear ribonucleoproteins A2/B1 isoform 1 [Mus musculus]	Hnrnpa2b1	mmR238	GGSDGYGSGRGFGDGYNGYGGGPGGGNFGGSPGYGGGR	3.00785
Q60865	caprin-1 isoform a [Mus musculus]	Caprin1	dmR665	DYSGYQRDGYQQNFK	3.07532
Q8BX09	retinoblastoma-binding protein 5 [Mus musculus]	Rbbp5	dmR220	GSCFLINTADR	3.08103
Q9QXA5	U6 snRNA-associated Sm-like protein LSm4 [Mus musculus]	Lsm4	dmR100; mmR107	GRGMGGAGRGVFGGR	3.09928
P50516	V-type proton ATPase catalytic subunit A [Mus musculus]	Atp6v1a	mmR323	TALVANTSNMPVAAR	3.17669
Q9QXA5	U6 snRNA-associated Sm-like protein LSm4 [Mus musculus]	Lsm4	dmR100; mmR107; mmR113	GRGMGGAGRGVFGGR	3.23503
Q8VEK3	heterogeneous nuclear ribonucleoprotein U [Mus musculus]	Hnrnpu	dmR715	GNMPQRGGGGGSGGIGYPYPR	3.29385
O35071	kinesin-like protein KIF1C [Mus musculus]	Kif1c	mmR947; dmR957	QEQLRLQGLQGAGGRGGGLR	3.32115
Q8VC31	coiled-coil domain-containing protein 9 isoform 1 [Mus musculus]	Ccdc9	dmR133	GRGSPHLLGAGDNSTSDR	3.3835
P61407	tudor domain-containing protein 6 isoform 2 [Mus musculus]	Tdrd6	mmR95	VVSRQAQDSR	3.59105
Q80VD1	family with sequence similarity 98, member B [Mus musculus]	Fam98b	dmR351; dmR380	GGGGGGRGGWGGGGGWGGGGGSGGGWGGSGGGGGGRGGFQGR	3.60639
P56959	RNA-binding protein FUS [Mus musculus]	Fus	dmR387; mmR400	GGPMGRGGYGGGGSGGGGRGGFPSGGGGGGGQQR	3.61014
Q9CY57	Friend of PRMT1 protein [Mus musculus]	Chtop	mmR135	GGMSLRGQNLLR	3.62204
Q8VEK3	heterogeneous nuclear ribonucleoprotein U [Mus musculus]	Hnrnpu	dmR709; mmR715	RGNMPQRGGGGGSGGIGYPYPR	3.66613
E9PZM7	splicing factor, arginine/serine-rich 2, interacting protein [Mus musculus]	Scaf11	mmR1096	NFGPGWMSSR	3.73501
Q60749	KH domain-containing, RNA-binding, signal transduction-associated protein 1 [Mus musculus]	Khdrbs1	dmR291; dmR302; mmR304	GRGAAPPPPPVPRGR	3.77589
Q569Z6	thyroid hormone receptor-associated protein 3 [Mus musculus]	Thrap3	mmR837; mmR841	GRGWGRGNYSGNNNNNSNNDFQK	3.7882
Q8VIJ6	splicing factor, proline- and glutamine-rich [Mus musculus]	Sfpq	dmR25; dmR32	GGGGGRGGLHDFRSPPPGMGLNQNR	3.84397
Q922B9	sperm-specific antigen 2 homolog [Mus musculus]	Ssfa2	dmR1050	AVRVPSPFRPSALPGMCGSR	3.85877
Q6PCZ4	melanoma-associated antigen E1 [Mus musculus]	Magee1	mmR909; mmR910; mmR915	AEAGRRPLIVR	3.88329
Q7TSC1	protein PRRC2A isoform 1 [Mus musculus]	Prrc2a	dmR1024; mmR1026	GRGRGEYFAR	3.98552
O88569	heterogeneous nuclear ribonucleoproteins A2/B1 isoform 1 [Mus musculus]	Hnrnpa2b1	dmR238; mmR266	GGSDGYGSGRGFGDGYNGYGGGPGGGNFGGSPGYGGGR	3.99913
Q3U0V1	far upstream element-binding protein 2 [Mus musculus]	Khsrp	mmR479	QLPPNGDPNFKLFVIR	4.19134
Q8BYJ6	TBC1 domain family member 4 [Mus musculus]	Tbc1d4	mmR1050	FLMYDLGFRK	4.2626
O35071	kinesin-like protein KIF1C [Mus musculus]	Kif1c	dmR957	LQGLQGAGGRGGGLR	4.27436
O35071	kinesin-like protein KIF1C [Mus musculus]	Kif1c	mmR957; mmR962	LQGLQGAGGRGGGLR	4.2752
A2AIV2	protein virilizer homolog [Mus musculus]	Kiaa1429	dmR1623; dmR1625	GRGRGGFGQGIRPHDIFR	4.53612
Q8K4P0	WD repeat domain 33 isoform 1 [Mus musculus]	Wdr33	mmR1309	SGSNWGRGSNMNSGPPR	4.60527
Q5HZJ0	ribonuclease 3 [Mus musculus]	Drosha	dmR21; dmR27; dmR34; dmR39	GRGGHGARPSAPAFRPQNLR	4.86162
P35550	rRNA 2'-O-methyltransferase fibrillarin [Mus musculus]	Fbl	dmR15	GGGFGGRGGFGDR	4.98183
Q9CY57	Friend of PRMT1 protein [Mus musculus]	Chtop	mmR129	TLLRGGMSLR	5.04653
O88569	heterogeneous nuclear ribonucleoproteins A2/B1 isoform 1 [Mus musculus]	Hnrnpa2b1	dmR238	GGSDGYGSGRGFGDGYNGYGGGPGGGNFGGSPGYGGGR	5.06149
Q60749	KH domain-containing, RNA-binding, signal transduction-associated protein 1 [Mus musculus]	Khdrbs1	mmR291	GRGAAPPPPPVPR	5.07028
Q8BG05	heterogeneous nuclear ribonucleoprotein A3 isoform a [Mus musculus]	Hnrnpa3	dmR226	GGGSGNFMGRGGNFGGGGGNFGR	5.11532
Q8VEK3	heterogeneous nuclear ribonucleoprotein U [Mus musculus]	Hnrnpu	mmR709	RGNMPQRGGGGGSGGIGYPYPR	5.27298
Q9WUU9	80 kDa MCM3-associated protein [Mus musculus]	Mcm3ap	mmR1148; mmR1153	AEEERLKQER	5.50639
Q60749	KH domain-containing, RNA-binding, signal transduction-associated protein 1 [Mus musculus]	Khdrbs1	dmR331	GATVTRGVPPPPTVR	5.57722
Q8BG05	heterogeneous nuclear ribonucleoprotein A3 isoform a [Mus musculus]	Hnrnpa3	dmR239; mmR246	GGNFGGGGGNFGRGGNFGGR	5.60781
P61979	heterogeneous nuclear ribonucleoprotein K [Mus musculus]	Hnrnpk	mmR256; mmR258	GRPVGFPMRGR	5.72974
Q8BG05	heterogeneous nuclear ribonucleoprotein A3 isoform a [Mus musculus]	Hnrnpa3	mmR226; mmR239	GGGSGNFMGRGGNFGGGGGNFGR	5.75889
P49312	heterogeneous nuclear ribonucleoprotein A1 isoform a [Mus musculus]	Hnrnpa1	mmR218; mmR225	GGGFGGNDNFGRGGNFSGR	5.87054
Q00PI9	heterogeneous nuclear ribonucleoprotein U-like protein 2 [Mus musculus]	Hnrnpul2	mmR682	AYGQQYWGQSGNRGGYR	5.87878
O70305	ataxin-2 [Mus musculus]	Atxn2	mmR36; mmR39	RGGRGGAVAYPSAGPPPR	5.93834
P97855	ras GTPase-activating protein-binding protein 1 [Mus musculus]	G3bp1	mmR464	GGMVQKPGFGVGRGITTPR	6.03972
Q80W00	serine/threonine-protein phosphatase 1 regulatory subunit 10 isoform 2 [Mus musculus]	Ppp1r10	dmR707; mmR710	GRGGRGGNEPPPPPPFR	6.12951
Q61545	RNA-binding protein EWS [Mus musculus]	Ewsr1	mmR614	RGGPGGPPGPLMEQMGGR	6.13673
Q8BG05	heterogeneous nuclear ribonucleoprotein A3 isoform a [Mus musculus]	Hnrnpa3	dmR246; mmR257	GGNFGGRGGYGGGGGGSRGSYGGGDGGYNGFGGDGGNYGGGPGYSSR	6.18066
Q00PI9	heterogeneous nuclear ribonucleoprotein U-like protein 2 [Mus musculus]	Hnrnpul2	mmR686	AYGQQYWGQSGNRGGYR	6.5575
A2AIV2	protein virilizer homolog [Mus musculus]	Kiaa1429	mmR1774	GRGGLGPSWASTNSGSGGSR	6.59085
D3Z6P0	protein disulfide-isomerase A2 [Mus musculus]	Pdia2	dmR308	EAAPPFR	6.65218
P27048	small nuclear ribonucleoprotein-associated protein N [Mus musculus]	Snrpb	mmR147	GVGGPSQQVMTPQGR	6.66892
Q61151	serine/threonine-protein phosphatase 2A 56 kDa regulatory subunit epsilon isoform [Mus musculus]	Ppp2r5e	dmR205	ERDYLKTVLHR	6.96786
P49312	heterogeneous nuclear ribonucleoprotein A1 isoform a [Mus musculus]	Hnrnpa1	dmR206; mmR218	SGSGNFGGGRGGGFGGNDNFGR	7.00272
Q80W00	serine/threonine-protein phosphatase 1 regulatory subunit 10 isoform 2 [Mus musculus]	Ppp1r10	mmR707; dmR710	GRGGRGGNEPPPPPPFR	7.04047
Q4U2R1	E3 ubiquitin-protein ligase HERC2 [Mus musculus]	Herc2	mmR4412	VVQATMVRDRQHGPVVELNR	7.06994
Q6DID5	PWWP domain-containing protein MUM1 [Mus musculus]	Mum1	mmR448	HALLDRAKEDFAQAIGWCVSLITDYR	7.24052
Q9CPQ5	centromere protein Q [Mus musculus]	Cenpq	mmR8	MKMSGKAR	7.5973
Q60749	KH domain-containing, RNA-binding, signal transduction-associated protein 1 [Mus musculus]	Khdrbs1	mmR331	GATVTRGVPPPPTVR	7.7483
P61979	heterogeneous nuclear ribonucleoprotein K [Mus musculus]	Hnrnpk	mmR256	GRPVGFPMRGR	7.76609
Q9R226	KH domain-containing, RNA-binding, signal transduction-associated protein 3 [Mus musculus]	Khdrbs3	dmR212	GRGGVTARPVAVGVPR	7.81794
P56959	RNA-binding protein FUS [Mus musculus]	Fus	dmR387; dmR400	GGPMGRGGYGGGGSGGGGRGGFPSGGGGGGGQQR	8.23325
P97855	ras GTPase-activating protein-binding protein 1 [Mus musculus]	G3bp1	mmR458; mmR464	GGMVQKPGFGVGRGITTPR	8.28411
P97855	ras GTPase-activating protein-binding protein 1 [Mus musculus]	G3bp1	dmR458	GGMVQKPGFGVGRGITTPR	8.39681
O70133	ATP-dependent RNA helicase A [Mus musculus]	Dhx9	mmR1361; dmR1372	RGYGGGYFGQGRGGGGGGGY	8.44902
Q9CY58	plasminogen activator inhibitor 1 RNA-binding protein isoform 1 [Mus musculus]; plasminogen activator inhibitor 1 RNA-binding protein isoform 2 [Mus musculus]	Serbp1	dmR177; mmR181	GRGMGRGDGFDSR	8.46359
O89086	putative RNA-binding protein 3 isoform 1 [Mus musculus]	Rbm3	dmR90; dmR97; mmR99	GSRGGAFGGRGR	8.48495
O70133	ATP-dependent RNA helicase A [Mus musculus]	Dhx9	mmR1372	GYGGGYFGQGRGGGGGGGY; RGYGGGYFGQGRGGGGGGGY	8.51175
Q8VIJ6	splicing factor, proline- and glutamine-rich [Mus musculus]	Sfpq	dmR25; mmR32	GGGGGRGGLHDFRSPPPGMGLNQNR	8.62204
Q9CQA5	mediator of RNA polymerase II transcription subunit 4 [Mus musculus]	Med4	mmR13	MAASSSGEKEKER	8.71211
Q61655	ATP-dependent RNA helicase DDX19A [Mus musculus]	Ddx19a	dmR435	RGLAVNMVDSK	8.91605
P97855	ras GTPase-activating protein-binding protein 1 [Mus musculus]	G3bp1	dmR464	GGMVQKPGFGVGRGITTPR	9.16426
Q9Z2E1	methyl-CpG-binding domain protein 2 [Mus musculus]	Mbd2	dmR92; dmR94; dmR96	GRGRGRPQSGGSGLGGDGGGGAGGCGGGSGGGVAPR	9.40561
Q7TSC1	protein PRRC2A isoform 1 [Mus musculus]	Prrc2a	dmR1024; dmR1026	GRGRGEYFAR	9.41995
P35922	fragile X mental retardation protein 1 homolog [Mus musculus]	Fmr1	dmR470; dmR473	GYVTDDGQGMGRGSRPYR	9.71436
Q7TMK9	heterogeneous nuclear ribonucleoprotein Q isoform 2 [Mus musculus]; heterogeneous nuclear ribonucleoprotein Q isoform 1 [Mus musculus]	Syncrip	mmR496	GGYEDPYYGYEDFQVGAR	9.75742
P14824	annexin A6 isoform a [Mus musculus]	Anxa6	dmR276; dmR281; dmR290	DNTLIRIMVSRSELDMLDIR	9.81432
Q569Z6	thyroid hormone receptor-associated protein 3 [Mus musculus]	Thrap3	dmR837; dmR841	GRGWGRGNYSGNNNNNSNNDFQK	9.89388
E9Q414	apolipoprotein B precursor [Mus musculus]	Apob	mmR960	TEVIPPLVENR	9.97245
Q60749	KH domain-containing, RNA-binding, signal transduction-associated protein 1 [Mus musculus]	Khdrbs1	dmR304; mmR310	GRGVGPPRGALVR	10.0128
P56959	RNA-binding protein FUS [Mus musculus]	Fus	mmR381; dmR387	GRGGPMGRGGYGGGGSGGGGR	10.4003
A2AIV2	protein virilizer homolog [Mus musculus]	Kiaa1429	dmR1772; mmR1774	ASRGRGGLGPSWASTNSGSGGSR	10.4088
Q8BG05	heterogeneous nuclear ribonucleoprotein A3 isoform a [Mus musculus]	Hnrnpa3	mmR216; mmR226	GRGGGSGNFMGRGGNFGGGGGNFGR	10.9002
Q8BG05	heterogeneous nuclear ribonucleoprotein A3 isoform a [Mus musculus]	Hnrnpa3	mmR226	GGGSGNFMGRGGNFGGGGGNFGR	10.9666
A2AIV2	protein virilizer homolog [Mus musculus]	Kiaa1429	dmR1774; mmR1792	GRGGLGPSWASTNSGSGGSRGK	11.3817
Q60668	heterogeneous nuclear ribonucleoprotein D0 isoform c [Mus musculus]	Hnrnpd	mmR278	EQYQQQQQWGSRGGFAGR	11.3865
Q7TMK9	heterogeneous nuclear ribonucleoprotein Q isoform 1 [Mus musculus]	Syncrip	mmR444	NQMYDDYYYYGPPHMPPPTR	11.5284
O70305	ataxin-2 [Mus musculus]	Atxn2	dmR39	GGRGGAVAYPSAGPPPR	11.6193
Q8VHM5	heterogeneous nuclear ribonucleoprotein R [Mus musculus]	Hnrnpr	mmR525; mmR531	GRAGYSQRGAPLGPPR	11.8508
Q8BG05	heterogeneous nuclear ribonucleoprotein A3 isoform a [Mus musculus]	Hnrnpa3	dmR216; dmR226; mmR239	GRGGGSGNFMGRGGNFGGGGGNFGR	11.9891
Q9CY57	Friend of PRMT1 protein [Mus musculus]	Chtop	dmR104	GAIGGRGLPIIQR	12.6309
P49312	heterogeneous nuclear ribonucleoprotein A1 isoform a [Mus musculus]	Hnrnpa1	mmR225	GGGFGGNDNFGRGGNFSGR	13.0026
Q8VEK3	heterogeneous nuclear ribonucleoprotein U [Mus musculus]	Hnrnpu	dmR685; dmR691	GRGGFNMRGGNFR	13.3565
Q8BG05	heterogeneous nuclear ribonucleoprotein A3 isoform a [Mus musculus]	Hnrnpa3	dmR239; dmR257	GGNFGGGGGNFGRGGNFGGRGGYGGGGGGSR	13.3696
Q80VD1	family with sequence similarity 98, member B [Mus musculus]	Fam98b	dmR380	GGWGGGGGWGGGGGSGGGWGGSGGGGGGRGGFQGR	13.6918
Q569Z6	thyroid hormone receptor-associated protein 3 [Mus musculus]	Thrap3	mmR101	GFYPWGQYNRGGYGNYR	13.9194
Q8K1N2	pleckstrin homology-like domain family B member 2 [Mus musculus]	Phldb2	mmR795	NNLIMMLQR	14.1807
Q9ER00	syntaxin-12 [Mus musculus]	Stx12	dmR97	ELGSLPLPLSASEQR	14.2086
Q80VD1	family with sequence similarity 98, member B [Mus musculus]	Fam98b	dmR410	GGYGGRGYGDPYGGGGGGGGGYRR; GGYGGRGYGDPYGGGGGGGGGYR	14.9336
Q6A0A9	constitutive coactivator of PPAR-gamma-like protein 1 [Mus musculus]	FAM120A	dmR962; mmR965	GRGGRGPFPLQVVSVGGPAR	15.1999
P49312	heterogeneous nuclear ribonucleoprotein A1 isoform a [Mus musculus]	Hnrnpa1	mmR206	SGSGNFGGGRGGGFGGNDNFGR	16.0881
Q80VD1	family with sequence similarity 98, member B [Mus musculus]	Fam98b	dmR404; dmR410	GGYGGRGGYGGRGYGDPYGGGGGGGGGYR	17.0645
Q9Z1Y4	thyroid receptor-interacting protein 6 [Mus musculus]	Trip6	dmR16	QPEPSR	17.6641
Q8VEK3	heterogeneous nuclear ribonucleoprotein U [Mus musculus]	Hnrnpu	mmR737	GPVFPGRGGYSNR	17.7314
Q8BG05	heterogeneous nuclear ribonucleoprotein A3 isoform a [Mus musculus]	Hnrnpa3	mmR216; mmR226; mmR239	GRGGGSGNFMGRGGNFGGGGGNFGR	18.9573
Q8VHM5	heterogeneous nuclear ribonucleoprotein R [Mus musculus]	Hnrnpr	mmR499	GGYEDPYYGYDDGYAVR	20.256
Q9CX86	heterogeneous nuclear ribonucleoprotein A0 [Mus musculus]	Hnrnpa0	mmR293	SNSGPYRGGYGGGYGGGSF	20.2628
Q569Z6	thyroid hormone receptor-associated protein 3 [Mus musculus]	Thrap3	dmR841	GWGRGNYSGNNNNNSNNDFQK	20.9696
P49312	heterogeneous nuclear ribonucleoprotein A1 isoform a [Mus musculus]	Hnrnpa1	mmR206; mmR218	SGSGNFGGGRGGGFGGNDNFGR	21.5901
Q8BG05	heterogeneous nuclear ribonucleoprotein A3 isoform a [Mus musculus]	Hnrnpa3	dmR216	GRGGGSGNFMGR	21.7918
P49312	heterogeneous nuclear ribonucleoprotein A1 isoform a [Mus musculus]	Hnrnpa1	dmR206	SGSGNFGGGRGGGFGGNDNFGR	21.8483
P56959	RNA-binding protein FUS [Mus musculus]	Fus	mmR400	GGYGGGGSGGGGRGGFPSGGGGGGGQQR	21.8722
Q4VBF2	R3H domain-containing protein C19orf22 homolog [Mus musculus]	R3hdm4	dmR147	RGPGRGEDR	21.9331
A2ASS6	titin isoform N2-A [Mus musculus]	Ttn	dmR1129	SGVPLTTGYR	22.052
P56959	RNA-binding protein FUS [Mus musculus]	Fus	dmR381; dmR387	GRGGPMGRGGYGGGGSGGGGR	22.727
Q8K4P0	WD repeat domain 33 isoform 1 [Mus musculus]	Wdr33	mmR1302; dmR1309	GARSGSNWGRGSNMNSGPPR	24.1847
P49312	heterogeneous nuclear ribonucleoprotein A1 isoform a [Mus musculus]	Hnrnpa1	mmR196; dmR206	GRSGSGNFGGGRGGGFGGNDNFGR	25.9789
Q8VC31	coiled-coil domain-containing protein 9 isoform 1 [Mus musculus]	Ccdc9	dmR131; dmR133	GRGRGSPHLLGAGDNSTSDR	27.8925
Q8BG05	heterogeneous nuclear ribonucleoprotein A3 isoform a [Mus musculus]	Hnrnpa3	mmR239	GGNFGGGGGNFGRGGNFGGR	27.9194
O70133	ATP-dependent RNA helicase A [Mus musculus]	Dhx9	dmR1372	GYGGGYFGQGRGGGGGGGY; RGYGGGYFGQGRGGGGGGGY	29.7409
Q8BG05	heterogeneous nuclear ribonucleoprotein A3 isoform a [Mus musculus]	Hnrnpa3	mmR239; mmR246	GGNFGGGGGNFGRGGNFGGRGGYGGGGGGSR; GGNFGGGGGNFGRGGNFGGR	30.1997
A2AIV2	protein virilizer homolog [Mus musculus]	Kiaa1429	mmR1623; dmR1633	GRGRGGFGQGIRPHDIFR	31.0166
Q8BG05	heterogeneous nuclear ribonucleoprotein A3 isoform a [Mus musculus]	Hnrnpa3	dmR239	GGNFGGGGGNFGRGGNFGGRGGYGGGGGGSR; GGNFGGGGGNFGRGGNFGGR	33.384
Q6PDG8	vacuolar fusion protein MON1 homolog A [Mus musculus]	Mon1a	dmR267; dmR285	RLLSGSERITDNLLQLMAR	34.8154
Q7TMK9	heterogeneous nuclear ribonucleoprotein Q isoform 2 [Mus musculus]	Syncrip	dmR520	GRAGYSQR	35.5771
Q8VHM5	heterogeneous nuclear ribonucleoprotein R [Mus musculus]	Hnrnpr	dmR525; dmR531	GRAGYSQRGAPLGPPR	38.1093
Q8BG05	heterogeneous nuclear ribonucleoprotein A3 isoform a [Mus musculus]	Hnrnpa3	dmR246	GGNFGGGGGNFGRGGNFGGR	39.8981
Q3ULJ3	UPF3 regulator of nonsense transcripts homolog A [Mus musculus]	Upf3a	mmR383	GFAQDRGK	40.3231
Q8VHM5	heterogeneous nuclear ribonucleoprotein R [Mus musculus]	Hnrnpr	dmR525; mmR531	GRAGYSQRGAPLGPPR	43.0725
Q80VD1	family with sequence similarity 98, member B [Mus musculus]	Fam98b	mmR404; dmR410	GGYGGRGGYGGRGYGDPYGGGGGGGGGYR	44.0074
A2AIV2	protein virilizer homolog [Mus musculus]	Kiaa1429	dmR1774	GRGGLGPSWASTNSGSGGSR	44.2542
Q569Z6	thyroid hormone receptor-associated protein 3 [Mus musculus]	Thrap3	dmR837; mmR841	GRGWGRGNYSGNNNNNSNNDFQK	45.5167
Q8BG05	heterogeneous nuclear ribonucleoprotein A3 isoform a [Mus musculus]	Hnrnpa3	dmR216; mmR226	GRGGGSGNFMGR; GRGGGSGNFMGRGGNFGGGGGNFGR	46.0503
P56959	RNA-binding protein FUS [Mus musculus]	Fus	dmR219	GRGGGGGYNR	46.6359
Q8BG05	heterogeneous nuclear ribonucleoprotein A3 isoform a [Mus musculus]	Hnrnpa3	mmR239; dmR257	GGNFGGGGGNFGRGGNFGGRGGYGGGGGGSR	46.9174
Q8BG05	heterogeneous nuclear ribonucleoprotein A3 isoform a [Mus musculus]	Hnrnpa3	dmR216; dmR226	GRGGGSGNFMGRGGNFGGGGGNFGR	47.3781
Q5U4C3	splicing factor, arginine/serine-rich 19 [Mus musculus]	Scaf1	dmR829	SPFLKPDER	49.9447
Q9CY58	plasminogen activator inhibitor 1 RNA-binding protein isoform 1 [Mus musculus]	Serbp1	mmR177; dmR181	GRGMGRGDGFDSR	51.6438
Q8BG05	heterogeneous nuclear ribonucleoprotein A3 isoform a [Mus musculus]	Hnrnpa3	mmR239; dmR246	GGNFGGGGGNFGRGGNFGGRGGYGGGGGGSR	53.193
Q8VHM5	heterogeneous nuclear ribonucleoprotein R [Mus musculus]	Hnrnpr	mmR525; dmR531	GRAGYSQRGAPLGPPR	53.3127
Q60749	KH domain-containing, RNA-binding, signal transduction-associated protein 1 [Mus musculus]	Khdrbs1	dmR291; mmR302	GRGAAPPPPPVPR	54.1616
Q9CY58	plasminogen activator inhibitor 1 RNA-binding protein isoform 1 [Mus musculus]	Serbp1	dmR177; dmR181	GRGMGRGDGFDSR	58.7376
Q9WVF7	DNA polymerase epsilon catalytic subunit A [Mus musculus]	Pole	mmR1578	FLLAYKEER	74.0723
Q60865	caprin-1 isoform a [Mus musculus]	Caprin1	dmR688	GRGGPPRPNR	79.7963
P56959	RNA-binding protein FUS [Mus musculus]	Fus	dmR400	GGYGGGGSGGGGRGGFPSGGGGGGGQQR	99.9335
Q62407	striated muscle-specific serine/threonine-protein kinase isoform 2 [Mus musculus]	Speg	dmR1245	MTQYRDIHR	110.351
Q60749	KH domain-containing, RNA-binding, signal transduction-associated protein 1 [Mus musculus]	Khdrbs1	dmR291	GRGAAPPPPPVPR	117.6
Q8BG05	heterogeneous nuclear ribonucleoprotein A3 isoform a [Mus musculus]	Hnrnpa3	mmR246	GGNFGGGGGNFGRGGNFGGR	171.671
